# Supplementary material for: Radical abstraction vs. oxidative addition mechanisms for the activation of the S–H, O–H, and C–H bonds using early transition metal oxides
Source: Royal Society of Chemistry journal article supplement (doi:10.1039/d0cp05513a), 2020-12-18
Supplement: d0cp05513a1.pdf [file d0cp05513a1.pdf]

## Electronic Supplementary Information

*Radical abstraction vs. oxidative addition mechanisms for the activation of  
the S–H, O–H, and C–H bonds using early transition metal oxides*

*Isuru R. Ariyaratna and Evangelos Miliordos\**

Department of Chemistry and Biochemistry, Auburn University, Auburn, AL 36849-5312, USA

\* E-mail: [emiliord@auburn.edu](mailto:emiliord@auburn.edu)

## MRCI calculations

We recently studied the electronic structure of the ground and several excited electronic states of  $\text{ZrO}^+$  and  $\text{NbO}^+$  [I. R. Ariyaratna and E. Miliordos, *Journal of Quantitative Spectroscopy and Radiative Transfer*, 2020, **255**, 107265]. In the present work, we considered their reaction with  $\text{H}_2\text{O}$  and  $\text{H}_2\text{S}$  for the  $X^2\Delta$ ,  $1^2\Sigma^+$ ,  $1^2\Pi$ , and  $1^4\Pi$  states of  $\text{ZrO}^+$  and  $X^3\Sigma^-$ ,  $1^1\Gamma$ ,  $1^3\Delta$ ,  $1^1\Sigma^+$ , and  $1^5\Sigma^-$  states for  $\text{NbO}^+$ . The wavefunction of the  $1^4\Pi$  state of  $\text{ZrO}^+$  and the  $1^1\Gamma$ ,  $1^1\Sigma^+$ , and  $1^5\Sigma^-$  states of  $\text{NbO}^+$  bear two equivalent dominant electronic configurations, but the rest of the states are of single-reference character. The coordination of  $\text{H}_2\text{X}$  to the metals results in the elimination of one of the two dominant configurations in the former states. Generally, transition states and products are single reference.

All minima and transition states were optimized at the MRCI level of theory and they are depicted in Figures S2 and S3. The energy diagrams at the MRCI+Q//MRCI level (single point MRCI+Q energies at the MRCI optimized structures) are plotted in Figure S1. To assess our theoretical methods for the lowest state of each spin multiplicity, we compare the MRCI+Q and DFT/MN15 energetics. Overall, the trends are identical for both methods regarding the relative energetics of the reaction mechanisms. The two methods agree within  $\pm 15$  kcal/mol except a few cases with differences that can approach 43 kcal/mol (see Table S18). This difference is considered reasonable based on the complexity of the wavefunction of the examined transition metal systems. Conclusively, qualitative results and valuable insights can be safely deduced with our DFT/MN15 results of the bigger systems, where the multi-reference character of the wavefunction quenches.

**Table S1.** MRCI/cc-pVDZ-PP(Zr) cc-pVDZ(H) aug-cc-pVDZ(O,S) optimal geometries (Cartesian coordinates in Å) of the reactants, transition states, and products of the  $\text{ZrO}^+ + \text{H}_2\text{S} \rightarrow \text{HS-Zr}^+-\text{OH}$  reaction for the first five doublets ( $1^2\text{A}$ ,  $2^2\text{A}$ ,  $3^2\text{A}$ ,  $4^2\text{A}$ ,  $5^2\text{A}$ ) and the first two quartet ( $1^4\text{A}$ ,  $2^4\text{A}$ ).

|               | Reactants        |               |               |               | Transition State <sup>a</sup> |           |           |           | Products         |               |               |               |
|---------------|------------------|---------------|---------------|---------------|-------------------------------|-----------|-----------|-----------|------------------|---------------|---------------|---------------|
| $1^2\text{A}$ | Zr               | -0.2213530457 | -0.6508217113 | -0.1748902143 | Zr                            | 0.689613  | -0.290703 | 0.000735  | Zr               | -0.4354319013 | -0.3723800636 | 0.0000013531  |
|               | O                | -0.7723232335 | 0.8211914811  | 0.5399759631  | O                             | 0.535572  | 1.481277  | 0.007804  | O                | -1.5134069558 | 1.1702231391  | -0.0000026857 |
|               | S                | 2.5717090814  | -0.2787726420 | -0.2151464285 | S                             | -1.823562 | -0.082609 | -0.080710 | S                | 1.9119715810  | 0.2083832591  | -0.0000048410 |
|               | H                | 2.4389585208  | 1.0281819224  | 0.1032796162  | H                             | -0.757373 | 1.180166  | -0.074571 | H                | -1.9892208779 | 2.0014665110  | -0.0000054607 |
|               | H                | 2.9401749863  | -0.6487375985 | 1.0306217382  | H                             | -1.934740 | -0.080533 | 1.274099  | H                | 1.6767291540  | 1.5413131544  | 0.0000236343  |
| $2^2\text{A}$ | Zr               | -0.2526605607 | -0.6800605055 | 0.1936803775  | N/A <sup>b</sup>              |           |           |           | Zr               | -0.4076572429 | -0.1042916270 | 0.0453130413  |
|               | O                | -0.7963804664 | 0.9617673213  | 0.0619308042  |                               |           |           |           | O                | -1.8401281435 | 1.1516262847  | -0.0893715798 |
|               | S                | 2.4782165311  | -0.2237525125 | -0.1814541252 |                               |           |           |           | S                | 2.0330783409  | 0.1532326196  | 0.0174768838  |
|               | H                | 2.4544474796  | 0.9927693373  | 0.4087932666  |                               |           |           |           | H                | -2.3595891444 | 1.9561909199  | -0.0787183955 |
|               | H                | 3.0763483655  | -0.8482039545 | 0.8563273602  |                               |           |           |           | H                | 2.1335218679  | 1.2608736375  | 0.7855499097  |
| $3^2\text{A}$ | Zr               | -0.2619686897 | -0.4162798747 | 0.3684564765  | N/A <sup>b</sup>              |           |           |           | Zr               | 0.0253937900  | 0.1780488597  | -0.9201778711 |
|               | O                | -1.4066343526 | 0.8199193127  | 0.0028247279  |                               |           |           |           | O                | 0.2207806247  | 1.7671926955  | 0.1134585632  |
|               | S                | 2.6058964122  | -0.3287171350 | -0.1606210761 |                               |           |           |           | S                | -0.2611724508 | -2.1031402536 | -0.2322867758 |
|               | H                | 2.8671553490  | 0.9748565542  | 0.0816867804  |                               |           |           |           | H                | 0.2762069018  | 2.2307359679  | 0.9511800587  |
|               | H                | 3.1527175908  | -0.7787374055 | 0.9914937660  |                               |           |           |           | H                | -0.2612088660 | -2.0728372696 | 1.1178961563  |
| $4^2\text{A}$ | Zr               | -0.0736681282 | 0.1696871521  | 0.0719699194  | N/A <sup>b</sup>              |           |           |           | N/A <sup>b</sup> |               |               |               |
|               | O                | -2.0658692228 | 0.3192988174  | 0.2707243376  |                               |           |           |           |                  |               |               |               |
|               | S                | 2.8076757299  | 0.0386189291  | -0.2491800791 |                               |           |           |           |                  |               |               |               |
|               | H                | 3.1955897931  | 0.8784977987  | 0.7384426436  |                               |           |           |           |                  |               |               |               |
|               | H                | 3.0792835390  | -1.0851078245 | 0.4542876849  |                               |           |           |           |                  |               |               |               |
| $5^2\text{A}$ | N/A <sup>b</sup> |               |               |               | N/A <sup>b</sup>              |           |           |           | N/A <sup>b</sup> |               |               |               |
| $1^4\text{A}$ | Zr               | -0.4147590109 | -0.3061189306 | -0.7693761968 | Zr                            | 0.847549  | -0.189534 | 0.002436  | Zr               | 0.1351989878  | -0.0533915096 | 0.3261321386  |
|               | O                | -1.5084108005 | 0.6760291207  | 0.5810600683  | O                             | -0.138631 | 1.472751  | 0.012938  | O                | 0.4282424661  | -0.1393684540 | 2.2012230710  |
|               | S                | 2.3090153166  | 0.1815962546  | -0.4237182340 | S                             | -1.823147 | -0.317761 | -0.075280 | S                | -0.2530944215 | 0.0467132357  | -2.5628364566 |
|               | H                | 2.2305529826  | 1.4963443610  | -0.1195945059 | H                             | -1.510097 | 1.089328  | -0.239499 | H                | 0.5890043099  | -0.1910175821 | 3.1428759680  |

|                       |   |              |                  |              |   |           |                  |          |    |               |               |               |
|-----------------------|---|--------------|------------------|--------------|---|-----------|------------------|----------|----|---------------|---------------|---------------|
| <b>2<sup>4</sup>A</b> | H | 2.4627335119 | -0.2264698056    | 0.8560298685 | H | -2.112462 | -0.205797        | 1.243036 | H  | 0.6833266116  | -0.8677765673 | -2.9228782861 |
|                       |   |              | N/A <sup>b</sup> |              |   |           | N/A <sup>b</sup> |          | Zr | 0.1389523276  | -0.0526285275 | 0.3255915294  |
|                       |   |              |                  |              |   |           |                  |          | O  | 0.4285305097  | -0.1385110407 | 2.2013191145  |
|                       |   |              |                  |              |   |           |                  |          | S  | -0.2553374590 | 0.0449162970  | -2.5622999981 |
|                       |   |              |                  |              |   |           |                  |          | H  | 0.5870377987  | -0.1918074001 | 3.1432537453  |
|                       |   |              |                  |              |   |           |                  |          | H  | 0.6834947769  | -0.8668102060 | -2.9233479562 |

<sup>a</sup> Optimized at DFT/MN15 using the same basis set.

<sup>b</sup> Geometry optimization calculations failed for these structures.

**Table S2.** Harmonic vibrational frequencies (cm<sup>-1</sup>) of the optimal geometries given in Table S1.

|                       | <b>Reactants</b>                                                 | <b>Transition States<sup>b</sup></b>                               | <b>Products</b>                                                 |
|-----------------------|------------------------------------------------------------------|--------------------------------------------------------------------|-----------------------------------------------------------------|
| <b>1<sup>2</sup>A</b> | 85.5, 101.6, 211.2, 455.2, 515.1, 1001.4, 1221.7, 2753.9, 2768.4 | 1539.8i, 261.1, 269.0, 384.6, 449.2, 963.3, 1046.0, 1463.2, 2641.3 | 117.7, 130.4, 392.5, 400.6, 401.8, 452.6, 787.5, 2740.8, 3997.7 |
| <b>2<sup>2</sup>A</b> | 81.9, 116.4, 228.2, 434.3, 653.5, 986.7, 1219.7, 2763.5, 2793.5  | N/A <sup>b</sup>                                                   | 84.2, 136.5, 383.2, 434.6, 443.8, 490.2, 764.7, 2751.6, 3997.6  |
| <b>3<sup>2</sup>A</b> | 82.4, 94.8, 183.4, 421.2, 495.9, 996.7, 1218.7, 2748.4, 2766.3   | N/A <sup>b</sup>                                                   | 134.7, 387.2, 388.3, 488.7, 523.5, 575.1, 768.7, 2760.7, 3977.8 |
| <b>4<sup>2</sup>A</b> | 7.9i, 34.5, 188.8, 426.2, 476.3, 659.1, 1211.7, 2739.2, 2754.3   | N/A <sup>b</sup>                                                   | N/A <sup>b</sup>                                                |
| <b>5<sup>2</sup>A</b> | N/A <sup>b</sup>                                                 | N/A <sup>b</sup>                                                   | N/A <sup>b</sup>                                                |
| <b>1<sup>4</sup>A</b> | 59.7, 69.1, 215.1, 446.5, 521.8, 664.6, 1217.4, 2749.6, 2764.8   | 1165.0i, 193.1, 308.2, 353.4, 489.3, 644.4, 1021.6, 1800.4, 2684.9 | 37.9, 39.9, 185.1, 456.0, 490.8, 496.9, 761.2, 2722.7, 4012.5   |
| <b>2<sup>2</sup>A</b> | N/A <sup>b</sup>                                                 |                                                                    | 31.7, 43.3, 184.9, 454.8, 490.9, 497.8, 761.1, 2722.2, 4012.7   |

<sup>a</sup> Obtained at DFT/MN15; see Table S1.

<sup>b</sup> Unavailable due to technical issues; see Table S1.

**Table S3.** MRCI(+Q)/cc-pVTZ-PP(Zr) cc-pVTZ(H) aug-cc-pVTZ(O,S) electronic energies (a.u.) of optimal geometries of the fragments, reactants, transition states, and products of the  $\text{ZrO}^+ + \text{H}_2\text{S} \rightarrow \text{HS-Zr}^+-\text{OH}$  reaction for the first five doublets ( $1^2\text{A}$ ,  $2^2\text{A}$ ,  $3^2\text{A}$ ,  $4^2\text{A}$ ,  $5^2\text{A}$ ) and the first two quartets ( $1^4\text{A}$ ,  $2^4\text{A}$ ).

| State         | Fragments <sup>a</sup> |             | Reactants                |                          | Transition States        |                          | Products                 |                          |
|---------------|------------------------|-------------|--------------------------|--------------------------|--------------------------|--------------------------|--------------------------|--------------------------|
|               | MRCI                   | MRCI+Q      | MRCI                     | MRCI+Q                   | MRCI                     | MRCI+Q                   | MRCI                     | MRCI+Q                   |
| $1^2\text{A}$ | -520.226037            | -520.288207 | -520.284898              | -520.345326              | -520.230991              | -520.303657              | -520.311609              | -520.371615              |
| $2^2\text{A}$ | -520.226041            | -520.288198 | -520.284012              | -520.344455              | -520.229617 <sup>d</sup> | -520.301804 <sup>d</sup> | -520.305971              | -520.364352              |
| $3^2\text{A}$ | -520.209652            | -520.272802 | -520.260005              | -520.321561              | -520.183332 <sup>d</sup> | -520.255969 <sup>d</sup> | -520.293545              | -520.354301              |
| $4^2\text{A}$ | -520.139072            | -520.204612 | -520.154219              | -520.208784              | -520.092379 <sup>d</sup> | -520.164750 <sup>d</sup> | -520.187691 <sup>f</sup> | -520.246318 <sup>f</sup> |
| $5^2\text{A}$ | -520.139072            | -520.204612 | -520.153818 <sup>b</sup> | -520.208447 <sup>b</sup> | -520.069622 <sup>d</sup> | -520.143456 <sup>d</sup> | -520.182145 <sup>f</sup> | -520.241150 <sup>f</sup> |
| $1^4\text{A}$ | -520.111575            | -520.166846 | -520.161228              | -520.216329              | -520.137000              | -520.196987              | -520.228458              | -520.282644              |
| $2^4\text{A}$ | -520.111575            | -520.166846 | -520.148846 <sup>c</sup> | -520.203507 <sup>c</sup> | -520.127750 <sup>e</sup> | -520.187519 <sup>e</sup> | -520.227617              | -520.281992              |

<sup>a</sup> Single point energy calculations of  $\text{ZrO}^+$  and  $\text{H}_2\text{S}$  separated by a distance of 1,000 Å.

<sup>b</sup> Single point energy using the  $4^2\text{A}$  reactant structure.

<sup>c</sup> Single point energy using the  $1^4\text{A}$  reactant structure.

<sup>d</sup> Single point energy using the  $1^2\text{A}$  TS structure.

<sup>e</sup> Single point energy using the  $1^4\text{A}$  TS structure.

<sup>f</sup> Single point energy using the  $3^2\text{A}$  product structure.

**Table S4.** DFT/MN15/cc-pVTZ-PP(Zr) cc-pVTZ(H) aug-cc-pVTZ(O, S, Cl, N) optimal geometries (Cartesian coordinates in Å), harmonic vibrational frequencies (cm<sup>-1</sup>, in brackets), and energies (total electronic energy, zero-point energy, free energy correction in a.u.) of the reactants, transition states, and products of the  $\text{ZrO}^+ + \text{H}_2\text{S} \rightarrow [\text{HS-Zr-OH}]^+$  and  $\text{XZrO}^+ + \text{H}_2\text{S} \rightarrow [\text{XZr(OH)(SH)}]^+$  reactions [X = Cl<sub>2</sub>, (NH<sub>3</sub>)Cl<sub>2</sub>, (NH<sub>3</sub>)<sub>2</sub>Cl<sub>2</sub>, (NH<sub>3</sub>)<sub>3</sub>Cl<sub>2</sub>].

|                                                                                    | Reactants                                                                                                                                                                                                                                                                                                                                                                                       | Transition State                                                                                                                                                                                                                                                                                                                                                                                  | Products                                                                                                                                                                                                                                                                                                                                                                                    |
|------------------------------------------------------------------------------------|-------------------------------------------------------------------------------------------------------------------------------------------------------------------------------------------------------------------------------------------------------------------------------------------------------------------------------------------------------------------------------------------------|---------------------------------------------------------------------------------------------------------------------------------------------------------------------------------------------------------------------------------------------------------------------------------------------------------------------------------------------------------------------------------------------------|---------------------------------------------------------------------------------------------------------------------------------------------------------------------------------------------------------------------------------------------------------------------------------------------------------------------------------------------------------------------------------------------|
| <b>ZrO<sup>+</sup>+H<sub>2</sub>S</b><br>(doublet)                                 | Zr -0.685568 -0.307969 -0.000171<br>O -1.076663 1.341244 0.017167<br>S 1.992570 -0.000236 -0.055908<br>H 1.874370 1.273323 -0.451147<br>H 2.280517 0.319247 1.215166<br>(130.6, 144.3, 238.0, 395.5, 477.7, 1029.0, 1170.1, 2688.3, 2727.2)<br>-521.072095102, 0.020505, -0.010040                                                                                                              | Zr 0.686702 -0.289093 0.000786<br>O 0.537689 1.469854 0.006937<br>S -1.819113 -0.081035 -0.079571<br>H -0.744368 1.169110 -0.077114<br>H -1.919425 -0.067672 1.263298<br>(1567.2i, 251.7, 269.2, 382.1, 447.9, 966.5, 1049.4, 1479.0, 2652.5)<br>-521.040552999, 0.017083, -0.012272                                                                                                              | Zr -0.437492 -0.412500 0.000111<br>O -1.413196 1.140014 -0.000044<br>S 1.819411 0.239431 -0.000261<br>H -1.859277 1.996650 -0.000116<br>H 1.553932 1.552345 0.000189<br>(155.7, 170.3, 368.3, 427.2, 469.2, 476.1, 822.0, 2715.8, 3872.7)<br>-521.110909631, 0.021591, -0.008514                                                                                                            |
| <b>ZrO<sup>+</sup>+H<sub>2</sub>S</b><br>(quartet)                                 | Zr -0.638698 -0.361562 -0.000001<br>O -1.249058 1.477933 0.000027<br>S 1.951531 0.049589 -0.000035<br>H 2.157665 0.923114 -0.992275<br>H 2.158230 0.922463 0.992647<br>(109.9, 151.6, 233.2, 408.2, 496.0, 698.7, 1180.7, 2716.8, 2723.0)<br>-520.953169645, 0.019861, -0.011548                                                                                                                | Zr 0.844764 -0.187479 0.002364<br>O -0.141253 1.458817 0.012447<br>S -1.816877 -0.315767 -0.074424<br>H -1.495238 1.082986 -0.235099<br>H -2.095264 -0.202101 1.231755<br>(1268.3i, 193.8, 305.5, 361.4, 489.1, 643.0, 1033.5, 1773.4, 2702.9)<br>-520.942839329, 0.017092, -0.013102                                                                                                             | Zr 0.613270 -0.399631 0.004075<br>O 1.054521 1.397473 0.001807<br>S -1.995032 0.140983 -0.085758<br>H 1.303352 2.328287 -0.012422<br>H -2.349817 0.221444 1.207097<br>(92.6, 234.8, 273.3, 417.0, 484.3, 495.9, 785.9, 2675.9, 3903.9)<br>-521.018352251, 0.021332, -0.009952                                                                                                               |
| <b>(Cl)<sub>2</sub>ZrO<sup>+</sup>+H<sub>2</sub>S</b><br>(doublet)                 | Zr -0.239258 0.010865 0.261701<br>O -0.123331 -0.054580 2.190590<br>S 2.384153 -0.022233 -0.324121<br>H 2.675532 -1.257748 0.107060<br>H 2.315791 -0.369486 -1.616928<br>Cl -1.062922 -1.914663 -0.648861<br>Cl -0.853596 2.031428 -0.603901<br>(49.3, 61.4, 78.8, 88.4, 113.9, 126.0, 257.6, 428.8, 458.9, 489.8, 542.5, 691.2, 1171.1, 2708.4, 2718.8)<br>-1441.41831816, 0.022747, -0.015305 | Cl -1.899264 -1.508743 -0.205492<br>Cl -0.678993 2.221244 -0.088895<br>Zr -0.195768 -0.006783 0.023803<br>O 0.995567 -0.444892 1.494042<br>S 2.414765 -0.519022 -0.525711<br>H 2.253423 -0.734903 0.899984<br>H 2.806891 0.757212 -0.388481<br>(1266.0i, 26.5, 33.8, 93.8, 141.0, 199.5, 319.0, 336.0, 436.0, 472.2, 523.7, 642.4, 1026.9, 1716.0, 2701.6)<br>-1441.39925603, 0.019748, -0.017805 | Zr 0.186866 -0.175075 0.274484<br>O 0.227234 -0.215874 2.135649<br>S -1.414854 1.869056 -0.354981<br>H 0.339032 -0.317956 3.088538<br>H -2.318246 1.658129 0.616263<br>Cl 2.144014 0.347166 -0.799118<br>Cl -1.242580 -1.671584 -0.735567<br>(42.3, 53.7, 78.3, 97.1, 134.9, 135.9, 254.9, 383.6, 419.4, 463.0, 525.6, 538.1, 797.7, 2694.6, 3884.6)<br>-1441.48402545, 0.023929, -0.014245 |
| <b>(NH<sub>3</sub>)(Cl)<sub>2</sub>ZrO<sup>+</sup>+H<sub>2</sub>S</b><br>(doublet) | Cl -0.813986 -0.077614 2.096345<br>Cl -0.813986 -0.077614 -2.096345<br>Zr 0.102917 0.300090 0.000000<br>O 1.928203 0.981528 0.000000<br>S 0.828533 -2.371112 -0.000000<br>H 1.736035 -2.366827 0.982577<br>H 1.736035 -2.366827 -0.982577<br>N -0.813986 2.439583 0.000000<br>H -0.531372 2.977530 -0.820439<br>H -0.531372 2.977530 0.820439                                                   | Cl -0.892700 -1.911137 -1.014830<br>Cl -0.281180 2.073463 -0.983122<br>Zr -0.248046 0.017515 0.076486<br>O 0.785231 -0.160652 1.726845<br>S 2.498471 -0.344261 -0.007262<br>H 2.133107 -0.435456 1.390363<br>H 2.783193 0.962255 0.063486<br>N -2.042472 0.268974 1.500777<br>H -1.917669 1.074937 2.115990<br>H -2.143811 -0.546656 2.107725                                                     | Zr -0.244435 0.014471 0.240964<br>O -0.466303 0.292794 2.070446<br>S 2.118146 0.954162 -0.633171<br>H -0.661096 0.249120 3.013124<br>H 2.705125 0.873841 0.566967<br>Cl 1.387110 -1.701337 -0.081752<br>Cl -2.147161 -0.768152 -0.818406<br>N -0.909145 2.163605 -0.404059<br>H -1.887574 2.286653 -0.137160<br>H -0.872001 2.317110 -1.412442                                              |

|                                                                                                 |                                                                                                                                                                                                                                                                                                                                                                                                                                                                                                                                                                                                                                                                                                                                                                                                                                                                     |                                                                                                                                                                                                                                                                                                                                                                                                                                                                                                                                                                                                                                                                                                                                                                                                                                                                           |                                                                                                                                                                                                                                                                                                                                                                                                                                                                                                                                                                                                                                                                                                                                                                                                                                                                      |
|-------------------------------------------------------------------------------------------------|---------------------------------------------------------------------------------------------------------------------------------------------------------------------------------------------------------------------------------------------------------------------------------------------------------------------------------------------------------------------------------------------------------------------------------------------------------------------------------------------------------------------------------------------------------------------------------------------------------------------------------------------------------------------------------------------------------------------------------------------------------------------------------------------------------------------------------------------------------------------|---------------------------------------------------------------------------------------------------------------------------------------------------------------------------------------------------------------------------------------------------------------------------------------------------------------------------------------------------------------------------------------------------------------------------------------------------------------------------------------------------------------------------------------------------------------------------------------------------------------------------------------------------------------------------------------------------------------------------------------------------------------------------------------------------------------------------------------------------------------------------|----------------------------------------------------------------------------------------------------------------------------------------------------------------------------------------------------------------------------------------------------------------------------------------------------------------------------------------------------------------------------------------------------------------------------------------------------------------------------------------------------------------------------------------------------------------------------------------------------------------------------------------------------------------------------------------------------------------------------------------------------------------------------------------------------------------------------------------------------------------------|
|                                                                                                 | H -1.834760 2.422352 0.000000<br>(48.0, 69.7, 82.2, 91.4, 110.3, 114.2, 126.4, 138.3, 165.8, 218.9, 377.8, 399.9, 440.8, 458.5, 523.7, 614.5, 623.5, 675.8, 1181.2, 1294.7, 1610.7, 1612.6, 2730.3, 2741.8, 3452.1, 3556.7, 3557.4)<br><i>-1498.00769587, 0.061550, 0.020802</i>                                                                                                                                                                                                                                                                                                                                                                                                                                                                                                                                                                                    | H -2.937118 0.395347 1.024143<br>(1269i.1, 40.5, 52.6, 64.1, 80.8, 83.0, 93.9, 131.3, 170.3, 338.6, 359.5, 397.5, 409.7, 451.3, 498.8, 609.6, 622.0, 631.3, 1044.5, 1298.7, 1607.3, 1610.5, 1769.7, 2724.6, 3446.2, 3547.8, 3549.8)<br><i>-1498.00192562, 0.058399, 0.017478</i>                                                                                                                                                                                                                                                                                                                                                                                                                                                                                                                                                                                          | H -0.382069 2.921551 0.029221<br>(32.5, 91.8, 100.5, 110.3, 118.9, 140.4, 148.0, 167.5, 224.8, 274.4, 358.9, 387.6, 409.1, 427.8, 469.8, 511.1, 607.0, 625.4, 792.0, 1291.4, 1611.3, 1616.9, 2724.6, 3453.5, 3551.7, 3566.4, 3900.8)<br><i>-1498.06629682, 0.063138, 0.023149</i>                                                                                                                                                                                                                                                                                                                                                                                                                                                                                                                                                                                    |
| <b>(NH<sub>3</sub>)<sub>2</sub>(Cl)<sub>2</sub>ZrO<sup>+</sup>+H<sub>2</sub>S<br/>(doublet)</b> | Zr 0.000252 -0.426134 0.022641<br>O 0.001142 -2.361048 0.197970<br>S -0.001434 2.472261 -0.055280<br>H -0.995759 2.871988 -0.849764<br>H 0.994186 2.873386 -0.847432<br>Cl -2.342503 -0.093531 -0.005313<br>Cl 2.342660 -0.091105 -0.002905<br>N 0.002143 -0.532593 -2.323090<br>N -0.001869 -0.087483 2.345926<br>H -0.820934 -0.530462 2.763285<br>H -0.008480 0.887049 2.645233<br>H 0.822383 -0.519814 2.764210<br>H -0.822210 -1.039039 -2.647630<br>H 0.821156 -1.049427 -2.644808<br>H 0.008815 0.363237 -2.808151<br>(12.5, 40.3, 54.8, 71.5, 77.8, 98.2, 98.8, 105.5, 107.9, 134.5, 138.0, 167.6, 194.7, 312.4, 343.9, 373.1, 380.2, 397.5, 459.2, 578.3, 591.0, 596.6, 619.7, 671.1, 1180.1, 1266.8, 1272.2, 1611.4, 1613.4, 1615.2, 1616.4, 2750.5, 2766.5, 3457.9, 3460.0, 3564.1, 3564.8, 3570.5, 3577.2)<br><i>-1554.57643316, 0.099128, 0.052332</i> | Cl -0.222701 -2.080708 -0.950293<br>Cl -0.073537 2.145325 -0.824776<br>Zr -0.209059 -0.000307 0.122141<br>O 0.988489 -0.114683 1.688227<br>S 2.589044 -0.113020 -0.168791<br>H 2.310358 -0.300413 1.234702<br>H 2.778278 1.203985 -0.029761<br>N -1.523441 -0.038753 2.067394<br>H -1.160699 0.682720 2.692468<br>H -1.339325 -0.923715 2.542885<br>H -2.533549 0.076351 2.018977<br>N -2.435101 0.111702 -0.782750<br>H -2.284292 0.134286 -1.792691<br>H -2.965795 0.953504 -0.563627<br>H -3.029388 -0.697798 -0.610089<br>(1268.9i, 31.5, 46.8, 64.2, 96.8, 118.8, 137.6, 141.3, 150.7, 162.4, 174.1, 199.2, 309.0, 351.5, 362.1, 375.0, 392.4, 420.1, 537.8, 551.6, 573.3, 608.1, 622.4, 656.7, 1058.4, 1267.0, 1284.7, 1606.2, 1609.7, 1620.1, 1627.0, 1781.1, 2735.0, 3456.5, 3458.8, 3549.0, 3556.7, 3583.2, 3583.5)<br><i>-1554.56795802, 0.097643, 0.054780</i> | Zr -0.266125 -0.156701 0.218462<br>O -0.404915 -1.200286 1.787846<br>S 2.487589 -0.254714 0.417548<br>H -0.322925 -1.729226 2.586469<br>H 2.796065 -1.001554 -0.644754<br>Cl 0.957936 1.052451 -1.557707<br>Cl -2.452724 0.365177 -0.398042<br>N -0.260391 -2.017455 -1.212480<br>H 0.467504 -2.705548 -1.025761<br>H -0.156250 -1.717977 -2.182281<br>H -1.153805 -2.506180 -1.145437<br>N -0.038227 1.861389 1.391628<br>H -0.555814 1.869509 2.270025<br>H -0.415692 2.610618 0.810074<br>H 0.925544 2.118880 1.603319<br>(33.7, 56.5, 61.1, 79.2, 98.8, 108.5, 123.4, 126.8, 148.8, 156.8, 170.5, 187.5, 299.7, 321.2, 367.6, 377.3, 401.9, 432.7, 492.4, 537.9, 580.1, 596.9, 604.8, 611.9, 748.4, 1262.4, 1270.7, 1610.9, 1613.0, 1614.5, 1617.4, 2751.4, 3458.1, 3459.4, 3562.8, 3563.5, 3573.6, 3576.6, 3927.6)<br><i>-1554.63478226, 0.101575, 0.057489</i> |
| <b>(NH<sub>3</sub>)<sub>3</sub>(Cl)<sub>2</sub>ZrO<sup>+</sup>+H<sub>2</sub>S<br/>(doublet)</b> | Zr 0.339156 0.001471 0.124988<br>Cl -0.231874 -1.822484 -1.328063<br>Cl 0.246129 1.924059 -1.281539<br>N 1.460801 1.482159 1.654317<br>N 1.121494 -1.659581 1.686971<br>H 2.096834 -1.735636 1.963134<br>H 0.861279 -2.548814 1.259861<br>H 0.562939 -1.569987 2.534106<br>H 0.679223 1.976042 2.086206<br>H 1.984254 2.180737 1.129152<br>H 2.055566 1.150756 2.409314<br>O -1.203805 0.109822 1.155568<br>N 2.653352 -0.329732 -0.781774<br>H 3.514976 -0.184598 -0.262173<br>H 2.670275 0.323379 -1.565609<br>H 2.698047 -1.262303 -1.189738                                                                                                                                                                                                                                                                                                                     | Zr 0.179578 0.000638 0.089580<br>Cl -0.063451 -1.980709 -1.205085<br>Cl -0.289905 1.959733 -1.192396<br>N 1.557864 -1.418315 1.468635<br>N 1.409129 1.595445 1.421981<br>H 0.771055 1.818339 2.186009<br>H 1.528549 2.451417 0.882152<br>H 2.306295 1.366384 1.842182<br>H 1.316283 -2.366012 1.177992<br>H 1.249121 -1.322486 2.434864<br>H 2.572907 -1.357045 1.458810<br>O -0.844465 -0.074839 1.781823<br>N 2.253553 0.089541 -1.158098<br>H 2.744420 -0.800912 -1.210349<br>H 2.937058 0.816785 -0.960311<br>H 1.908053 0.275006 -2.101093                                                                                                                                                                                                                                                                                                                           | Cl -0.490429 -2.167225 -0.717305<br>Cl 1.551169 1.536634 -0.727337<br>Zr -0.197779 0.046063 0.191619<br>O -0.158142 0.064829 2.100362<br>S 2.331404 -0.970224 0.367824<br>H -0.072122 -0.017611 3.052251<br>H 2.760589 -0.181721 1.358350<br>N -2.524907 -0.435467 0.594288<br>H -3.043000 -0.756707 -0.220610<br>H -3.099274 0.240626 1.092182<br>H -2.440764 -1.251967 1.200131<br>N -1.029403 0.541112 -2.044796<br>H -0.332005 0.074288 -2.626280<br>H -1.017245 1.519435 -2.325672<br>H -1.924160 0.140368 -2.317413<br>N -1.178962 2.232739 0.490281                                                                                                                                                                                                                                                                                                           |

S -3.219696 0.242387 0.199311  
H -3.578948 -0.532712 1.222569  
H -2.856947 -0.789176 -0.573220  
(6, 47, 51, 56, 74, 81, 85, 94, 107, 111, 128, 134, 151, 156, 189, 277,  
281, 303, 338, 354, 369, 425, 473, 475, 480, 515, 564, 580, 597, 766,  
1183, 1217, 1223, 1238, 1606, 1616, 1620, 1627, 1630, 1640, 2712,  
2769, 3467, 3469, 3469, 3568, 3571, 3572, 3598, 3599, 3601)  
*-1611.13739367, 0.137347, 0.086643*

S -2.699267 -0.168216 0.201954  
H -2.886015 1.152277 0.295700  
H -2.223623 -0.279237 1.554541  
(1248i, 43, 68, 77, 84, 91, 113, 124, 125, 135, 150, 155, 172, 184, 189,  
296, 298, 320, 345, 353, 375, 380, 511, 519, 526, 535, 587, 606, 614,  
627, 1060, 1228, 1237, 1257, 1603, 1609, 1620, 1625, 1630, 1641, 1821,  
2740, 3464, 3465, 3466, 3564, 3569, 3571, 3595, 3595, 3596)  
*-1611.12948372, 0.135743, 0.090240*

H -0.505643 2.923027 0.159319  
H -1.277509 2.373154 1.494217  
H -2.074708 2.450877 0.061197  
(44, 46, 84, 101, 109, 130, 133, 155, 159, 166, 178, 195, 198, 213, 221,  
283, 287, 323, 335, 343, 363, 368, 393, 523, 526, 529, 547, 606, 617,  
632, 715, 1221, 1249, 1266, 1600, 1607, 1610, 1624, 1628, 1638, 2736,  
3465, 3467, 3471, 3565, 3573, 3576, 3596, 3597, 3600, 3953)  
*-1611.18490645, 0.140308, 0.094989*



**Table S5.** MRCI/cc-pVDZ-PP(Zr) cc-pVDZ(H) aug-cc-pVDZ(O) optimal geometries (Cartesian coordinates in Å) of the reactants, transition states, and products of the  $\text{ZrO}^+ + \text{H}_2\text{O} \rightarrow \text{Zr}(\text{OH})_2^+$  reaction for the first five doublets ( $1^2\text{A}$ ,  $2^2\text{A}$ ,  $3^2\text{A}$ ,  $4^2\text{A}$ ,  $5^2\text{A}$ ) and the first two quartet ( $1^4\text{A}$ ,  $2^4\text{A}$ ).

|                 | Reactants |               |               | Transition State |                  |               | Products      |               |               |               |               |               |
|-----------------|-----------|---------------|---------------|------------------|------------------|---------------|---------------|---------------|---------------|---------------|---------------|---------------|
| $1^2\text{A}$   | Zr        | -0.0470340988 | -0.7154691771 | 0.1806172035     | Zr               | 0.5854332138  | -0.0248913761 | -0.2015824080 | Zr            | -0.0009914485 | -0.0078951186 | 0.2046704547  |
|                 | O         | -0.6336052455 | 0.9173150507  | 0.0260757339     | O                | -0.3270959872 | 1.5521868093  | -0.2571262774 | O             | 0.2396656305  | 1.9254064975  | 0.2077941833  |
|                 | O         | 2.1978183312  | -0.1335438595 | 0.3384529064     | O                | -1.3385221025 | -0.3861855795 | 0.4711309862  | O             | -0.2394472107 | -1.9239816527 | 0.2041845587  |
|                 | H         | 2.4050898720  | 0.8129038634  | 0.3232693349     | H                | -1.2626745876 | 0.8200852855  | 0.1885606615  | H             | 0.3582197500  | 2.8784896880  | 0.2069274340  |
|                 | H         | 3.0348974505  | -0.6101644259 | 0.4154254960     | H                | -2.0670566076 | -0.8812677080 | 0.9078879794  | H             | -0.3574467213 | -2.8720194141 | 0.2064935007  |
| $2^2\text{A}$   | Zr        | -0.0143812382 | -0.4979971738 | -0.2416950380    | Zr               | 0.5836118398  | -0.0051523682 | -0.1658122455 | Zr            | -0.0009926016 | -0.0078982247 | 0.2046403506  |
|                 | O         | -0.9924627049 | 0.7439593756  | 0.4941141768     | O                | -0.3487983847 | 1.5551290797  | -0.2019554451 | O             | 0.2396664643  | 1.9253855359  | 0.2078967223  |
|                 | O         | 2.3279348460  | -0.1438108708 | 0.1956278991     | O                | -1.4417328044 | -0.4987078608 | 0.2885451723  | O             | -0.2394442502 | -1.9239567112 | 0.2041284630  |
|                 | H         | 2.8103623884  | 0.6288739309  | -0.1235531648    | H                | -1.2144285200 | 0.8180840067  | 0.1629570680  | H             | 0.3582151178  | 2.8784722873  | 0.2068661164  |
|                 | H         | 2.8257130182  | -0.4599838103 | 0.9593468016     | H                | -1.9885682017 | -0.7894254263 | 1.0251363920  | H             | -0.3574447303 | -2.8720028872 | 0.2065384791  |
| $3^2\text{A}$   | Zr        | 0.0360358201  | -0.3411280125 | -0.0298509745    | Zr               | 0.6013850351  | -0.0400814105 | -0.1582643155 | Zr            | 0.0022870383  | -0.0016059878 | -0.6020314148 |
|                 | O         | -1.3261522802 | 0.6625491973  | 0.2473629404     | O                | -0.3145613351 | 1.5665749600  | -0.2156060172 | O             | 0.2220245730  | 1.7722530310  | 0.0636554960  |
|                 | O         | 2.3640345457  | -0.0480474298 | 0.3058953029     | O                | -1.4469526876 | -0.4081901105 | 0.3319942573  | O             | -0.2186743884 | -1.7515372027 | 0.0986307619  |
|                 | H         | 2.8075343114  | 0.7363062196  | 0.6573485163     | H                | -1.3058583191 | 0.7724931545  | 0.1749569303  | H             | 0.3038091177  | 2.4512955220  | 0.7448509823  |
|                 | H         | 3.0615593142  | -0.6886851016 | 0.1054887214     | H                | -1.0653791324 | -0.4086648857 | 1.4688102406  | H             | -0.3094463409 | -2.4704053625 | 0.7249643060  |
| $4^2\text{A}$   | Zr        | 0.1436455304  | 0.1561063329  | 0.1903920097     | N/A <sup>b</sup> |               |               | Zr            | -0.0281778444 | -0.1842589435 | 0.0898988883  |               |
|                 | O         | -1.8479166419 | 0.3141825094  | 0.1029013277     |                  |               |               | O             | 0.2763332593  | 2.2107405359  | 0.1346165113  |               |
|                 | O         | 2.4966991785  | -0.0204955297 | 0.3056236834     |                  |               |               | O             | -0.2583865662 | -2.0614184830 | 0.1617812193  |               |
|                 | H         | 3.1259601263  | 0.6986109195  | 0.4534912256     |                  |               |               | H             | 0.4523204466  | 2.9207373941  | 0.7805557045  |               |
|                 | H         | 3.0246235178  | -0.8274093594 | 0.2338362600     |                  |               |               | H             | -0.3687928216 | -3.0090884234 | 0.2254625228  |               |
| $5^2\text{A}$   | Zr        | 0.1437831750  | 0.1560817530  | 0.1904041935     | Zr               | 0.7611197349  | -0.2237706884 | -0.2035572001 | Zr            | -0.0195620310 | -0.1900163900 | 0.1481774968  |
|                 | O         | -1.8471268521 | 0.3141559491  | 0.1029417450     | O                | -0.5036356619 | 1.5778297793  | -0.3609237932 | O             | 0.2756178625  | 2.2097577520  | 0.1330498560  |
|                 | O         | 2.4964234955  | -0.0205125879 | 0.3055903743     | O                | -1.2135207805 | -0.2954363543 | 0.5469343102  | O             | -0.2590498849 | -2.0673787693 | 0.1683563035  |
|                 | H         | 3.1255714876  | 0.6987317765  | 0.4534903224     | H                | -1.3036126353 | 0.9770524343  | 0.2126793349  | H             | 0.4511575621  | 2.9406889081  | 0.7551711568  |
|                 | H         | 3.0243604051  | -0.8274620179 | 0.2338178712     | H                | -1.3642204961 | -0.3485387144 | 1.4681181697  | H             | -0.3748670349 | -3.0163394206 | 0.1875600331  |
| $1^4\text{A}^a$ | Zr        | -0.2200301843 | 0.1268845678  | -0.2355667575    | Zr               | 0.573961      | -0.064659     | 0.001667      | Zr            | 0.1511943843  | -0.0796031939 | 0.2218965085  |
|                 | O         | -2.1577697922 | 0.3393640813  | 0.2041272113     | O                | -0.966252     | 1.233550      | 0.033157      | O             | 0.3871852436  | -0.1080455295 | 2.0977201941  |
|                 | O         | 2.1090583139  | 0.3896511332  | -0.0104269090    | O                | -1.446346     | -0.813035     | -0.087618     | O             | 0.0523812792  | -0.2053109226 | -2.2026210984 |
|                 | H         | 2.6268398268  | 1.1529733802  | -0.3001358876    | H                | -1.704966     | 0.378349      | -0.303827     | H             | 0.5411694570  | -0.1574221657 | 3.0404700934  |
|                 | H         | 2.7210338356  | -0.1874921624 | 0.4664033428     | H                | -1.952681     | -1.156088     | 0.672815      | H             | 0.4507475898  | -0.6544590656 | -2.9729492628 |

|                       |    |               |               |               |                  |    |              |               |               |
|-----------------------|----|---------------|---------------|---------------|------------------|----|--------------|---------------|---------------|
| <b>2<sup>4</sup>A</b> | Zr | -0.2172062932 | 0.1273577759  | -0.2338464641 | N/A <sup>b</sup> | Zr | 0.1537244546 | -0.0753812976 | 0.2217616070  |
|                       | O  | -2.1564447452 | 0.3389617108  | 0.2034236049  |                  | O  | 0.3856926451 | -0.1082783941 | 2.0976582086  |
|                       | O  | 2.1069968864  | 0.3900453510  | -0.0109082006 |                  | O  | 0.0497572354 | -0.2078405570 | -2.2024449640 |
|                       | H  | 2.6268253999  | 1.1524772442  | -0.3000812746 |                  | H  | 0.5414094044 | -0.1591848333 | 3.0400374818  |
|                       | H  | 2.7189607519  | -0.1874610818 | 0.4658133345  |                  | H  | 0.4520942144 | -0.6541557952 | -2.9724958985 |

<sup>a</sup> The transition state is optimized at DFT/MN15 using the same basis set.

<sup>b</sup> Geometry optimization calculations failed for these structures.

**Table S6.** Harmonic vibrational frequencies (cm<sup>-1</sup>) of the optimal geometries given in Table S5.

|                                    | <b>Reactants</b>                                                  | <b>Transition States</b>                                             | <b>Products</b>                                                 |
|------------------------------------|-------------------------------------------------------------------|----------------------------------------------------------------------|-----------------------------------------------------------------|
| <b>1<sup>2</sup>A</b>              | 119.0, 235.2, 382.8, 384.9, 555.1, 958.1, 1694.4, 3922.7, 3963.6  | 1856.0i, 437.7, 611.0, 703.2, 855.3, 932.9, 1087.8, 1951.0, 3656.0   | 49.9, 519.7, 529.4, 533.8, 580.8, 725.0, 768.6, 3999.3, 4029.3  |
| <b>2<sup>2</sup>A</b>              | 68.4, 77.2, 337.8, 401.8, 572.4, 864.0, 1721.2, 3948.5, 3950.6    | 1631.5i, 414.0, 549.0, 674.5, 845.0, 1002.8, 1182.9, 2007.7, 3940.0  | 49.8, 512.5, 529.5, 534.2, 581.2, 725.2, 768.6, 3999.3, 4029.3  |
| <b>3<sup>2</sup>A</b>              | 217.0, 264.2, 367.6, 436.2, 539.2, 1622.1, 1707.9, 3905.8, 3927.8 | 1530.9i, 469.8, 656.9, 827.7, 1058.1, 1169.5, 1537.7, 1686.2, 1829.9 | 169.3, 510.3, 534.4, 572.0, 590.6, 762.1, 796.2, 3948.8, 3996.6 |
| <b>4<sup>2</sup>A</b>              | 33.6, 47.1, 359.9, 407.2, 503.8, 693.7, 1705.6, 3892.1, 3916.1    | N/A <sup>b</sup>                                                     | 60.4, 94.0, 295.3, 370.6, 486.4, 491.6, 773.1, 3768.6, 4018.9   |
| <b>5<sup>2</sup>A</b>              | 26.4, 54.4, 360.2, 407.9, 504.3, 699.7, 1706.5, 3891.4, 3916.0    | N/A <sup>b</sup>                                                     | 97.4, 113.3, 292.8, 367.4, 487.9, 490.1, 773.0, 3769.8, 4019.0  |
| <b>1<sup>4</sup>A</b> <sup>a</sup> | 18.2, 51.0, 363.6, 404.3, 502.0, 680.6, 1703.0, 3891.4, 3917.4    | 1813.6i, 282.7, 505.0, 557.2, 612.4, 650.7, 1127.0, 1855.1, 3784.0   | 56.5, 88.4, 282.3, 330.5, 483.3, 484.2, 777.5, 3769.3, 4015.1   |
| <b>2<sup>2</sup>A</b>              | 27.1, 30.4, 365.1, 402.7, 521.7, 680.0, 1706.4, 3892.3, 3915.1    | N/A <sup>b</sup>                                                     | 62.0, 102.8, 283.6, 331.7, 481.6, 486.3, 778.1, 3767.8, 4015.2  |

<sup>a</sup> The transition state is obtained at DFT/MN15; see Table S5.

<sup>b</sup> Unavailable due to technical issues; see Table S5.

**Table S7.** MRCI(+Q)/cc-pVTZ-PP(Zr) cc-pVTZ(H) aug-cc-pVTZ(O) electronic energies (a.u.) of optimal geometries of the fragments, reactants, transition states, and products of the  $\text{ZrO}^+ + \text{H}_2\text{O} \rightarrow \text{Zr}(\text{OH})_2^+$  reaction for the first five doublets ( $1^2\text{A}$ ,  $2^2\text{A}$ ,  $3^2\text{A}$ ,  $4^2\text{A}$ ,  $5^2\text{A}$ ) and the first two quartets ( $1^4\text{A}$ ,  $2^4\text{A}$ ).

| State         | Fragments <sup>a</sup> |             | Intermediate |             | Transition States        |                          | Products    |             |
|---------------|------------------------|-------------|--------------|-------------|--------------------------|--------------------------|-------------|-------------|
|               | MRCI                   | MRCI+Q      | MRCI         | MRCI+Q      | MRCI                     | MRCI+Q                   | MRCI        | MRCI+Q      |
| $1^2\text{A}$ | -197.634790            | -197.691874 | -197.700516  | -197.756748 | -197.655033              | -197.714258              | -197.733647 | -197.787947 |
| $2^2\text{A}$ | -197.634629            | -197.691554 | -197.696813  | -197.752303 | -197.642968              | -197.701006              | -197.733658 | -197.787966 |
| $3^2\text{A}$ | -197.618552            | -197.676434 | -197.675520  | -197.734469 | -197.562254              | -197.622986              | -197.709856 | -197.769949 |
| $4^2\text{A}$ | -197.544412            | -197.606380 | -197.581322  | -197.630002 | -197.524073 <sup>b</sup> | -197.575686 <sup>b</sup> | -197.583847 | -197.636545 |
| $5^2\text{A}$ | -197.539172            | -197.602170 | -197.581355  | -197.630071 | -197.516347              | -197.571010              | -197.583836 | -197.636535 |
| $1^4\text{A}$ | -197.519973            | -197.569085 | -197.585800  | -197.633099 | -197.529436 <sup>c</sup> | -197.585893 <sup>c</sup> | -197.590023 | -197.639035 |
| $2^4\text{A}$ | -197.520136            | -197.569236 | -197.585064  | -197.632503 | -197.500111 <sup>c</sup> | -197.551590 <sup>c</sup> | -197.590024 | -197.639042 |

<sup>a</sup> Single point energy calculations of  $\text{ZrO}^+$  and  $\text{H}_2\text{O}$  separated by a distance of 1,000 Å.

<sup>b</sup> Single point energy using the  $5^2\text{A}$  TS structure.

<sup>c</sup> Single point energy using the  $1^4\text{A}$  TS structure.

**Table S8.** DFT/MN15/cc-pVTZ-PP(Zr) cc-pVTZ(H) aug-cc-pVTZ(O, Cl, N) optimal geometries (Cartesian coordinates in Å), harmonic vibrational frequencies (cm<sup>-1</sup>, in brackets), and energies (total electronic energy, zero-point energy, free energy correction in a.u.) of the reactants, transition state, and products of the  $\text{ZrO}^+ + \text{H}_2\text{O} \rightarrow [\text{HO-Zr-OH}]^+$  and  $\text{XZrO}^+ + \text{H}_2\text{O} \rightarrow [\text{XZr}(\text{OH})_2]^+$  reactions [X = Cl<sub>2</sub>, (NH<sub>3</sub>)Cl<sub>2</sub>, (NH<sub>3</sub>)<sub>2</sub>Cl<sub>2</sub>, (NH<sub>3</sub>)<sub>3</sub>Cl<sub>2</sub>].

|                                                                                    | Reactants                                                                                                                                                                                                                                                                                                                                                                                        | Transition State                                                                                                                                                                                                                                                                                                                                                                                   | Products                                                                                                                                                                                                                                                                                                                                                                                               |
|------------------------------------------------------------------------------------|--------------------------------------------------------------------------------------------------------------------------------------------------------------------------------------------------------------------------------------------------------------------------------------------------------------------------------------------------------------------------------------------------|----------------------------------------------------------------------------------------------------------------------------------------------------------------------------------------------------------------------------------------------------------------------------------------------------------------------------------------------------------------------------------------------------|--------------------------------------------------------------------------------------------------------------------------------------------------------------------------------------------------------------------------------------------------------------------------------------------------------------------------------------------------------------------------------------------------------|
| <b>ZrO<sup>+</sup>+H<sub>2</sub>O</b><br>(doublet)                                 | Zr 0.316235 -0.320591 -0.000031<br>O 0.813699 1.298439 0.000079<br>O -1.812766 0.198137 0.000057<br>H -2.011992 1.149180 -0.000014<br>H -2.644874 -0.298134 0.000159<br>(155.4, 292.4, 405.1, 427.8, 557.4, 1040.1, 1600.1, 3765.5, 3858.2)<br><i>-198.184465583, 0.027570, -0.001273</i>                                                                                                        | Zr 0.437851 -0.215448 -0.000001<br>O -0.156254 1.449339 0.000007<br>O -1.567509 -0.379762 0.000016<br>H -1.270862 0.823284 -0.000099<br>H -2.453056 -0.761961 -0.000045<br>(1817.1i, 319.8, 407.0, 616.5, 738.1, 962.8, 989.9, 1937.6, 3881.8)<br><i>-198.147850031, 0.022448, -0.005498</i>                                                                                                       | Zr -0.000000 0.350497 -0.000026<br>O -1.520663 -0.698712 0.000101<br>O 1.520662 -0.698713 0.000002<br>H -2.161396 -1.420240 0.000188<br>H 2.161415 -1.420223 0.000042<br>(176.5, 435.5, 502.3, 515.9, 522.1, 800.8, 815.7, 3879.7, 3888.5)<br><i>-198.230895041, 0.026283, -0.002150</i>                                                                                                               |
| <b>ZrO<sup>+</sup>+H<sub>2</sub>O</b><br>(Quartet)                                 | Zr -0.246647 -0.377833 -0.000001<br>O -1.149249 1.340160 -0.000015<br>O 1.807542 0.382688 -0.000041<br>H 2.300200 0.665312 -0.787236<br>H 2.299334 0.665246 0.787724<br>(63.7, 307.3, 405.7, 467.4, 540.1, 696.0, 1608.2, 3753.7, 3834.5)<br><i>-198.058654975, 0.026601, -0.003712</i>                                                                                                          | Zr 0.571984 -0.067099 0.001742<br>O -0.948750 1.230065 0.031820<br>O -1.453938 -0.803556 -0.088804<br>H -1.701115 0.391466 -0.295801<br>H -1.956749 -1.119582 0.681976<br>(1823.1i, 282.2, 502.1, 564.5, 603.1, 652.6, 1124.0, 1876.3, 3770.2)<br><i>-198.021359253, 0.021358, -0.007448</i>                                                                                                       | Zr -0.271041 -0.408800 0.005503<br>O 1.918928 0.291480 -0.101550<br>O -0.741626 1.381022 -0.002350<br>H 2.437450 0.666694 0.644453<br>H -1.014236 2.305299 -0.033364<br>(69.2, 316.8, 337.3, 414.6, 478.8, 502.3, 782.8, 3669.9, 3896.9)<br><i>-198.061145047, 0.023849, -0.006601</i>                                                                                                                 |
| <b>(Cl)<sub>2</sub>ZrO<sup>+</sup>+H<sub>2</sub>O</b><br>(doublet)                 | Zr 0.000009 0.137285 -0.131753<br>O 0.000385 0.997389 -1.862195<br>O -0.000569 1.939782 1.126374<br>H -0.001965 2.840943 0.762008<br>H 0.000515 2.002048 2.095767<br>Cl -1.944746 -0.995246 0.243924<br>Cl 1.944897 -0.994858 0.244247<br>(61.0, 70.5, 87.8, 98.9, 105.1, 163.4, 407.5, 421.1, 440.8, 477.6, 579.5, 691.6, 1615.8, 3752.0, 3830.1)<br><i>-1118.52945871, 0.029166, -0.007664</i> | Cl -1.930881 -1.099009 0.033825<br>Cl 1.930743 -1.099223 0.033842<br>Zr -0.000001 0.094121 -0.049839<br>O 0.000161 1.865718 -1.217863<br>O 0.000109 1.770757 1.086403<br>H 0.000165 2.275256 -0.037977<br>H 0.000066 2.238046 1.932875<br>(1484.6i, 49.0, 83.7, 93.9, 115.6, 349.3, 395.7, 465.4, 482.6, 556.2, 687.3, 723.8, 765.9, 1823.1, 3850.7)<br><i>-1118.49116531, 0.023789, -0.011580</i> | Zr -0.145306 0.278449 0.036858<br>O -0.393521 2.063717 -0.418841<br>O 1.008049 -0.069152 1.580227<br>H -0.583704 2.988254 -0.618513<br>H 1.661326 -0.151148 2.290792<br>Cl -2.020443 -1.033719 -0.101908<br>Cl 2.009760 -0.726962 -0.629721<br>(57.0, 77.3, 120.2, 145.4, 189.7, 214.2, 262.5, 398.4, 451.2, 500.6, 549.7, 635.8, 806.3, 3839.5, 3885.7)<br><i>-1118.54665309, 0.027642, -0.008299</i> |
| <b>(NH<sub>3</sub>)(Cl)<sub>2</sub>ZrO<sup>+</sup>+H<sub>2</sub>O</b><br>(doublet) | Zr -0.024949 -0.042560 0.199988<br>O -0.254102 -0.309841 2.129100<br>O 0.630968 -2.191901 0.146715<br>H 0.373413 -2.857945 0.801217<br>H 1.261581 -2.580727 -0.477027<br>Cl -1.967194 -0.251772 -1.024439<br>Cl 1.999350 0.470004 -0.827064<br>N -0.401561 2.231572 0.480672<br>H -0.410693 2.731133 -0.409462<br>H 0.318677 2.671867 1.054680                                                   | Cl 1.920109 -1.012558 -0.542489<br>Cl -1.918237 -1.016173 -0.541997<br>Zr -0.000088 0.127542 -0.032505<br>O -0.002153 2.020140 1.075409<br>O -0.002082 1.838092 -1.184043<br>H -0.002474 2.382063 -0.111004<br>H -0.003201 2.247573 -2.058194<br>N 0.001065 -0.577500 2.167087<br>H 0.001916 -1.595352 2.252157<br>H -0.815560 -0.236089 2.676735                                                  | Zr -0.128798 -0.064593 0.259542<br>O -0.486578 0.350501 2.044722<br>O 1.000215 -1.724943 0.197647<br>H -0.704466 0.427581 2.979381<br>H 1.675393 -2.412049 0.106611<br>Cl -2.051389 -0.561377 -0.927150<br>Cl 2.214282 0.148581 -0.636826<br>N -0.257997 2.149028 -0.447200<br>H 0.432514 2.760874 -0.011482<br>H -1.178575 2.528676 -0.220421                                                         |

|                                                                                                 |                                                                                                                                                                                                                                                                                                                                                                                                                                                                                                                                                                                                                                                                                                                                                                                                                                                                 |                                                                                                                                                                                                                                                                                                                                                                                                                                                                                                                                                                                                                                                                                                                                                                                                                                                                        |                                                                                                                                                                                                                                                                                                                                                                                                                                                                                                                                                                                                                                                                                                                                                                                                                                                              |
|-------------------------------------------------------------------------------------------------|-----------------------------------------------------------------------------------------------------------------------------------------------------------------------------------------------------------------------------------------------------------------------------------------------------------------------------------------------------------------------------------------------------------------------------------------------------------------------------------------------------------------------------------------------------------------------------------------------------------------------------------------------------------------------------------------------------------------------------------------------------------------------------------------------------------------------------------------------------------------|------------------------------------------------------------------------------------------------------------------------------------------------------------------------------------------------------------------------------------------------------------------------------------------------------------------------------------------------------------------------------------------------------------------------------------------------------------------------------------------------------------------------------------------------------------------------------------------------------------------------------------------------------------------------------------------------------------------------------------------------------------------------------------------------------------------------------------------------------------------------|--------------------------------------------------------------------------------------------------------------------------------------------------------------------------------------------------------------------------------------------------------------------------------------------------------------------------------------------------------------------------------------------------------------------------------------------------------------------------------------------------------------------------------------------------------------------------------------------------------------------------------------------------------------------------------------------------------------------------------------------------------------------------------------------------------------------------------------------------------------|
|                                                                                                 | H -1.295693 2.421064 0.935402<br>(49.1, 63.8, 82.9, 97.8, 111.8, 116.7, 130.2, 150.2, 237.8, 350.4, 357.5, 389.8, 403.9, 446.1, 545.1, 618.6, 620.0, 666.1, 1295.9, 1595.1, 1610.7, 1611.8, 3453.4, 3557.9, 3558.9, 3786.6, 3880.0)<br><i>-1175.11826557, 0.067862, 0.027992</i>                                                                                                                                                                                                                                                                                                                                                                                                                                                                                                                                                                                | H 0.817459 -0.234774 2.676230<br>(1263.9i, 43.6, 86.5, 90.5, 107.8, 108.2, 111.9, 149.4, 314.0, 382.2, 406.6, 455.3, 460.7, 521.3, 594.1, 649.7, 657.0, 670.4, 781.4, 1303.5, 1608.0, 1609.1, 1829.3, 3448.1, 3550.3, 3553.0, 3869.5)<br><i>-1175.08963437, 0.062334, 0.023733</i>                                                                                                                                                                                                                                                                                                                                                                                                                                                                                                                                                                                     | H -0.145259 2.248484 -1.456716<br>(43.4, 95.3, 102.7, 111.1, 123.8, 133.9, 140.0, 157.4, 237.4, 298.7, 382.8, 388.2, 428.6, 462.0, 501.6, 590.4, 618.5, 637.5, 789.5, 1291.6, 1612.4, 1614.8, 3454.2, 3555.6, 3563.0, 3855.3, 3911.3)<br><i>-1175.13716898, 0.066296, 0.027084</i>                                                                                                                                                                                                                                                                                                                                                                                                                                                                                                                                                                           |
| <b>(NH<sub>3</sub>)<sub>2</sub>(Cl)<sub>2</sub>ZrO<sup>+</sup>+H<sub>2</sub>O<br/>(doublet)</b> | Zr -0.079069 -0.000476 0.135437<br>O -0.420673 0.046512 2.077563<br>O 0.366219 -2.193726 0.387866<br>H -0.034040 -2.757774 1.065434<br>H 0.731645 -2.738704 -0.324641<br>Cl -2.307406 -0.242865 -0.506081<br>Cl 1.484547 -0.165921 -1.667611<br>N -0.331153 2.287987 -0.254250<br>H -0.703687 2.411269 -1.196966<br>H 0.509065 2.861092 -0.198668<br>H -1.018032 2.687764 0.385931<br>N 1.943379 0.553266 1.333205<br>H 2.441156 -0.323778 1.485769<br>H 1.800068 0.975307 2.249347<br>H 2.575230 1.142182 0.792955<br>(56.0, 64.5, 70.0, 85.3, 95.5, 98.9, 116.6, 123.0, 139.2, 141.2, 196.4, 317.2, 342.0, 344.6, 373.4, 377.5, 394.5, 421.2, 529.8, 547.2, 582.5, 596.5, 615.2, 670.3, 1237.7, 1278.1, 1575.6, 1606.9, 1610.9, 1617.1, 1621.7, 3458.9, 3463.9, 3558.3, 3570.5, 3578.3, 358 6.2, 3785.1, 3884.8)<br><i>-1231.68466239, 0.106464, 0.063612</i> | Cl -2.149849 0.025283 -0.804451<br>Cl 2.150079 0.028219 -0.803839<br>Zr -0.000019 0.000161 0.128366<br>O -0.002569 1.156278 1.996441<br>O 0.001426 -1.095729 1.917943<br>H -0.000371 -0.005764 2.408584<br>H 0.002578 -1.936370 2.387547<br>N -0.001206 2.233501 -0.573579<br>H -0.000928 2.334554 -1.588138<br>H 0.819806 2.726199 -0.222965<br>H -0.823120 2.725030 -0.223442<br>N 0.001574 -2.184688 -0.738464<br>H 0.828342 -2.713682 -0.463682<br>H 0.001732 -2.157284 -1.758410<br>H -0.824609 -2.714742 -0.463957<br>(1165.6i, 1.2, 63.1, 97.6, 123.2, 137.4, 142.3, 148.3, 155.7, 173.8, 182.5, 252.1, 329.1, 369.0, 391.5, 414.6, 449.8, 511.3, 571.1, 571.3, 625.5, 634.3, 664.1, 688.4, 789.0, 1271.6, 1280.0, 1610.5, 1611.0, 1613.0, 1618.8, 1835.7, 3460.7, 3461.9, 3566.1, 3573.5, 3573.5, 3580.4, 3899.3)<br><i>-1231.66232867, 0.101247, 0.057059</i> | Zr 0.446825 -0.198106 -0.173530<br>O 1.603314 -1.627274 0.290935<br>O 0.788104 0.134487 -2.002097<br>H 2.164073 -2.405804 0.338207<br>H 0.925251 0.260740 -2.944399<br>Cl -1.865905 -1.140261 -0.192786<br>Cl -1.571228 1.471262 -0.028834<br>N 0.046719 -0.123564 2.231456<br>H 0.872390 -0.097185 2.825982<br>H -0.417610 -1.008598 2.436068<br>H -0.590136 0.609000 2.539884<br>N 1.751075 1.681463 0.344416<br>H 1.792802 2.249221 -0.501972<br>H 2.712673 1.448263 0.590479<br>H 1.382919 2.278566 1.082660<br>(39.6, 52.1, 80.6, 94.4, 105.0, 135.6, 140.8, 149.6, 170.0, 190.4, 212.3, 224.6, 297.7, 333.3, 356.1, 370.8, 411.1, 492.0, 504.5, 542.3, 558.7, 595.1, 611.6, 741.5, 755.7, 1245.3, 1260.3, 1609.8, 1617.6, 1624.1, 1630.7, 3467.7, 3469.3, 3570.8, 3570.9, 3583.5, 3592.8, 3936.2, 3942.0)<br><i>-1231.71207940, 0.105448, 0.063024</i> |
| <b>(NH<sub>3</sub>)<sub>3</sub>(Cl)<sub>2</sub>ZrO<sup>+</sup>+H<sub>2</sub>O<br/>(doublet)</b> | Cl 2.186288 -0.528301 0.662203<br>Cl -1.672375 -1.426892 0.763934<br>Zr -0.022756 0.027574 -0.165317<br>O -0.497227 0.389688 -2.074516<br>O 0.611550 -1.739696 -1.430628<br>H 0.055413 -2.177575 -2.088952<br>H 1.365989 -2.292607 -1.182363<br>N 1.103162 2.140128 -0.443453<br>H 0.578350 3.011088 -0.416377<br>H 1.488387 2.072174 -1.385984<br>H 1.896645 2.227127 0.189194<br>N -0.184343 0.895934 2.075588<br>H 0.256019 0.146346 2.611211<br>H -1.139853 0.964167 2.420462<br>H 0.308048 1.750147 2.327251<br>N -1.900683 1.543670 -0.332901                                                                                                                                                                                                                                                                                                             | Cl -2.058223 -0.805224 -0.763077<br>Cl 1.899451 -1.139387 -0.751571<br>Zr 0.014386 0.002224 0.115231<br>O 0.023648 0.221905 2.173867<br>O -0.221244 -1.735187 1.502034<br>H 0.088946 -0.920432 2.361990<br>H -1.128344 -2.062067 1.630365<br>N -1.313079 1.995955 0.405373<br>H -0.953975 2.914106 0.155442<br>H -1.539410 2.023477 1.399667<br>H -2.194173 1.865031 -0.090188<br>N 0.107523 0.938829 -2.103747<br>H -0.064024 0.106230 -2.669995<br>H 1.015142 1.291855 -2.400760<br>H -0.603165 1.613905 -2.377907<br>N 1.663187 1.704049 0.532014                                                                                                                                                                                                                                                                                                                   | Cl -1.981678 -1.200362 -0.368923<br>Cl 2.011549 -1.083848 -0.494489<br>Zr -0.012769 0.036524 0.140726<br>O 0.212835 0.869012 1.984192<br>O 0.071931 -1.297636 1.840368<br>H -0.151375 0.741378 2.869309<br>H 0.971012 -1.558901 2.117413<br>N -1.594014 1.846815 0.003068<br>H -1.858343 2.192170 -0.916750<br>H -1.328761 2.648246 0.572014<br>H -2.446015 1.459648 0.409816<br>N -0.104584 0.223737 -2.277241<br>H -0.013859 -0.758205 -2.542189<br>H 0.652044 0.711269 -2.752200<br>H -0.987396 0.535190 -2.677064<br>N 1.399207 1.952911 -0.266700                                                                                                                                                                                                                                                                                                       |

|                                                                                                   |                                                                                                                                                                                                                                                                                                                                                                                                                                                                                                                                                                                                                                                                                                                                                                                                                                                                                                                                                                                                                                                                                                                                                                                                                                                                                                                                                                                    |                                                                                                                                                                                                                                                                                                                                                                                                                                                                                                                                                                                                                                                                                                                                                                                                                                                                                                                                                                                                                                                                                                                                                                                                                                                                                                                                                                                    |                                                                                                                                                                                                                                                                                                                                                                                                                                                                                                                                                                                                                                                                                                                                                                                                                                                                                                                                                                                                                                                                                                                                                                                                                                                                                                                                                                                  |
|---------------------------------------------------------------------------------------------------|------------------------------------------------------------------------------------------------------------------------------------------------------------------------------------------------------------------------------------------------------------------------------------------------------------------------------------------------------------------------------------------------------------------------------------------------------------------------------------------------------------------------------------------------------------------------------------------------------------------------------------------------------------------------------------------------------------------------------------------------------------------------------------------------------------------------------------------------------------------------------------------------------------------------------------------------------------------------------------------------------------------------------------------------------------------------------------------------------------------------------------------------------------------------------------------------------------------------------------------------------------------------------------------------------------------------------------------------------------------------------------|------------------------------------------------------------------------------------------------------------------------------------------------------------------------------------------------------------------------------------------------------------------------------------------------------------------------------------------------------------------------------------------------------------------------------------------------------------------------------------------------------------------------------------------------------------------------------------------------------------------------------------------------------------------------------------------------------------------------------------------------------------------------------------------------------------------------------------------------------------------------------------------------------------------------------------------------------------------------------------------------------------------------------------------------------------------------------------------------------------------------------------------------------------------------------------------------------------------------------------------------------------------------------------------------------------------------------------------------------------------------------------|----------------------------------------------------------------------------------------------------------------------------------------------------------------------------------------------------------------------------------------------------------------------------------------------------------------------------------------------------------------------------------------------------------------------------------------------------------------------------------------------------------------------------------------------------------------------------------------------------------------------------------------------------------------------------------------------------------------------------------------------------------------------------------------------------------------------------------------------------------------------------------------------------------------------------------------------------------------------------------------------------------------------------------------------------------------------------------------------------------------------------------------------------------------------------------------------------------------------------------------------------------------------------------------------------------------------------------------------------------------------------------|
|                                                                                                   | <p>H -2.709566 0.941034 -0.179449<br/> H -1.981086 1.903038 -1.283974<br/> H -1.986169 2.332338 0.303836<br/> (38.2, 60.4, 73.3, 97.8, 104.5, 131.4, 141.0, 160.2, 166.1, 174.4, 186.7, 188.2, 204.0, 228.0, 270.7, 297.8, 305.3, 307.1, 313.4, 356.9, 372.0, 379.1, 523.9, 530.9, 539.9, 558.9, 594.6, 625.9, 636.5, 657.8, 1233.3, 1245.3, 1262.5, 1554.2, 1601.2, 1609.6, 1616.7, 1623.8, 1626.9, 1634.5, 3457.2, 3464.3, 3466.3, 3561.1, 3564.7, 3569.7, 3589.8, 3594.7, 3595.1, 3791.1, 3904.2)<br/> -1288.24137434, 0.145327, 0.100697</p>                                                                                                                                                                                                                                                                                                                                                                                                                                                                                                                                                                                                                                                                                                                                                                                                                                   | <p>H 1.901466 2.364085 -0.204730<br/> H 2.510997 1.166992 0.717993<br/> H 1.467565 2.240667 1.375213<br/> (1799.1i, 47.9, 72.6, 80.5, 86.5, 109.2, 140.2, 144.5, 156.1, 163.5, 165.6, 183.8, 193.9, 199.0, 279.3, 298.6, 302.7, 352.0, 365.1, 381.7, 481.8, 528.6, 533.6, 552.1, 579.0, 603.5, 620.1, 626.0, 636.4, 659.0, 1109.1, 1235.9, 1251.9, 1271.1, 1604.4, 1605.9, 1620.6, 1625.5, 1627.9, 1641.4, 1908.1, 3463.4, 3464.5, 3465.8, 3561.7, 3567.9, 3568.5, 3592.4, 3592.9, 3593.9, 3778.9)<br/> -1288.21281567, 0.140551, 0.097010</p>                                                                                                                                                                                                                                                                                                                                                                                                                                                                                                                                                                                                                                                                                                                                                                                                                                     | <p>H 2.255654 1.622654 -0.709817<br/> H 1.658430 2.284684 0.662280<br/> H 1.069176 2.757240 -0.794225<br/> (41.6, 70.4, 80.4, 89.2, 112.5, 145.1, 148.9, 155.8, 162.3, 169.8, 176.1, 195.5, 204.4, 277.5, 292.9, 302.6, 315.4, 356.5, 364.4, 376.6, 397.9, 451.9, 523.3, 531.0, 535.8, 566.9, 603.5, 617.3, 631.3, 633.6, 651.7, 1230.0, 1245.2, 1268.1, 1602.5, 1606.0, 1619.0, 1625.3, 1628.8, 1640.2, 3464.1, 3465.2, 3468.1, 3564.0, 3570.2, 3571.7, 3594.4, 3595.0, 3596.5, 3743.6, 3871.6)<br/> -1288.23706860, 0.143870, 0.099859</p>                                                                                                                                                                                                                                                                                                                                                                                                                                                                                                                                                                                                                                                                                                                                                                                                                                     |
| (NH <sub>3</sub> ) <sub>4</sub> (Cl) <sub>2</sub> ZrO <sup>+</sup> +H <sub>2</sub> O<br>(doublet) | <p>Cl 2.386856 -0.567652 0.219138<br/> Cl -2.358160 -0.661298 0.148509<br/> Zr 0.029226 0.065746 -0.109534<br/> O 0.088166 0.707807 -2.011138<br/> O -1.418869 2.023644 -0.200281<br/> H -1.409532 2.320736 -1.123576<br/> H -2.300227 1.631091 -0.061409<br/> N 1.306626 2.116770 -0.122670<br/> H 2.051661 2.090624 0.570300<br/> H 0.814368 3.003666 -0.045344<br/> H 1.771520 2.091690 -1.030202<br/> N 0.076798 -1.965144 1.272296<br/> H -0.848028 -2.316348 1.515080<br/> H 0.609415 -1.814892 2.126881<br/> H 0.584909 -2.700956 0.786252<br/> N -0.191107 0.884881 2.132838<br/> H -0.952449 0.392115 2.598235<br/> H -0.443294 1.871501 2.129524<br/> H 0.647071 0.781240 2.702312<br/> N 0.012407 -1.740836 -1.656886<br/> H -0.204777 -1.390028 -2.589631<br/> H -0.694332 -2.437263 -1.428137<br/> H 0.929388 -2.182171 -1.706623<br/> (72.3, 80.2, 106.7, 110.3, 127.5, 141.4, 147.0, 154.7, 168.5, 177.2, 182.0, 191.2, 192.2, 206.9, 215.6, 233.7, 244.9, 265.2, 273.5, 295.6, 306.5, 314.3, 336.5, 349.3, 360.5, 494.7, 504.0, 531.5, 566.9, 586.0, 596.2, 606.6, 613.6, 652.8, 664.2, 675.4, 1213.2, 1218.2, 1229.5, 1238.5, 1598.0, 1601.2, 1609.1, 1610.7, 1613.7, 1625.6, 1630.8, 1634.8, 1641.4, 3455.2, 3464.5, 3465.3, 3466.4, 3566.1, 3574.1, 3578.4, 3585.3, 3586.9, 3591.0, 3591.6, 3598.9, 3694.7, 3820.1)<br/> -1344.79039385, 0.185099, 0.139985</p> | <p>Cl 2.342158 -0.637865 0.037371<br/> Cl -2.390074 -0.641337 0.017877<br/> Zr -0.038800 0.065268 -0.050588<br/> O 0.007238 0.951846 -1.935009<br/> O 1.137552 2.008556 -0.518262<br/> H 2.054289 1.743342 -0.715837<br/> H 0.520863 1.922567 -1.575248<br/> N 0.551122 0.838846 2.126172<br/> H 1.320801 0.266415 2.470582<br/> H -0.164262 0.881284 2.849279<br/> H 0.927222 1.779120 2.011578<br/> N -0.092588 -1.917015 1.365840<br/> H -0.585991 -2.649992 0.860299<br/> H -0.628932 -1.788318 2.221742<br/> H 0.834697 -2.263357 1.606871<br/> N -1.376716 2.039665 0.335005<br/> H -1.905410 2.119052 -0.533302<br/> H -0.869050 2.912802 0.462947<br/> H -2.074202 1.944659 1.069656<br/> N 0.012641 -1.740680 -1.600084<br/> H 0.386675 -1.339811 -2.459281<br/> H -0.908331 -2.121967 -1.808619<br/> H 0.638676 -2.498997 -1.338717<br/> (1680.1i, 52.8, 79.7, 94.4, 117.0, 143.0, 155.1, 162.6, 171.6, 180.6, 188.8, 195.7, 196.4, 208.3, 220.0, 234.5, 240.5, 274.4, 282.9, 293.8, 310.3, 341.7, 350.1, 362.6, 468.1, 511.0, 521.8, 573.7, 591.9, 596.6, 603.3, 623.3, 637.6, 656.0, 664.2, 724.1, 1148.6, 1221.9, 1230.3, 1236.3, 1250.3, 1596.9, 1604.0, 1608.3, 1615.2, 1625.6, 1626.3, 1637.8, 1644.1, 1906.6, 3464.6, 3465.5, 3466.5, 3467.0, 3574.2, 3575.9, 3580.4, 3584.2, 3587.4, 3589.5, 3596.3, 3597.9, 3738.5)<br/> -1344.76702855, 0.180587, 0.136294</p> | <p>Cl 2.408260 -0.418353 0.048481<br/> Cl -2.304540 -0.869557 0.035896<br/> Zr -0.029283 0.090729 -0.062964<br/> O -0.063378 0.943172 -1.944839<br/> O 0.916741 2.055483 -0.400688<br/> H 1.812146 1.892441 -0.751826<br/> H -0.252140 1.801876 -2.343513<br/> N 0.407424 0.835676 2.160497<br/> H 1.272622 0.384867 2.457052<br/> H -0.295327 0.683785 2.881157<br/> H 0.604298 1.834678 2.127803<br/> N 0.111303 -1.916126 1.335642<br/> H -0.266983 -2.695252 0.801180<br/> H -0.471453 -1.871677 2.169188<br/> H 1.064640 -2.151507 1.606721<br/> N -1.586397 1.892312 0.334871<br/> H -2.203527 1.862205 -0.475103<br/> H -1.163109 2.817242 0.374088<br/> H -2.198376 1.763222 1.137332<br/> N 0.201117 -1.700342 -1.615253<br/> H 0.481145 -1.262669 -2.491785<br/> H -0.670415 -2.200068 -1.781992<br/> H 0.933499 -2.363685 -1.372240<br/> (54.9, 88.4, 93.0, 114.2, 148.0, 153.8, 157.4, 177.9, 184.0, 189.7, 195.4, 201.6, 211.9, 225.7, 232.9, 242.8, 283.9, 284.6, 298.5, 309.5, 333.2, 344.1, 358.5, 365.2, 374.9, 497.7, 505.5, 521.7, 543.4, 591.5, 599.7, 612.8, 618.0, 629.0, 658.6, 671.1, 750.7, 1217.8, 1224.6, 1230.4, 1244.6, 1596.9, 1603.4, 1605.9, 1614.5, 1626.0, 1628.5, 1637.4, 1643.8, 3463.1, 3465.3, 3467.0, 3470.1, 3573.1, 3582.4, 3583.2, 3586.5, 3588.6, 3591.1, 3596.1, 3600.0, 3736.4, 3877.0)<br/> -1344.78958805, 0.184253, 0.139787</p> |

| <b>(NH<sub>3</sub>)<sub>5</sub>(Cl)<sub>2</sub>ZrO<sup>+</sup>+H<sub>2</sub>O<br/>(doublet)</b> |                                                                                                                                                                                                                                                                                                                                                                                                                                                                                                                                                                             |                                                                                                                                                                                                                                                                                                                                                                                                                                                                                                                                                                                 |                                                                                                                                                                                                                                                                                                                                                                                                                                                                                                                                                                            |
|-------------------------------------------------------------------------------------------------|-----------------------------------------------------------------------------------------------------------------------------------------------------------------------------------------------------------------------------------------------------------------------------------------------------------------------------------------------------------------------------------------------------------------------------------------------------------------------------------------------------------------------------------------------------------------------------|---------------------------------------------------------------------------------------------------------------------------------------------------------------------------------------------------------------------------------------------------------------------------------------------------------------------------------------------------------------------------------------------------------------------------------------------------------------------------------------------------------------------------------------------------------------------------------|----------------------------------------------------------------------------------------------------------------------------------------------------------------------------------------------------------------------------------------------------------------------------------------------------------------------------------------------------------------------------------------------------------------------------------------------------------------------------------------------------------------------------------------------------------------------------|
|                                                                                                 | Cl -1.877489 -1.693618 -0.601108                                                                                                                                                                                                                                                                                                                                                                                                                                                                                                                                            | Cl 1.373052 2.008237 -0.663710                                                                                                                                                                                                                                                                                                                                                                                                                                                                                                                                                  | Cl -1.768942 -0.852938 -1.198534                                                                                                                                                                                                                                                                                                                                                                                                                                                                                                                                           |
|                                                                                                 | Cl -1.191390 2.110212 0.690970                                                                                                                                                                                                                                                                                                                                                                                                                                                                                                                                              | Cl 1.642487 -1.871097 0.439060                                                                                                                                                                                                                                                                                                                                                                                                                                                                                                                                                  | Cl 2.412651 -0.484149 -0.952055                                                                                                                                                                                                                                                                                                                                                                                                                                                                                                                                            |
|                                                                                                 | Zr -0.151395 -0.032302 -0.050725                                                                                                                                                                                                                                                                                                                                                                                                                                                                                                                                            | Zr 0.100694 0.015623 -0.021843                                                                                                                                                                                                                                                                                                                                                                                                                                                                                                                                                  | Zr 0.168555 0.055246 0.136245                                                                                                                                                                                                                                                                                                                                                                                                                                                                                                                                              |
|                                                                                                 | O 1.236150 -0.721480 -1.382377                                                                                                                                                                                                                                                                                                                                                                                                                                                                                                                                              | O -1.445838 0.640097 -1.319093                                                                                                                                                                                                                                                                                                                                                                                                                                                                                                                                                  | O -0.861922 -0.177353 1.796093                                                                                                                                                                                                                                                                                                                                                                                                                                                                                                                                             |
|                                                                                                 | O 3.627991 -0.360031 -0.094919                                                                                                                                                                                                                                                                                                                                                                                                                                                                                                                                              | O -3.260702 0.105409 -0.103381                                                                                                                                                                                                                                                                                                                                                                                                                                                                                                                                                  | O -3.545860 -0.044828 0.665345                                                                                                                                                                                                                                                                                                                                                                                                                                                                                                                                             |
|                                                                                                 | H 4.545730 -0.542241 -0.322123                                                                                                                                                                                                                                                                                                                                                                                                                                                                                                                                              | H -3.978366 -0.116703 -0.715690                                                                                                                                                                                                                                                                                                                                                                                                                                                                                                                                                 | H -4.109847 -0.688777 0.199046                                                                                                                                                                                                                                                                                                                                                                                                                                                                                                                                             |
|                                                                                                 | H 3.053768 -0.662541 -0.822667                                                                                                                                                                                                                                                                                                                                                                                                                                                                                                                                              | H -2.402286 0.771316 -0.855386                                                                                                                                                                                                                                                                                                                                                                                                                                                                                                                                                  | H -1.830177 -0.185952 1.829596                                                                                                                                                                                                                                                                                                                                                                                                                                                                                                                                             |
|                                                                                                 | N 0.848130 -2.132171 0.681852                                                                                                                                                                                                                                                                                                                                                                                                                                                                                                                                               | N -1.156441 1.800328 1.078625                                                                                                                                                                                                                                                                                                                                                                                                                                                                                                                                                   | N -1.407269 1.924220 0.178974                                                                                                                                                                                                                                                                                                                                                                                                                                                                                                                                              |
|                                                                                                 | H 0.483073 -2.595574 1.509955                                                                                                                                                                                                                                                                                                                                                                                                                                                                                                                                               | H -0.924029 2.120013 2.015255                                                                                                                                                                                                                                                                                                                                                                                                                                                                                                                                                   | H -1.347801 2.715586 -0.456471                                                                                                                                                                                                                                                                                                                                                                                                                                                                                                                                             |
|                                                                                                 | H 1.862187 -2.068154 0.767852                                                                                                                                                                                                                                                                                                                                                                                                                                                                                                                                               | H -2.158855 1.605960 1.055000                                                                                                                                                                                                                                                                                                                                                                                                                                                                                                                                                   | H -1.453178 2.292070 1.126921                                                                                                                                                                                                                                                                                                                                                                                                                                                                                                                                              |
|                                                                                                 | H 0.647839 -2.753908 -0.101061                                                                                                                                                                                                                                                                                                                                                                                                                                                                                                                                              | H -0.987344 2.584802 0.449665                                                                                                                                                                                                                                                                                                                                                                                                                                                                                                                                                   | H -2.309026 1.466581 0.015729                                                                                                                                                                                                                                                                                                                                                                                                                                                                                                                                              |
|                                                                                                 | N -1.213298 0.755910 -2.035149                                                                                                                                                                                                                                                                                                                                                                                                                                                                                                                                              | N 1.004326 -0.463791 -2.173545                                                                                                                                                                                                                                                                                                                                                                                                                                                                                                                                                  | N 0.340348 -2.326314 0.203924                                                                                                                                                                                                                                                                                                                                                                                                                                                                                                                                              |
|                                                                                                 | H -1.061703 1.729808 -2.285780                                                                                                                                                                                                                                                                                                                                                                                                                                                                                                                                              | H 1.098282 -1.449379 -2.406787                                                                                                                                                                                                                                                                                                                                                                                                                                                                                                                                                  | H 1.221112 -2.700389 0.548707                                                                                                                                                                                                                                                                                                                                                                                                                                                                                                                                              |
|                                                                                                 | H -2.214538 0.638976 -1.888778                                                                                                                                                                                                                                                                                                                                                                                                                                                                                                                                              | H 1.938621 -0.059640 -2.204171                                                                                                                                                                                                                                                                                                                                                                                                                                                                                                                                                  | H 0.230112 -2.669598 -0.748301                                                                                                                                                                                                                                                                                                                                                                                                                                                                                                                                             |
|                                                                                                 | H -0.957041 0.158776 -2.819737                                                                                                                                                                                                                                                                                                                                                                                                                                                                                                                                              | H 0.451428 0.007174 -2.888389                                                                                                                                                                                                                                                                                                                                                                                                                                                                                                                                                   | H -0.429358 -2.705518 0.751939                                                                                                                                                                                                                                                                                                                                                                                                                                                                                                                                             |
|                                                                                                 | N -1.305648 -0.493811 2.052755                                                                                                                                                                                                                                                                                                                                                                                                                                                                                                                                              | N 1.397843 0.601238 1.949326                                                                                                                                                                                                                                                                                                                                                                                                                                                                                                                                                    | N 0.255609 1.119068 -2.074966                                                                                                                                                                                                                                                                                                                                                                                                                                                                                                                                              |
|                                                                                                 | H -2.250766 -0.221943 1.781942                                                                                                                                                                                                                                                                                                                                                                                                                                                                                                                                              | H 2.342603 0.500817 1.578439                                                                                                                                                                                                                                                                                                                                                                                                                                                                                                                                                    | H 0.443365 0.304392 -2.658847                                                                                                                                                                                                                                                                                                                                                                                                                                                                                                                                              |
|                                                                                                 | H -1.068968 0.094181 2.849174                                                                                                                                                                                                                                                                                                                                                                                                                                                                                                                                               | H 1.348524 -0.033601 2.743411                                                                                                                                                                                                                                                                                                                                                                                                                                                                                                                                                   | H 1.022155 1.761831 -2.263203                                                                                                                                                                                                                                                                                                                                                                                                                                                                                                                                              |
|                                                                                                 | H -1.373363 -1.461138 2.360162                                                                                                                                                                                                                                                                                                                                                                                                                                                                                                                                              | H 1.326879 1.560531 2.280628                                                                                                                                                                                                                                                                                                                                                                                                                                                                                                                                                    | H -0.614965 1.519566 -2.416837                                                                                                                                                                                                                                                                                                                                                                                                                                                                                                                                             |
|                                                                                                 | N 1.323683 1.705870 -0.996712                                                                                                                                                                                                                                                                                                                                                                                                                                                                                                                                               | N -1.107059 -1.928100 -0.858992                                                                                                                                                                                                                                                                                                                                                                                                                                                                                                                                                 | N 1.683773 -0.477044 1.987078                                                                                                                                                                                                                                                                                                                                                                                                                                                                                                                                              |
|                                                                                                 | H 1.355857 1.669570 -2.012782                                                                                                                                                                                                                                                                                                                                                                                                                                                                                                                                               | H -1.132093 -1.884089 -1.874304                                                                                                                                                                                                                                                                                                                                                                                                                                                                                                                                                 | H 1.866173 0.269524 2.653017                                                                                                                                                                                                                                                                                                                                                                                                                                                                                                                                               |
|                                                                                                 | H 2.287961 1.599523 -0.682681                                                                                                                                                                                                                                                                                                                                                                                                                                                                                                                                               | H -2.080656 -1.862829 -0.564150                                                                                                                                                                                                                                                                                                                                                                                                                                                                                                                                                 | H 2.578384 -0.858294 1.686325                                                                                                                                                                                                                                                                                                                                                                                                                                                                                                                                              |
|                                                                                                 | H 0.974886 2.621381 -0.716130                                                                                                                                                                                                                                                                                                                                                                                                                                                                                                                                               | H -0.714184 -2.826655 -0.586041                                                                                                                                                                                                                                                                                                                                                                                                                                                                                                                                                 | H 1.162912 -1.177221 2.510471                                                                                                                                                                                                                                                                                                                                                                                                                                                                                                                                              |
|                                                                                                 | N 1.469753 0.549033 1.604765                                                                                                                                                                                                                                                                                                                                                                                                                                                                                                                                                | N -1.207638 -0.944431 1.733875                                                                                                                                                                                                                                                                                                                                                                                                                                                                                                                                                  | N 1.434883 2.041801 0.639023                                                                                                                                                                                                                                                                                                                                                                                                                                                                                                                                               |
|                                                                                                 | H 1.374171 1.541302 1.815504                                                                                                                                                                                                                                                                                                                                                                                                                                                                                                                                                | H -0.978044 -1.929580 1.850654                                                                                                                                                                                                                                                                                                                                                                                                                                                                                                                                                  | H 2.407532 1.760264 0.513769                                                                                                                                                                                                                                                                                                                                                                                                                                                                                                                                               |
|                                                                                                 | H 2.414883 0.368522 1.247279                                                                                                                                                                                                                                                                                                                                                                                                                                                                                                                                                | H -2.185863 -0.857132 1.441631                                                                                                                                                                                                                                                                                                                                                                                                                                                                                                                                                  | H 1.320731 2.403035 1.583668                                                                                                                                                                                                                                                                                                                                                                                                                                                                                                                                               |
|                                                                                                 | H 1.381300 0.051730 2.487000                                                                                                                                                                                                                                                                                                                                                                                                                                                                                                                                                | H -1.121435 -0.508056 2.647789                                                                                                                                                                                                                                                                                                                                                                                                                                                                                                                                                  | H 1.267450 2.818882 0.004950                                                                                                                                                                                                                                                                                                                                                                                                                                                                                                                                               |
|                                                                                                 | (36.7, 59.1, 93.3, 104.9, 120.8, 132.1, 133.6, 147.9, 152.4, 170.8, 184.1, 189.9, 202.3, 203.8, 211.6, 226.7, 230.2, 242.8, 248.1, 258.6, 274.9, 283.4, 286.9, 300.1, 311.9, 335.6, 341.6, 347.0, 355.9, 394.2, 498.7, 506.4, 540.0, 565.0, 577.4, 591.3, 626.1, 636.8, 653.2, 655.1, 676.2, 702.6, 1195.4, 1228.9, 1232.8, 1241.6, 1264.0, 1549.1, 1594.0, 1600.6, 1604.2, 1610.4, 1614.5, 1618.3, 1627.3, 1634.6, 1641.2, 1659.6, 3375.7, 3451.3, 3458.2, 3467.5, 3468.4, 3532.6, 3567.5, 3568.6, 3570.6, 3583.3, 3590.4, 3593.1, 3593.9, 3599.7, 3600.0, 3655.5, 3917.9) | (1481.7i, 65.7, 101.9, 110.2, 113.3, 116.6, 129.5, 134.1, 157.3, 161.2, 174.9, 182.9, 196.3, 200.8, 209.1, 220.8, 230.4, 234.5, 253.5, 271.3, 285.1, 289.9, 305.3, 313.6, 323.3, 344.1, 347.5, 354.4, 393.1, 437.2, 485.6, 521.2, 553.8, 558.4, 593.6, 603.8, 614.8, 626.6, 635.4, 661.2, 674.7, 702.0, 1108.4, 1195.6, 1219.0, 1231.7, 1243.2, 1264.4, 1594.9, 1596.2, 1603.8, 1610.8, 1616.4, 1622.5, 1630.4, 1636.9, 1643.3, 1663.6, 1886.4, 3407.2, 3444.6, 3459.4, 3465.4, 3467.8, 3547.8, 3552.4, 3571.1, 3577.7, 3582.6, 3591.2, 3597.5, 3598.5, 3599.4, 3603.0, 3822.6) | (52.5, 78.3, 86.3, 107.7, 120.2, 131.6, 136.7, 142.7, 151.1, 159.1, 168.7, 182.6, 185.5, 198.8, 203.1, 205.2, 219.9, 226.7, 236.9, 243.5, 252.4, 274.9, 275.5, 280.0, 290.1, 309.8, 322.3, 335.6, 347.0, 423.8, 484.8, 519.9, 538.2, 571.5, 579.3, 598.2, 607.6, 611.2, 628.0, 645.5, 657.3, 674.2, 700.9, 1195.0, 1212.8, 1231.3, 1243.4, 1258.6, 1593.0, 1598.0, 1602.7, 1607.1, 1613.2, 1623.5, 1625.7, 1638.1, 1640.6, 1646.0, 3419.5, 3461.4, 3466.8, 3470.1, 3471.7, 3540.6, 3571.4, 3577.0, 3589.3, 3595.3, 3597.3, 3598.3, 3598.8, 3601.2, 3601.7, 3776.0, 3787.3) |
|                                                                                                 | -1401.33083936, 0.223991, 0.175842                                                                                                                                                                                                                                                                                                                                                                                                                                                                                                                                          | -1401.29643637, 0.219032, 0.172700                                                                                                                                                                                                                                                                                                                                                                                                                                                                                                                                              | -1401.31499165, 0.221479, 0.173215                                                                                                                                                                                                                                                                                                                                                                                                                                                                                                                                         |

**Table S9.** MRCI/ cc-pVDZ-PP(Nb) cc-pVDZ(H) aug-cc-pVDZ(O,S) optimal geometries (Cartesian coordinates in Å) of the reactants, transition states, and products of the  $\text{NbO}^+ + \text{H}_2\text{S} \rightarrow [\text{HS-Nb-OH}]^+$  reaction for the first three singlets ( $1^1\text{A}$ ,  $2^1\text{A}$ ,  $3^1\text{A}$ ) and the first three triplets ( $1^3\text{A}$ ,  $2^3\text{A}$ ,  $3^3\text{A}$ ).

|               | Reactants |               |               |               | Transition States |               |               |               | Products         |               |               |               |
|---------------|-----------|---------------|---------------|---------------|-------------------|---------------|---------------|---------------|------------------|---------------|---------------|---------------|
| $1^1\text{A}$ | Nb        | 0.5325567661  | -0.3722759601 | 0.0003096869  | Nb                | 0.6285221488  | -0.1577295848 | 0.0043121959  | Nb               | 0.3115461371  | -0.1195300419 | 0.0000015261  |
|               | O         | 1.0602421696  | 1.2238390015  | -0.0004031711 | O                 | 0.3419655320  | 1.5879114605  | 0.0444892713  | O                | 1.5330512467  | 1.2683880773  | 0.0000014722  |
|               | S         | -2.1020341103 | -0.1105298716 | 0.0002055257  | S                 | -1.8318532581 | -0.2626476140 | -0.1716820422 | S                | -2.0350591231 | -0.0156908655 | -0.0000024850 |
|               | H         | -2.2973743632 | 0.7790585196  | -0.9959372972 | H                 | -0.8329081223 | 1.1964838610  | -0.0406295144 | H                | 1.7003226587  | 2.2141498819  | 0.0000016521  |
|               | H         | -2.2975674624 | 0.7793033105  | 0.9960922557  | H                 | -2.1882244952 | -0.3120412198 | 1.1322840216  | H                | -2.1892139194 | 1.3288279482  | -0.0000101655 |
| $2^1\text{A}$ | Nb        | 0.5194096900  | -0.3197467094 | 0.0003114674  | Nb                | 0.6177309638  | -0.1610191390 | -0.0024682116 | Nb               | 0.2291144126  | 0.1231948378  | 0.0000006217  |
|               | O         | 1.1756375098  | 1.2243329908  | -0.0004143877 | O                 | 0.3521749155  | 1.5832690793  | 0.0804991355  | O                | 1.6419112218  | 1.3205861919  | 0.0000031121  |
|               | S         | -2.1855039216 | -0.1405274926 | 0.0002013215  | S                 | -1.8262989502 | -0.2635226742 | -0.1590384340 | S                | -2.1373208505 | -0.1193355109 | -0.0000029576 |
|               | H         | -2.3067838120 | 0.7675518473  | -0.9939186037 | H                 | -0.8578251254 | 1.1977987565  | -0.0802390339 | H                | 2.0903282695  | 2.1686015512  | 0.0000017763  |
|               | H         | -2.3069364663 | 0.7677843638  | 0.9940872025  | H                 | -2.1682799985 | -0.3045491197 | 1.1300204762  | H                | -2.5033860534 | 1.1830979299  | -0.0000105526 |
| $3^1\text{A}$ | Nb        | 0.5202277605  | -0.1636799244 | 0.0002282747  | Nb                | 0.6010830748  | -0.1767754081 | 0.0895927942  | Nb               | 0.1831418936  | 0.3031234570  | -0.0000055778 |
|               | O         | 1.5477460193  | 1.1739517231  | -0.0003727080 | O                 | 0.3603985869  | 1.5760093742  | -0.0014269281 | O                | 1.7141457075  | 1.3523606395  | 0.0000002320  |
|               | S         | -2.2794914078 | -0.1731159605 | 0.0002201086  | S                 | -1.8723415610 | -0.2008955407 | -0.1937883395 | S                | -2.1494919196 | -0.1633218729 | -0.0000037365 |
|               | H         | -2.4463115872 | 0.7309862762  | -0.9917176369 | H                 | -0.8608045233 | 1.2367071281  | -0.0537985737 | H                | 2.2894179722  | 2.1197276120  | 0.0000032672  |
|               | H         | -2.4463477850 | 0.7312528856  | 0.9919089617  | H                 | -2.1108337722 | -0.3830686505 | 1.1281949792  | H                | -2.7165666537 | 1.0642551644  | -0.0000021850 |
| $1^3\text{A}$ | Nb        | 0.5404235643  | -0.2848369802 | -0.1983257521 | Nb                | 0.4946140875  | 0.0621794388  | 0.0213054509  | Nb               | -0.3221176963 | -0.1232932549 | 0.4378361100  |
|               | O         | 1.0497177506  | 1.1864968037  | 0.4381243528  | O                 | -0.0051252299 | 1.7447427239  | -0.0324726453 | O                | -1.7801255366 | 0.9233980240  | 0.0559115254  |
|               | S         | -2.1518239240 | -0.1690067785 | -0.3361893108 | S                 | -1.9322757362 | -0.2764449208 | -0.2093017159 | S                | 1.6592917725  | 0.5741423064  | -0.5971681614 |
|               | H         | -2.2454744921 | 1.0617163620  | -0.8869293006 | H                 | -1.1516678369 | 1.2939007535  | -0.0235780542 | H                | -2.2501598199 | 1.6448603613  | -0.3684466952 |
|               | H         | -2.3810749752 | 0.2591927522  | 0.9253458635  | H                 | -2.2745480101 | -0.3634512104 | 1.1129881658  | H                | 2.2111842804  | 1.2024185631  | 0.4718532212  |
| $2^3\text{A}$ | Nb        | 0.4689361201  | 0.4222005032  | -0.5058857901 | Nb                | 0.7377692956  | -0.2665033405 | 0.0667854747  | N/A <sup>a</sup> |               |               |               |
|               | O         | 1.8901301186  | 0.8236891560  | 0.3415140332  | O                 | 0.3171355409  | 1.5719213236  | 0.0133139778  |                  |               |               |               |
|               | S         | -2.1777440507 | -0.1682718727 | 0.1382010978  | S                 | -1.8225839452 | -0.1349080243 | -0.1705615464 |                  |               |               |               |
|               | H         | -2.8439579906 | 0.3407906815  | -0.9243075921 | H                 | -0.9901642420 | 1.2295572591  | -0.0523032138 |                  |               |               |               |
|               | H         | -2.4415411973 | 0.8809865318  | 0.9507452511  | H                 | -2.1246548440 | -0.3480903150 | 1.1115392399  |                  |               |               |               |
| $3^3\text{A}$ | Nb        | 0.5030264260  | -0.0989354931 | 0.1943197422  | Nb                | 0.7120100438  | -0.2091041229 | 0.0362100393  | Nb               | -0.3616741068 | -0.1586104278 | -0.0000045176 |
|               | O         | 1.6339410944  | 1.1568803120  | -0.0030132838 | O                 | 0.3129873636  | 1.5561669307  | 0.0293837920  | O                | -1.9045439846 | 0.8826582636  | -0.0000405236 |
|               | S         | -2.1937170571 | -0.1135051503 | -0.4196342526 | S                 | -1.8197742512 | -0.1767112824 | -0.1823502322 | S                | 1.9484554465  | 0.2003074424  | 0.0000304977  |
|               | H         | -2.3485589375 | 1.2141327792  | -0.6277237919 | H                 | -0.9377453336 | 1.1950867357  | -0.0358795772 | H                | -2.2985054673 | 1.7584494230  | -0.0000847156 |
|               | H         | -2.7829236023 | -0.1050102886 | 0.7980774388  | H                 | -2.1499760172 | -0.3134613581 | 1.1214099104  | H                | 2.1343411122  | 1.5387212989  | 0.0000852590  |

<sup>a</sup> Geometry optimization calculations failed for this structure.



**Table S10.** Harmonic vibrational frequencies (cm<sup>-1</sup>) of the optimal geometries given in Table S9.

|                       | Reactants                                                        | Transition States                                                  | Products                                                        |
|-----------------------|------------------------------------------------------------------|--------------------------------------------------------------------|-----------------------------------------------------------------|
| <b>1<sup>1</sup>A</b> | 85.1, 120.0, 230.7, 465.8, 568.3, 1033.6, 1236.8, 2764.3, 2776.2 | 1726.1i, 280.5, 409.2, 457.0, 647.3, 932.4, 1023.7, 1613.5, 2736.5 | 109.4, 247.5, 410.2, 453.2, 486.9, 523.7, 808.8, 2739.6, 3951.7 |
| <b>2<sup>1</sup>A</b> | 45.8, 93.5, 228.5, 478.5, 535.8, 1041.8, 1219.8, 2751.0, 2764.9  | 1789.4i, 205.4, 283.4, 413.1, 498.2, 932.3, 1029.9, 1575.3, 2874.6 | 98.2, 131.6, 402.7, 403.2, 447.3, 474.2, 800.3, 2743.3, 3970.1  |
| <b>3<sup>1</sup>A</b> | 37.3, 87.5, 212.3, 491.2, 519.5, 1009.5, 1214.8, 2747.9, 2762.0  | 1843.0i, 281.7, 282.9, 394.5, 520.8, 908.7, 1079.0, 1514.0, 2728.7 | 185.6, 205.9, 408.6, 436.4, 461.7, 522.3, 810.7, 2748.7, 3971.7 |
| <b>1<sup>3</sup>A</b> | 60.4, 100.8, 232.3, 483.4, 537.0, 1031.2, 1221.5, 2753.2, 2766.9 | 1800.7i, 273.6, 403.0, 433.4, 630.6, 977.1, 1070.4, 1570.3, 2603.0 | 125.1, 176.2, 410.4, 464.0, 490.3, 526.0, 808.7, 2708.8, 3957.3 |
| <b>2<sup>3</sup>A</b> | 82.3, 100.3, 211.6, 458.3, 521.4, 956.8, 1216.8, 2740.3, 2756.3  | 1592.2i, 131.9, 292.2, 406.2, 454.1, 675.1, 1170.9, 1433.4, 2880.2 | -                                                               |
| <b>3<sup>3</sup>A</b> | 65.1, 87.6, 219.9, 473.1, 532.7, 955.4, 1216.6, 2743.9, 2758.8   | 1615.4i, 301.0, 361.7, 437.2, 576.8, 841.2, 1154.3, 1461.7, 2748.1 | 166.3, 302.1, 396.6, 502.1, 508.0, 639.1, 803.7, 2755.5, 3949.1 |

**Table S11.** MRCI(+Q)/cc-pVTZ-PP(Nb) cc-pVTZ(H) aug-cc-pVTZ(O,S) electronic energies (a.u.) of optimal geometries of the fragments, reactants, transition states, and products of the NbO<sup>+</sup> + H<sub>2</sub>S → [HS-Nb-OH]<sup>+</sup> reaction for the first three singlets (1<sup>1</sup>A, 2<sup>1</sup>A, 3<sup>1</sup>A) and the first three triplets (1<sup>3</sup>A, 2<sup>3</sup>A, 3<sup>3</sup>A).

| State            | Fragments <sup>a</sup> |             | Intermediate |             | TS          |             | Products                 |                          |
|------------------|------------------------|-------------|--------------|-------------|-------------|-------------|--------------------------|--------------------------|
|                  | MRCI                   | MRCI+Q      | MRCI         | MRCI+Q      | MRCI        | MRCI+Q      | MRCI                     | MRCI+Q                   |
| 1 <sup>1</sup> A | -530.033896            | -530.099287 | -530.091588  | -530.159713 | -530.019832 | -530.096743 | -530.088213              | -530.155605              |
| 2 <sup>1</sup> A | -530.033789            | -530.099095 | -530.087944  | -530.155477 | -530.013375 | -530.091162 | -530.079884              | -530.145326              |
| 3 <sup>1</sup> A | -530.030398            | -530.097020 | -530.078792  | -530.146933 | -530.000270 | -530.078134 | -530.081048              | -530.145325              |
| 1 <sup>3</sup> A | -530.060853            | -530.126131 | -530.115254  | -530.182418 | -530.043880 | -530.119788 | -530.113260              | -530.180685              |
| 2 <sup>3</sup> A | -530.032536            | -530.097661 | -530.080341  | -530.145713 | -530.023874 | -530.090518 | -530.102880 <sup>b</sup> | -530.169828 <sup>b</sup> |
| 3 <sup>3</sup> A | -530.031965            | -530.097154 | -530.064042  | -530.137288 | -529.984466 | -530.056883 | -530.098702              | -530.165182              |

<sup>a</sup> Single point energy calculations of NbO<sup>+</sup> and H<sub>2</sub>S separated by a distance of 1,000 Å.

<sup>b</sup> Single point energy using the 3<sup>3</sup>A product structure.

**Table S12.** DFT/MN15/cc-pVTZ-PP(Nb) cc-pVTZ(H) aug-cc-pVTZ(O, S, Cl, N) optimal geometries (Cartesian coordinates in Å), harmonic vibrational frequencies (cm<sup>-1</sup>, in brackets), and energies (total electronic energy, zero-point energy, free energy correction in a.u.) of the reactants, transition states, and products of the NbO<sup>+</sup> + H<sub>2</sub>S → [HS-Nb-OH]<sup>+</sup> and [XNbO]<sup>+</sup> + H<sub>2</sub>S → [XNb-OH...SH]<sup>+</sup> reactions [X = Cl<sub>3</sub>, (NH<sub>3</sub>)Cl<sub>3</sub>, (NH<sub>3</sub>)<sub>2</sub>Cl<sub>3</sub>].

|                                                                           | Reactants                                                                                                                                                                                                                                                                                                                                                                                                                                                     | Transition State                                                                                                                                                                                                                                                                                                                                                                                                                                                 | Products                                                                                                                                                                                                                                                                                                                                                                                                                                                  |
|---------------------------------------------------------------------------|---------------------------------------------------------------------------------------------------------------------------------------------------------------------------------------------------------------------------------------------------------------------------------------------------------------------------------------------------------------------------------------------------------------------------------------------------------------|------------------------------------------------------------------------------------------------------------------------------------------------------------------------------------------------------------------------------------------------------------------------------------------------------------------------------------------------------------------------------------------------------------------------------------------------------------------|-----------------------------------------------------------------------------------------------------------------------------------------------------------------------------------------------------------------------------------------------------------------------------------------------------------------------------------------------------------------------------------------------------------------------------------------------------------|
| <b>NbO<sup>+</sup>+H<sub>2</sub>S</b><br><b>(Singlet)</b>                 | Nb 0.612615 -0.293785 -0.000006<br>O 1.130429 1.271947 -0.000284<br>S -1.852699 0.015281 0.000143<br>H -2.259096 0.812332 -0.993676<br>H -2.258379 0.812792 0.993894<br>(167.7, 218.9, 232.2, 442.0, 570.0, 1096.9, 1218.8, 2712.2, 2714.4)<br><i>-530.900066837, 0.021354, -0.007948</i>                                                                                                                                                                     | Nb 0.616198 -0.304276 0.004625<br>O 0.717816 1.419921 0.000309<br>S -1.771735 -0.011671 -0.085616<br>H -0.536993 1.240820 -0.029368<br>H -2.121910 0.061836 1.207126<br>(1665.5i, 288.8, 409.6, 483.6, 620.1, 909.7, 1011.7, 1640.2, 2675.5)<br><i>-530.849358978, 0.018315, -0.009998</i>                                                                                                                                                                       | Nb -0.369987 -0.348132 -0.000104<br>O -1.729641 0.855700 -0.000176<br>S 1.832234 0.253704 0.000351<br>H -2.021151 1.780011 0.000282<br>H 1.711995 1.588552 -0.000232<br>(109.8, 112.8, 431.7, 487.7, 497.4, 521.0, 819.6, 2701.5, 3816.6)<br><i>-530.917120968, 0.021638, -0.008101</i>                                                                                                                                                                   |
| <b>NbO<sup>+</sup>+H<sub>2</sub>S</b><br><b>(Triplet)</b>                 | Nb 0.632664 -0.295848 -0.000031<br>O 1.117651 1.282195 0.000444<br>S -1.926505 0.004164 -0.000892<br>H -2.024938 0.910729 -0.981323<br>H -2.031399 0.894846 0.993296<br>(39.8, 142.0, 262.5, 427.7, 498.7, 1095.3, 1171.3, 2713.9, 2721.0)<br><i>-530.924868149, 0.020668, -0.011052</i>                                                                                                                                                                      | Nb 0.622973 -0.300591 0.002406<br>O 0.685973 1.425495 0.004205<br>S -1.777500 -0.019008 -0.084125<br>H -0.575380 1.237458 -0.022431<br>H -2.014278 -0.013044 1.236148<br>(1686.5i, 285.3, 355.2, 413.5, 552.9, 951.0, 1010.0, 1599.6, 2690.9)<br><i>-530.877137812, 0.017903, -0.011562</i>                                                                                                                                                                      | Nb 0.391567 -0.373737 0.000845<br>O 1.566223 0.984606 -0.014486<br>S -1.779018 0.331535 0.082339<br>H 1.909909 1.890364 0.000677<br>H -2.029645 0.251449 -1.236852<br>(144.7, 229.7, 424.4, 454.7, 465.8, 527.5, 851.0, 2660.3, 3827.9)<br><i>-530.936477130, 0.021838, -0.008386</i>                                                                                                                                                                     |
| <b>NbO<sup>+</sup>+H<sub>2</sub>S</b><br><b>(Quintet)</b>                 | Nb 0.520539 -0.295828 0.003836<br>O 1.935213 0.975058 -0.025918<br>S -2.029937 0.164484 0.066541<br>H -2.363285 0.203159 -1.231364<br>H -1.981524 1.493585 0.216757<br>(83.6, 105.1, 256.1, 431.0, 513.2, 712.0, 1168.2, 2703.1, 2724.8)<br><i>-530.786028402, 0.019813, -0.012041</i>                                                                                                                                                                        | Nb 0.774454 -0.193910 0.001885<br>O -0.101711 1.508846 0.013284<br>S -1.715498 -0.308326 -0.079515<br>H -1.505563 1.116157 -0.146035<br>H -1.985403 -0.303407 1.234733<br>(1092.7i, 281.9, 348.0, 376.5, 523.4, 667.4, 1044.3, 1825.2, 2695.3)<br><i>-530.781009724, 0.017683, -0.012407</i>                                                                                                                                                                     | Nb 0.449254 -0.184269 0.000030<br>O 2.137396 0.440486 0.000045<br>S -2.265285 0.102519 -0.000096<br>H 2.960996 0.947173 0.000036<br>H -2.235011 1.443684 -0.000104<br>(63.3, 93.3, 217.2, 449.0, 511.0, 514.1, 833.2, 2702.7, 3850.7)<br><i>-530.855978723, 0.021038, -0.010877</i>                                                                                                                                                                       |
| <b>(Cl)<sub>3</sub>NbO<sup>+</sup>+H<sub>2</sub>S</b><br><b>(Doublet)</b> | Nb -0.428155 -0.001082 0.007598<br>O 1.289132 -0.034955 0.253445<br>S 3.568154 -0.008423 0.030874<br>H 3.513989 -1.066799 0.847671<br>H 3.506200 0.879356 1.029946<br>Cl -1.020661 2.098733 -0.470201<br>Cl -1.411473 -0.698162 1.887866<br>Cl -0.913121 -1.362558 -1.694763<br>(26.5i, 36.0, 38.2, 112.8, 113.2, 118.7, 193.6, 223.6, 240.3, 435.0, 438.0, 482.1, 486.1, 487.2, 939.8, 1179.3, 2730.9, 2738.4)<br><i>-1911.45295757, 0.025044, -0.014374</i> | Nb -0.524306 0.000417 -0.061714<br>O 0.585485 0.004025 -1.373933<br>S 3.357355 0.082531 -0.510630<br>H 2.031370 0.030457 -1.089235<br>H 3.467213 -1.248000 -0.374944<br>Cl -1.752307 -1.861348 -0.156535<br>Cl -1.732103 1.875752 -0.125919<br>Cl 0.990081 -0.023361 1.644572<br>(185.8i, 36.4, 100.0, 106.0, 119.7, 145.2, 169.8, 212.3, 225.6, 384.6, 413.5, 465.7, 496.0, 696.0, 877.6, 1173.9, 1395.3, 2707.2)<br><i>-1911.44394803, 0.022155, -0.016378</i> | Nb 0.216130 0.031398 0.194281<br>O 0.067731 0.110048 1.987168<br>S -2.499773 0.132663 0.088241<br>H 0.133449 0.183747 2.949717<br>H -2.734489 -0.788154 1.032185<br>Cl 2.393343 -0.340639 -0.072184<br>Cl 0.039227 2.000640 -0.833470<br>Cl -0.479968 -1.876819 -0.815324<br>(47.5, 66.8, 125.2, 147.9, 158.5, 165.7, 191.0, 204.3, 242.1, 324.9, 348.8, 423.8, 460.9, 473.3, 533.4, 851.3, 2718.8, 3844.0)<br><i>-1911.46779436, 0.025807, -0.012985</i> |
| <b>(NH<sub>3</sub>)(Cl)<sub>3</sub>NbO<sup>+</sup>+H<sub>2</sub>S</b>     | Nb -0.336289 0.005537 0.030198                                                                                                                                                                                                                                                                                                                                                                                                                                | Nb -0.450186 0.006563 -0.153673                                                                                                                                                                                                                                                                                                                                                                                                                                  | Nb 0.463970 -0.004742 -0.000192                                                                                                                                                                                                                                                                                                                                                                                                                           |

|                                                                                                               |                                                                                                                                                                                                                                                                                                                                                                                                                                                                                                                                                                                                                                                                                                                                                                                                                                                                                                                                                                  |                                                                                                                                                                                                                                                                                                                                                                                                                                                                                                                                                                                                                                                                                                                                                                                                                                                                                                                                                                 |                                                                                                                                                                                                                                                                                                                                                                                                                                                                                                                                                                                                                                                                                                                                                                                                                                                                                                                                                             |
|---------------------------------------------------------------------------------------------------------------|------------------------------------------------------------------------------------------------------------------------------------------------------------------------------------------------------------------------------------------------------------------------------------------------------------------------------------------------------------------------------------------------------------------------------------------------------------------------------------------------------------------------------------------------------------------------------------------------------------------------------------------------------------------------------------------------------------------------------------------------------------------------------------------------------------------------------------------------------------------------------------------------------------------------------------------------------------------|-----------------------------------------------------------------------------------------------------------------------------------------------------------------------------------------------------------------------------------------------------------------------------------------------------------------------------------------------------------------------------------------------------------------------------------------------------------------------------------------------------------------------------------------------------------------------------------------------------------------------------------------------------------------------------------------------------------------------------------------------------------------------------------------------------------------------------------------------------------------------------------------------------------------------------------------------------------------|-------------------------------------------------------------------------------------------------------------------------------------------------------------------------------------------------------------------------------------------------------------------------------------------------------------------------------------------------------------------------------------------------------------------------------------------------------------------------------------------------------------------------------------------------------------------------------------------------------------------------------------------------------------------------------------------------------------------------------------------------------------------------------------------------------------------------------------------------------------------------------------------------------------------------------------------------------------|
| <p><b>(Doublet)</b></p>                                                                                       | <p>O 1.394040 0.054583 0.294445<br/> S 3.627002 -0.005045 -0.003778<br/> H 3.612837 -0.741568 1.111426<br/> H 3.601229 1.157140 0.655874<br/> Cl -0.831206 2.169640 0.480759<br/> Cl -0.899169 -1.540441 1.586216<br/> Cl -0.300395 -0.643289 -2.143186<br/> N -2.698185 -0.072296 -0.381036<br/> H -2.969249 0.570638 -1.123309<br/> H -3.232396 0.180254 0.448947<br/> H -2.998518 -1.003826 -0.663316</p> <p>(14.3, 23.8, 75.6, 81.2, 82.8, 150.1, 158.6, 161.7, 163.3, 212.4, 232.3, 266.2, 317.7, 405.1, 448.0, 450.4, 453.2, 505.1, 606.0, 607.2, 910.7, 1180.6, 1250.6, 1616.3, 1616.3, 2740.1, 2749.1, 3467.9, 3583.8, 3584.9)<br/> -1968.01380803, 0.064052, 0.019717</p>                                                                                                                                                                                                                                                                               | <p>O 0.792151 0.068113 -1.356649<br/> S 3.475690 0.108246 -0.384767<br/> H 2.205088 0.090271 -1.099814<br/> H 3.559742 -1.224685 -0.294688<br/> Cl -1.593021 -1.855836 -0.681807<br/> Cl -1.596291 1.907987 -0.510648<br/> Cl 1.294327 -0.089253 1.461275<br/> N -1.644050 -0.074574 1.916982<br/> H -2.648178 -0.060418 1.738614<br/> H -1.436989 0.718886 2.522034<br/> H -1.447174 -0.917250 2.455098</p> <p>(364.4i, 39.3, 52.2, 90.9, 133.6, 142.9, 148.6, 154.4, 181.1, 215.9, 236.3, 293.4, 304.2, 384.6, 407.8, 439.2, 465.9, 583.1, 597.3, 643.5, 911.6, 1185.9, 1262.5, 1312.5, 1615.6, 1616.8, 2729.1, 3463.2, 3572.6, 3579.4)<br/> -1968.01043448, 0.060972, 0.019822</p>                                                                                                                                                                                                                                                                           | <p>O -1.326713 -0.042299 -0.001575<br/> S -4.442617 0.070749 0.004104<br/> H -2.331741 -0.038769 -0.001567<br/> H -4.717824 -1.235035 -0.067200<br/> Cl 0.830950 -1.525049 -1.613293<br/> Cl 0.806467 -0.633079 2.129566<br/> Cl 0.742779 2.164118 -0.516346<br/> N 2.812442 0.054309 0.002346<br/> H 3.184669 0.335665 -0.904307<br/> H 3.214293 -0.856902 0.221305<br/> H 3.172987 0.713845 0.691393</p> <p>(24.1, 27.6, 85.0, 85.4, 91.7, 116.0, 174.6, 176.1, 182.2, 184.4, 216.0, 230.4, 309.5, 341.7, 419.0, 463.2, 463.7, 646.1, 647.5, 744.2, 843.8, 880.3, 1285.9, 1616.8, 1616.8, 2738.8, 3076.8, 3460.0, 3571.8, 3572.0)<br/> -1968.03163820, 0.064453, 0.020526</p>                                                                                                                                                                                                                                                                             |
| <p><b>(NH<sub>3</sub>)<sub>2</sub>(Cl)<sub>3</sub>NbO<sup>+</sup>+H<sub>2</sub>S</b><br/><b>(Doublet)</b></p> | <p>Nb -0.480791 0.002055 -0.175558<br/> O 0.561491 0.012990 -1.519493<br/> S 3.523070 0.086529 -0.547006<br/> H 2.443856 0.054029 -1.365266<br/> H 3.590029 -1.244578 -0.437135<br/> Cl -1.044786 -2.241843 0.020607<br/> Cl -1.048022 2.239430 0.054113<br/> Cl 1.556873 -0.016974 1.262453<br/> N -1.307777 -0.013905 2.123075<br/> H -2.325264 -0.003740 2.175185<br/> H -0.979775 0.802846 2.635259<br/> H -0.996167 -0.845489 2.621314<br/> N -2.371440 0.008721 -1.447497<br/> H -2.392464 0.840992 -2.035814<br/> H -3.231808 0.004565 -0.901469<br/> H -2.391601 -0.815408 -2.047132</p> <p>(25.1, 60.5, 71.1, 88.0, 96.8, 119.7, 131.5, 143.7, 169.4, 175.6, 185.8, 212.9, 230.2, 246.2, 258.8, 265.9, 311.8, 362.0, 402.2, 408.3, 413.1, 533.3, 553.9, 601.2, 648.0, 696.9, 998.8, 1188.3, 1235.4, 1278.4, 1609.6, 1610.9, 1617.2, 1617.3, 2500.9, 2740.1, 3463.5, 3468.8, 3578.3, 3578.8, 3581.1, 3591.4)<br/> -2024.57949609, 0.102678, 0.057336</p> | <p>Nb 0.429526 -0.001712 -0.131684<br/> O -0.763907 -0.016825 -1.399792<br/> S -3.445436 -0.088224 -0.555334<br/> H -2.087924 -0.042008 -1.214927<br/> H -3.520691 1.235714 -0.382909<br/> Cl 1.055049 2.222563 -0.033910<br/> Cl 1.069236 -2.217541 0.004017<br/> Cl -1.432447 0.013602 1.401056<br/> N 1.484624 0.018471 2.022389<br/> H 2.503150 0.014710 1.986859<br/> H 1.202727 -0.799159 2.560669<br/> H 1.207708 0.847499 2.545499<br/> N 2.136367 -0.008188 -1.671354<br/> H 2.075252 -0.840114 -2.257268<br/> H 3.065980 -0.004355 -1.253696<br/> H 2.073267 0.815501 -2.268505</p> <p>(792.3i, 34.9, 54.1, 76.0, 95.4, 116.7, 133.3, 145.9, 156.6, 190.9, 197.5, 209.6, 226.9, 231.5, 291.2, 332.4, 358.0, 384.9, 403.3, 413.8, 439.2, 493.5, 583.7, 629.1, 640.0, 694.8, 948.6, 1103.4, 1169.9, 1251.9, 1277.1, 1610.1, 1611.3, 1614.7, 1616.9, 2739.5, 3462.8, 3465.7, 3577.0, 3578.7, 3579.3, 3586.8)<br/> -2024.57595862, 0.099617, 0.055771</p> | <p>Nb 0.416056 0.000515 0.012830<br/> O -1.380044 0.037346 -0.046730<br/> S -4.528227 0.012009 -0.013655<br/> H -2.377878 0.029852 -0.040629<br/> H -4.683543 -0.001469 1.313395<br/> Cl 0.811856 2.258206 -0.303609<br/> Cl 0.705160 -2.240677 -0.480120<br/> Cl 0.822264 -0.084716 2.234120<br/> N 2.758444 -0.082660 -0.166896<br/> N 0.505400 0.137122 -2.309351<br/> H -0.314021 0.664710 -2.610042<br/> H 0.481717 -0.772179 -2.768306<br/> H 1.310569 0.656918 -2.653387<br/> H 3.087987 -0.835887 0.436501<br/> H 3.182770 0.784651 0.159790<br/> H 3.131394 -0.277708 -1.093958</p> <p>(22.3, 31.5, 60.8, 64.8, 78.1, 111.1, 112.6, 121.1, 136.3, 181.2, 191.3, 202.0, 214.9, 224.2, 234.8, 330.5, 341.4, 360.5, 401.9, 405.6, 432.2, 584.0, 646.2, 650.1, 671.1, 695.4, 825.9, 867.7, 1261.7, 1276.7, 1609.7, 1611.6, 1618.7, 1625.0, 2742.1, 3199.8, 3464.1, 3464.7, 3573.1, 3574.2, 3584.4, 3588.7)<br/> -2024.59359361, 0.103415, 0.056282</p> |

**Table S13.** MRCI/cc-pVDZ-PP(Nb) cc-pVDZ(H) aug-cc-pVDZ(O) optimal geometries (Cartesian coordinates in Å) of the reactants, transition states, and products of the  $\text{NbO}^+ + \text{H}_2\text{O} \rightarrow \text{Nb}(\text{OH})_2^+$  reaction for the first three singlets ( $1^1\text{A}$ ,  $2^1\text{A}$ ,  $3^1\text{A}$ ) and the first three triplets ( $1^3\text{A}$ ,  $2^3\text{A}$ ,  $3^3\text{A}$ ).

|               | Reactants |               |               |               | Transition State |               |               |               | Products |               |               |               |
|---------------|-----------|---------------|---------------|---------------|------------------|---------------|---------------|---------------|----------|---------------|---------------|---------------|
| $1^1\text{A}$ | Nb        | 0.2920006556  | -0.2459117977 | 0.0003536784  | Nb               | 0.4645755532  | -0.2712210726 | -0.0070691884 | Nb       | -0.0018713769 | -0.0005759759 | 0.0000014713  |
|               | O         | 1.2895619031  | 1.1069868810  | -0.0001418951 | O                | 0.0712980326  | 1.4644887038  | -0.0676388087 | O        | -1.8676734572 | 0.0013617150  | 0.0000005931  |
|               | O         | -1.8977780227 | 0.2830165241  | -0.0002931718 | O                | -1.5945457499 | -0.1778326251 | 0.0785488367  | O        | 1.8671363551  | 0.0013184963  | 0.0000032153  |
|               | H         | -2.3947374472 | 0.5776120177  | -0.7690265797 | H                | -1.0288932378 | 1.0592197588  | 0.0268354144  | H        | -2.8243600524 | 0.0027174145  | 0.0000012527  |
|               | H         | -2.3932240889 | 0.5776913750  | 0.7693749682  | H                | -2.1635471800 | -0.3328608263 | 0.8356681237  | H        | 2.8265695313  | 0.0030543500  | -0.0000255323 |
| $2^1\text{A}$ | Nb        | 0.2982686207  | -0.1543531902 | -0.0003498039 | Nb               | 0.4029850223  | -0.3390389640 | -0.0261100163 | Nb       | -0.0020804571 | -0.0004890197 | 0.0000014362  |
|               | O         | 1.4538266280  | 1.0624218184  | -0.0003982581 | O                | 0.0024170484  | 1.4474580740  | 0.0690978844  | O        | -1.8686962517 | 0.0013360929  | 0.0000008334  |
|               | O         | -1.9390874808 | 0.2959208065  | 0.0007176502  | O                | -1.6325113126 | -0.1553688092 | -0.1796038233 | O        | 1.8684113033  | 0.0013025563  | 0.0000027286  |
|               | H         | -2.4578048947 | 0.5475688460  | -0.7695992837 | H                | -1.0623499392 | 1.0822313115  | 0.0017218912  | H        | -2.8251748699 | 0.0026977821  | 0.0000011554  |
|               | H         | -2.4593798733 | 0.5478367192  | 0.7698966955  | H                | -2.4063098190 | -0.5369826123 | 0.1352610640  | H        | 2.8273412754  | 0.0030285883  | -0.0000251535 |
| $3^1\text{A}$ | Nb        | 0.3057417296  | 0.1333683534  | -0.2895118432 | Nb               | 0.4995518518  | -0.2890489403 | -0.0996993137 | Nb       | -0.0020576801 | -0.0005347191 | 0.0000011478  |
|               | O         | 1.7209665076  | 0.9019894519  | 0.2315480472  | O                | 0.0154942926  | 1.4430020756  | -0.0821336472 | O        | -1.8687143732 | 0.0013675983  | 0.0000006962  |
|               | O         | -1.9920065212 | 0.3758175976  | -0.0923150528 | O                | -1.5376938295 | -0.1261008102 | 0.1445535881  | O        | 1.8684139833  | 0.0013266464  | 0.0000033840  |
|               | H         | -2.7153956593 | -0.0838341924 | -0.5299107466 | H                | -1.0282893477 | 1.0323012595  | 0.1343267294  | H        | -2.8251949823 | 0.0026904053  | 0.0000013026  |
|               | H         | -2.4012097764 | 1.0427462786  | 0.4687904660  | H                | -2.1642268825 | -0.4404387777 | 0.8015274551  | H        | 2.8273540522  | 0.0030260691  | -0.0000255306 |
| $1^3\text{A}$ | Nb        | 0.2871223830  | -0.2324798900 | 0.0000737746  | Nb               | 0.4423789308  | -0.2537645816 | 0.0124801294  | Nb       | -0.0018758761 | -0.0005131268 | 0.0000011404  |
|               | O         | 1.3108779149  | 1.1013126231  | -0.0002626237 | O                | -0.0972534399 | 1.4475154516  | 0.0112421560  | O        | -1.8705615170 | 0.0013622416  | 0.0000006389  |
|               | O         | -1.9028393609 | 0.2837537956  | 0.0001228992  | O                | -1.6108231805 | -0.3187572360 | -0.1106566014 | O        | 1.8701120511  | 0.0013206219  | 0.0000033886  |
|               | H         | -2.3997785047 | 0.5733331812  | -0.7713979522 | H                | -1.1689156991 | 0.9466419603  | -0.0372724930 | H        | -2.8268762469 | 0.0026850765  | 0.0000013595  |
|               | H         | -2.3995594323 | 0.5734752900  | 0.7717309022  | H                | -2.2422516113 | -0.5948095943 | 0.5575718091  | H        | 2.8290025889  | 0.0030211868  | -0.0000255275 |
| $2^3\text{A}$ | Nb        | 0.2414557407  | 0.1086698301  | 0.2743139617  | Nb               | 0.5004600641  | -0.2664568680 | -0.0389554639 | Nb       | 0.0398480925  | -0.1961317627 | 0.3082897684  |
|               | O         | 1.6650215474  | 0.9199602981  | -0.1766692090 | O                | -0.0751361915 | 1.4599293483  | -0.1128780422 | O        | -1.7128088632 | 0.1121261135  | -0.1943252929 |
|               | O         | -1.9859591229 | 0.2986137005  | -0.0038349934 | O                | -1.5133881281 | -0.2442053741 | 0.1940072088  | O        | 1.8269127357  | 0.0750397798  | -0.1088123302 |
|               | H         | -2.4265102030 | 0.9686370069  | -0.5392654402 | H                | -1.2165083239 | 0.9237020820  | 0.0640256105  | H        | -2.4383422531 | 0.4471259332  | -0.7250202015 |
|               | H         | -2.6822400387 | -0.2423186764 | 0.3874815336  | H                | -2.3722924204 | -0.6461431883 | 0.3271656869  | H        | 2.5541812647  | 0.4114474620  | -0.6420862933 |
| $3^3\text{A}$ | Nb        | 0.2521412493  | 0.3794119061  | -0.4482361348 | Nb               | 0.4870154023  | -0.2717897476 | 0.0127152699  | Nb       | 0.0494723161  | -0.2280620257 | 0.0009564423  |
|               | O         | 1.7123552412  | 0.7302215065  | 0.3479319649  | O                | -0.0919031730 | 1.4578103201  | -0.0443608128 | O        | -1.7448943557 | 0.2268972050  | -0.0009186513 |
|               | O         | -1.9791065131 | 0.3886223830  | -0.0392819203 | O                | -1.5896589732 | -0.2670541222 | -0.0407183975 | O        | 1.8468414892  | 0.2366805852  | -0.0010042725 |
|               | H         | -2.6894649592 | 0.1632086263  | -0.6511566017 | H                | -1.1912288724 | 0.9386395516  | 0.0059418235  | H        | -2.5370166298 | 0.7671106490  | -0.0031626686 |
|               | H         | -2.4001020182 | 0.6379305780  | 0.7910096919  | H                | -2.2910893837 | -0.6307800019 | 0.4997871170  | H        | 2.6120291903  | 0.8196060330  | -0.0033712743 |

**Table S14.** Harmonic vibrational frequencies (cm<sup>-1</sup>) of the optimal geometries given in Table S13.

|                       | Reactants                                                         | Transition States                                                  | Products                                                         |
|-----------------------|-------------------------------------------------------------------|--------------------------------------------------------------------|------------------------------------------------------------------|
| <b>1<sup>1</sup>A</b> | 107.2, 208.0, 372.2, 416.6, 611.8, 1027.1, 1733.2, 3888.5, 3968.3 | 1828.6i, 391.5, 550.2, 639.3, 727.0, 912.5, 1198.1, 1905.2, 3948.4 | 12.6, 527.4, 528.5, 580.2, 581.5, 791.5, 820.8, 3970.4, 4009.7   |
| <b>2<sup>1</sup>A</b> | 80.1, 122.4, 351.4, 378.9, 564.3, 1036.7, 1717.5, 3882.6, 3964.0  | N/A <sup>a</sup>                                                   | 71.2, 490.4, 491.3, 565.6, 566.3, 794.7, 812.0, 3978.4, 4013.4   |
| <b>3<sup>1</sup>A</b> | 89.3, 129.7, 338.2, 378.8, 555.4, 999.5, 1721.0, 3877.0, 3959.2   | 1123.6i, 485.3, 567.5, 714.2, 881.3, 919.5, 1183.4, 1997.7, 3944.1 | 71.6, 490.0, 491.2, 566.1, 566.7, 794.8, 812.0, 3978.3, 4013.5   |
| <b>1<sup>3</sup>A</b> | 102.6, 173.7, 365.1, 388.6, 575.8, 1029.6, 1715.4, 3880.2, 3962.8 | 1834.7i, 390.2, 551.6, 643.1, 692.0, 900.6, 1202.1, 1894.5, 3952.0 | 81.6, 486.4, 487.3, 564.9, 565.1, 792.5, 809.6, 3979.0, 4015.7   |
| <b>2<sup>3</sup>A</b> | 102.7, 109.7, 371.9, 411.7, 565.1, 975.7, 1714.6, 3849.3, 3932.2  | 1765.3i, 423.2, 489.7, 664.6, 780.3, 853.4, 1166.1, 1968.2, 3985.5 | 118.4, 540.3, 563.58, 571.3, 609.0, 788.5, 831.9, 3922.8, 3968.1 |
| <b>3<sup>3</sup>A</b> | 100.5, 199.0, 366.4, 386.0, 558.9, 974.7, 1712.7, 3855.5, 3938.9  | 1655.9i, 434.4, 521.8, 676.6, 719.4, 843.7, 1231.5, 1930.2, 3990.8 | 133.4, 562.1, 581.7, 583.3, 607.2, 789.6, 833.2, 3931.7, 3975.7  |

<sup>a</sup> Unavailable for technical issues.

**Table S15.** MRCI(+Q)/cc-pVTZ-PP(Nb) cc-pVTZ(H) aug-cc-pVTZ(O) electronic energies (a.u.) of optimal geometries of the fragments, reactants, transition states, and products of the NbO<sup>+</sup> + H<sub>2</sub>O → Nb(OH)<sub>2</sub><sup>+</sup> reaction for the first three singlets (1<sup>1</sup>A, 2<sup>1</sup>A, 3<sup>1</sup>A) and the first three triplets (1<sup>3</sup>A, 2<sup>3</sup>A, 3<sup>3</sup>A).

| State            | Fragments <sup>a</sup> |             | Intermediate |             | TS          |             | Products    |             |
|------------------|------------------------|-------------|--------------|-------------|-------------|-------------|-------------|-------------|
|                  | MRCI                   | MRCI+Q      | MRCI         | MRCI+Q      | MRCI        | MRCI+Q      | MRCI        | MRCI+Q      |
| 1 <sup>1</sup> A | -207.437395            | -207.499651 | -207.502974  | -207.565476 | -207.425659 | -207.489299 | -207.521206 | -207.581457 |
| 2 <sup>1</sup> A | -207.437296            | -207.499470 | -207.500663  | -207.562632 | -207.418661 | -207.481644 | -207.522424 | -207.579378 |
| 3 <sup>1</sup> A | -207.433886            | -207.497404 | -207.496433  | -207.559123 | -207.415976 | -207.479527 | -207.522387 | -207.579348 |
| 1 <sup>3</sup> A | -207.463409            | -207.525969 | -207.528576  | -207.590487 | -207.455043 | -207.517855 | -207.548155 | -207.605276 |
| 2 <sup>3</sup> A | -207.434255            | -207.497028 | -207.504313  | -207.564763 | -207.442919 | -207.504740 | -207.529095 | -207.590082 |
| 3 <sup>3</sup> A | -207.434044            | -207.496635 | -207.503729  | -207.564001 | -207.435611 | -207.497646 | -207.528384 | -207.589286 |

<sup>a</sup> Single point energy calculations of NbO<sup>+</sup> and H<sub>2</sub>O separated by a distance of 1,000 Å.

**Table S16.** DFT/MN15/cc-pVTZ-PP(Nb) cc-pVTZ(H) aug-cc-pVTZ(O, Cl, N) optimal geometries (Cartesian coordinates in Å), harmonic vibrational frequencies (cm<sup>-1</sup>, in brackets), and energies (total electronic energy, zero-point energy, free energy correction in a.u.) of the reactants, transition state, and products of the NbO<sup>+</sup> + H<sub>2</sub>O → [HO–Nb–OH]<sup>+</sup> and XNbO<sup>+</sup> + H<sub>2</sub>O → [XNb(OH)<sub>2</sub>]<sup>+</sup> reactions [X = Cl<sub>3</sub>, (NH<sub>3</sub>)Cl<sub>3</sub>, (NH<sub>3</sub>)<sub>2</sub>Cl<sub>3</sub>, (NH<sub>3</sub>)<sub>3</sub>Cl<sub>3</sub>].

|                                                                               | Reactants                                                                                                                                                                                                                                                                                                                                                                                                                                                 | Transition State                                                                                                                                                                                                                                                                                                                                                                                                                                                | Products                                                                                                                                                                                                                                                                                                                                                                                                                                                          |
|-------------------------------------------------------------------------------|-----------------------------------------------------------------------------------------------------------------------------------------------------------------------------------------------------------------------------------------------------------------------------------------------------------------------------------------------------------------------------------------------------------------------------------------------------------|-----------------------------------------------------------------------------------------------------------------------------------------------------------------------------------------------------------------------------------------------------------------------------------------------------------------------------------------------------------------------------------------------------------------------------------------------------------------|-------------------------------------------------------------------------------------------------------------------------------------------------------------------------------------------------------------------------------------------------------------------------------------------------------------------------------------------------------------------------------------------------------------------------------------------------------------------|
| <b>NbO<sup>+</sup>+H<sub>2</sub>O (Singlet)</b>                               | Nb 0.257720 -0.300594 -0.000064<br>O 1.079532 1.128402 -0.000023<br>O -1.825224 0.267253 0.000284<br>H -2.300626 0.579331 -0.785567<br>H -2.300356 0.579800 0.786112<br>(158.4, 226.9, 416.4, 443.8, 594.1, 1102.4, 1621.5, 3766.1, 3845.1)<br><i>-208.008216768, 0.027736, -0.000504</i>                                                                                                                                                                 | Nb 0.411943 -0.218715 0.002563<br>O -0.098175 1.439171 0.013430<br>O -1.582373 -0.348957 -0.089789<br>H -1.195077 0.909469 -0.029576<br>H -2.250219 -0.663850 0.535375<br>(1955.6i, 346.6, 514.2, 643.7, 675.7, 983.9, 1110.0, 1859.7, 3832.0)<br><i>-207.943680646, 0.022704, -0.004503</i>                                                                                                                                                                    | Nb 0.000021 -0.000678 -0.000002<br>O -1.844953 0.001391 0.000014<br>O 1.844867 0.001403 0.000013<br>H -2.810691 0.002742 -0.000068<br>H 2.810535 0.002679 -0.000064<br>(16.2i, 545.7, 548.2, 611.1, 611.1, 808.2, 812.1, 3871.6, 3881.5)<br><i>-208.025800169, 0.026631, 0.005119</i>                                                                                                                                                                             |
| <b>NbO<sup>+</sup>+H<sub>2</sub>O (Triplet)</b>                               | Nb 0.256084 -0.299493 -0.000017<br>O 1.104120 1.116193 -0.000225<br>O -1.838586 0.271825 0.000264<br>H -2.311796 0.587418 -0.785136<br>H -2.311904 0.587657 0.785501<br>(149.1, 196.4, 406.6, 427.7, 568.7, 1098.6, 1616.3, 3774.5, 3853.5)<br><i>-208.026702160, 0.027546, -0.001880</i>                                                                                                                                                                 | Nb 0.406197 -0.226317 0.002757<br>O -0.058703 1.444837 0.013056<br>O -1.597409 -0.328227 -0.093534<br>H -1.153427 0.940080 -0.036285<br>H -2.251766 -0.593953 0.567081<br>(1823.9i, 388.8, 516.6, 622.2, 669.1, 997.7, 1085.4, 1890.9, 3839.3)<br><i>-207.962660180, 0.022805, -0.005413</i>                                                                                                                                                                    | Nb 0.000021 -0.000673 -0.000002<br>O -1.849196 0.001390 0.000017<br>O 1.849107 0.001398 0.000017<br>H -2.814546 0.002668 -0.000084<br>H 2.814388 0.002626 -0.000083<br>(36.5, 545.4, 548.1, 610.0, 610.0, 802.0, 807.2, 3876.6, 3886.3)<br><i>-208.049640696, 0.026705, 0.002434</i>                                                                                                                                                                              |
| <b>NbO<sup>+</sup>+H<sub>2</sub>O (Quintet)</b>                               | Nb 0.138887 -0.182889 0.002024<br>O 1.893525 0.530044 -0.006299<br>O -1.980631 0.278136 -0.002061<br>H -2.505757 0.481628 -0.793791<br>H -2.491760 0.551362 0.777683<br>(45.3i, 103.3, 403.1, 421.9, 532.0, 728.7, 1607.7, 3752.4, 3830.7)<br><i>-207.894124414, 0.025925, -0.003573</i>                                                                                                                                                                  | Nb 0.549058 -0.069307 0.001519<br>O -0.908061 1.217530 0.029903<br>O -1.452200 -0.777210 -0.094753<br>H -1.721510 0.410719 -0.251409<br>H -1.907782 -1.091677 0.707927<br>(1822.6i, 402.5, 567.7, 607.0, 615.0, 699.2, 1129.6, 1906.9, 3747.9)<br><i>-207.854343480, 0.022043, -0.006779</i>                                                                                                                                                                    | Nb -0.074486 -0.076590 0.000120<br>O -1.850391 0.176131 -0.000090<br>O 2.211443 0.076985 -0.000602<br>H -2.791778 0.397754 -0.001372<br>H 2.957299 0.717494 0.001980<br>(45.7i, 62.8, 282.7, 339.7, 524.6, 530.5, 848.3, 3680.8, 3852.2)<br><i>-207.904251059, 0.023059, -0.006332</i>                                                                                                                                                                            |
| <b>(Cl)<sub>3</sub>NbO<sup>+</sup>+H<sub>2</sub>O (Doublet)</b>               | Nb -0.016725 0.000134 0.090801<br>O -0.218802 0.001042 1.924575<br>O 2.065577 0.013809 0.904562<br>H 2.506726 -0.778207 1.249761<br>H 2.489615 0.806147 1.269909<br>Cl 0.542088 1.935045 -0.867597<br>Cl -2.238472 -0.017703 0.035778<br>Cl 0.573748 -1.926297 -0.866747<br>(31.0, 89.7, 121.2, 121.8, 139.5, 175.1, 176.2, 205.2, 347.6, 370.6, 433.0, 458.7, 487.5, 608.9, 704.9, 1593.3, 3763.4, 3860.1)<br><i>-1588.52117022, 0.031183, -0.007227</i> | Nb 0.274925 -0.109809 -0.156017<br>O 0.871439 -0.620529 -1.716617<br>O 0.829616 -2.016182 0.059511<br>H 1.014110 -1.706581 -1.166866<br>H 0.608857 -2.828702 0.533354<br>Cl -1.520805 1.347640 -0.632892<br>Cl 1.760974 1.160421 0.887023<br>Cl -1.799188 -0.735639 0.939226<br>(1888.9i, 41.7, 112.0, 120.2, 137.7, 181.4, 215.2, 267.2, 351.6, 383.3, 456.7, 492.3, 681.9, 726.2, 978.5, 999.3, 1859.3, 3855.5)<br><i>-1588.48032957, 0.027019, -0.009796</i> | Nb -0.245710 -0.303060 0.119938<br>O -0.440774 -0.542803 1.886395<br>O -0.587414 -1.909380 -0.638226<br>H -0.674998 -0.862508 2.769672<br>H -0.563017 -2.729200 -1.151158<br>Cl -1.995709 0.871635 -0.614431<br>Cl 2.067778 -0.529138 -0.488042<br>Cl 1.077202 1.753658 0.130632<br>(28.5, 126.5, 149.2, 172.3, 194.8, 216.4, 250.9, 255.5, 307.6, 371.9, 391.8, 423.8, 449.6, 489.0, 836.8, 872.3, 3836.5, 3851.1)<br><i>-1588.54884161, 0.030128, -0.007233</i> |
| <b>(NH<sub>3</sub>)Cl<sub>3</sub>NbO<sup>+</sup>+H<sub>2</sub>O (Doublet)</b> | Nb -0.082567 -0.000052 -0.094886<br>O 0.260341 0.000196 -1.850277                                                                                                                                                                                                                                                                                                                                                                                         | Cl 2.099759 -0.616065 0.565566<br>Cl -2.099856 -0.615735 0.565620                                                                                                                                                                                                                                                                                                                                                                                               | Nb 0.244107 -0.324551 -0.165852<br>O 0.576655 -2.042281 0.327809                                                                                                                                                                                                                                                                                                                                                                                                  |

|                                                                                                   |                                                                                                                                                                                                                                                                                                                                                                                                                                                                                                                                                                                                                                                                                                                                                                                                                                                                                                                                                                     |                                                                                                                                                                                                                                                                                                                                                                                                                                                                                                                                                                                                                                                                                                                                                                                                                                                                                                                                                                 |                                                                                                                                                                                                                                                                                                                                                                                                                                                                                                                                                                                                                                                                                                                                                                                                                                                                                                                                                           |
|---------------------------------------------------------------------------------------------------|---------------------------------------------------------------------------------------------------------------------------------------------------------------------------------------------------------------------------------------------------------------------------------------------------------------------------------------------------------------------------------------------------------------------------------------------------------------------------------------------------------------------------------------------------------------------------------------------------------------------------------------------------------------------------------------------------------------------------------------------------------------------------------------------------------------------------------------------------------------------------------------------------------------------------------------------------------------------|-----------------------------------------------------------------------------------------------------------------------------------------------------------------------------------------------------------------------------------------------------------------------------------------------------------------------------------------------------------------------------------------------------------------------------------------------------------------------------------------------------------------------------------------------------------------------------------------------------------------------------------------------------------------------------------------------------------------------------------------------------------------------------------------------------------------------------------------------------------------------------------------------------------------------------------------------------------------|-----------------------------------------------------------------------------------------------------------------------------------------------------------------------------------------------------------------------------------------------------------------------------------------------------------------------------------------------------------------------------------------------------------------------------------------------------------------------------------------------------------------------------------------------------------------------------------------------------------------------------------------------------------------------------------------------------------------------------------------------------------------------------------------------------------------------------------------------------------------------------------------------------------------------------------------------------------|
|                                                                                                   | <p>O -2.200260 -0.001652 -0.757006<br/> H -2.628861 -0.798249 -1.104995<br/> H -2.630040 0.794277 -1.105067<br/> Cl -0.682276 2.117033 0.492454<br/> Cl 2.223103 0.001492 -0.624951<br/> Cl -0.679095 -2.117984 0.492601<br/> N 0.903818 0.000811 1.982171<br/> H 0.206565 0.000391 2.728333<br/> H 1.489811 0.824870 2.116602<br/> H 1.490983 -0.822387 2.116760</p> <p>(63.2, 65.4, 150.4, 156.0, 164.8, 170.1, 190.9, 192.4, 213.3, 233.1, 297.5, 333.5, 362.0, 382.8, 397.1, 419.1, 446.4, 631.3, 662.0, 684.5, 767.8, 1291.8, 1579.9, 1609.3, 1611.6, 3450.8, 3558.8, 3569.6, 3770.4, 3873.5)<br/> -1645.09757081, 0.071305, 0.031937</p>                                                                                                                                                                                                                                                                                                                      | <p>Cl 0.000171 2.090018 -0.745614<br/> N 0.000127 0.882838 2.025069<br/> H 0.000298 0.184377 2.770376<br/> H -0.823364 1.469528 2.162435<br/> H 0.823535 1.469695 2.162216<br/> O -0.000179 -2.057689 -0.583619<br/> Nb -0.000012 -0.064486 -0.053638<br/> H -0.000154 -1.568042 -1.718233<br/> O -0.000071 -0.414124 -2.046234<br/> H 0.000022 0.093323 -2.869000</p> <p>(1456.8i, 73.9, 77.6, 118.7, 141.8, 157.2, 165.9, 173.2, 209.4, 219.4, 354.1, 410.6, 413.4, 425.2, 457.5, 472.4, 550.3, 673.8, 704.8, 721.6, 848.0, 942.7, 1305.7, 1609.1, 1611.9, 1873.5, 3448.4, 3555.3, 3564.9, 3846.4)<br/> -1645.05926592, 0.066356, 0.027746</p>                                                                                                                                                                                                                                                                                                                | <p>O 0.147557 -0.451388 -1.970913<br/> H 0.564454 -2.991295 0.502167<br/> H -0.000963 -0.401284 -2.923858<br/> Cl 2.216658 0.760211 0.052460<br/> Cl -2.189860 -0.495753 0.153567<br/> Cl -1.053524 1.807644 -0.194529<br/> N 0.111680 0.119456 2.107199<br/> H 0.154880 1.121561 2.289324<br/> H 0.898071 -0.306336 2.597192<br/> H -0.745952 -0.228628 2.534085</p> <p>(68.8, 94.2, 124.0, 136.0, 164.9, 176.4, 184.3, 203.1, 223.5, 230.8, 246.5, 323.0, 347.0, 389.6, 410.5, 420.6, 447.7, 501.2, 655.8, 666.7, 820.6, 830.5, 1284.8, 1610.3, 1619.9, 3462.6, 3573.7, 3576.5, 3868.7, 3881.2)<br/> -1645.12517118, 0.069582, 0.030291</p>                                                                                                                                                                                                                                                                                                             |
| (NH <sub>3</sub> ) <sub>2</sub> (Cl) <sub>3</sub> NbO <sup>+</sup> +H <sub>2</sub> O<br>(Doublet) | <p>Nb -0.072681 0.001371 -0.146099<br/> O 0.713793 -0.098041 -1.755822<br/> O -1.450620 1.037588 -1.558093<br/> H -1.086218 1.636854 -2.226106<br/> H -2.349684 1.296205 -1.307760<br/> Cl -2.212334 -0.745905 0.457589<br/> Cl 0.175516 2.103052 0.739765<br/> Cl 2.402805 -0.254781 -0.182861<br/> N 0.404615 -0.512405 2.056884<br/> H 0.588214 -1.487676 2.283426<br/> H -0.383360 -0.209123 2.630144<br/> H 1.219504 0.027120 2.347780<br/> N 0.174078 -2.290640 -0.265544<br/> H 1.156233 -2.564585 -0.279969<br/> H -0.218739 -2.557119 -1.169318<br/> H -0.324012 -2.833182 0.437411</p> <p>(60.3, 78.3, 101.6, 129.8, 138.0, 166.9, 182.0, 191.4, 205.6, 209.9, 229.0, 232.7, 246.5, 296.4, 312.2, 336.4, 346.7, 387.4, 395.4, 397.4, 428.2, 627.1, 641.5, 665.1, 672.8, 702.6, 780.0, 1269.7, 1287.0, 1561.7, 1602.0, 1605.6, 1615.3, 1624.4, 3454.6, 3459.3, 3560.6, 3567.0, 3584.7, 3586.6, 3773.5, 3886.1)<br/> -1701.65680694, 0.110717, 0.069076</p> | <p>Cl 2.250442 -0.427979 0.057048<br/> Cl -2.250303 -0.428698 0.057055<br/> Cl -0.000390 2.295788 0.153924<br/> N 0.000330 -2.087813 0.964520<br/> H 0.000409 -2.762756 0.198991<br/> H -0.831311 -2.272239 1.523231<br/> H 0.832053 -2.271995 1.523189<br/> O 0.000238 -1.521184 -1.590299<br/> Nb 0.000003 -0.012639 -0.093075<br/> H 0.000089 -0.525003 -2.318347<br/> O -0.000085 0.618806 -2.019457<br/> H -0.000209 1.481731 -2.454524<br/> N -0.000036 0.386755 2.184649<br/> H -0.816134 0.962918 2.393031<br/> H 0.815833 0.963256 2.392992<br/> H 0.000143 -0.396159 2.834902</p> <p>(1304.4i, 41.6, 77.8, 104.7, 124.9, 146.7, 156.7, 166.6, 182.1, 229.2, 243.3, 249.8, 297.9, 325.1, 349.0, 369.3, 376.0, 409.3, 425.1, 452.4, 545.7, 660.3, 669.6, 707.5, 736.4, 741.1, 854.5, 873.4, 1270.6, 1302.2, 1598.6, 1606.2, 1616.6, 1643.3, 1899.7, 3454.4, 3458.4, 3561.1, 3562.6, 3584.2, 3585.9, 3846.4)<br/> -1701.62180454, 0.105948, 0.064880</p> | <p>Nb 0.144669 0.045065 -0.217106<br/> O 1.174565 0.386908 -1.750662<br/> O -1.266280 -0.177931 -1.649871<br/> H 0.887701 0.240666 -2.662896<br/> H -1.995404 0.432349 -1.854305<br/> Cl -2.131618 -0.805041 0.366594<br/> Cl -0.511301 2.200369 0.315995<br/> Cl 0.991028 -2.073580 0.086622<br/> N 0.118549 -0.142859 2.123919<br/> H -0.333228 -1.024628 2.364753<br/> H -0.423117 0.612213 2.544026<br/> H 1.032141 -0.164007 2.571791<br/> N 2.188024 0.850777 0.502190<br/> H 2.547182 1.361114 -0.304601<br/> H 2.850878 0.101167 0.698652<br/> H 2.172281 1.496508 1.288842</p> <p>(38.2, 79.0, 112.9, 119.9, 132.3, 141.8, 176.4, 195.3, 201.6, 210.5, 226.7, 263.0, 313.2, 338.1, 344.7, 397.0, 400.2, 403.2, 443.6, 477.2, 516.3, 601.9, 619.6, 637.7, 655.8, 695.3, 705.8, 738.9, 1265.7, 1281.7, 1600.0, 1610.2, 1623.3, 1635.3, 3458.9, 3461.1, 3568.3, 3570.8, 3586.6, 3589.8, 3785.1, 3842.9)<br/> -1701.65545347, 0.109502, 0.067829</p> |
| (NH <sub>3</sub> ) <sub>3</sub> (Cl) <sub>3</sub> NbO <sup>+</sup> +H <sub>2</sub> O<br>(Doublet) | <p>Nb 0.030545 -0.073898 -0.112443<br/> O -0.725302 -0.566529 -1.686171<br/> O 1.408408 1.009340 -1.632795<br/> H 1.917193 1.696381 -1.171499<br/> H 0.852046 1.457054 -2.290846<br/> Cl -2.466800 -0.438450 -0.192221</p>                                                                                                                                                                                                                                                                                                                                                                                                                                                                                                                                                                                                                                                                                                                                          | <p>Nb 0.001937 -0.065686 -0.098899<br/> O -1.365321 -1.528810 -0.666469<br/> O -0.923588 0.220598 -1.967012<br/> H -1.285672 1.078609 -2.223347<br/> H -1.539582 -0.736010 -1.568566<br/> Cl -2.256337 0.163408 0.738804</p>                                                                                                                                                                                                                                                                                                                                                                                                                                                                                                                                                                                                                                                                                                                                    | <p>Nb 0.007589 -0.097834 -0.190334<br/> O -0.597865 -0.099829 -1.967319<br/> O 0.915614 1.640513 -1.001504<br/> H 1.490460 2.108808 -0.369491<br/> H -0.238405 0.401732 -2.712362<br/> Cl -2.194174 -1.044176 0.017450</p>                                                                                                                                                                                                                                                                                                                                                                                                                                                                                                                                                                                                                                                                                                                                |

|                                                                                                 |                                                                                                                                                                                                                                                                                                                                                                                                                                                                                                                                                                                                                                                                                                                                                                                                                                                                                                                                                     |                                                                                                                                                                                                                                                                                                                                                                                                                                                                                                                                                                                                                                                                                                                                                                                                                                                                                                                                                  |                                                                                                                                                                                                                                                                                                                                                                                                                                                                                                                                                                                                                                                                                                                                                                                                                                                                                                                                                 |
|-------------------------------------------------------------------------------------------------|-----------------------------------------------------------------------------------------------------------------------------------------------------------------------------------------------------------------------------------------------------------------------------------------------------------------------------------------------------------------------------------------------------------------------------------------------------------------------------------------------------------------------------------------------------------------------------------------------------------------------------------------------------------------------------------------------------------------------------------------------------------------------------------------------------------------------------------------------------------------------------------------------------------------------------------------------------|--------------------------------------------------------------------------------------------------------------------------------------------------------------------------------------------------------------------------------------------------------------------------------------------------------------------------------------------------------------------------------------------------------------------------------------------------------------------------------------------------------------------------------------------------------------------------------------------------------------------------------------------------------------------------------------------------------------------------------------------------------------------------------------------------------------------------------------------------------------------------------------------------------------------------------------------------|-------------------------------------------------------------------------------------------------------------------------------------------------------------------------------------------------------------------------------------------------------------------------------------------------------------------------------------------------------------------------------------------------------------------------------------------------------------------------------------------------------------------------------------------------------------------------------------------------------------------------------------------------------------------------------------------------------------------------------------------------------------------------------------------------------------------------------------------------------------------------------------------------------------------------------------------------|
|                                                                                                 | Cl -0.550583 2.206222 -0.004048<br>Cl 2.094703 0.117270 1.131029<br>N -0.303779 -2.156078 0.795729<br>H -0.477501 -2.816649 0.039103<br>H -1.145432 -2.170834 1.368985<br>H 0.481885 -2.492361 1.351963<br>N 1.542626 -1.579779 -1.101454<br>H 2.191003 -0.989138 -1.619359<br>H 1.084818 -2.190655 -1.776838<br>H 2.106278 -2.129031 -0.455840<br>N -0.644063 0.288871 2.095220<br>H -0.151614 1.138321 2.370342<br>H -0.410284 -0.418452 2.789328<br>H -1.643519 0.485858 2.139182<br>(79.1, 104.6, 117.3, 134.0, 146.3, 152.1, 157.4, 186.6, 199.2, 210.0, 223.5, 236.9, 247.1, 249.6, 253.6, 263.7, 288.5, 309.4, 326.0, 341.0, 369.6, 380.5, 393.6, 401.4, 618.1, 626.3, 638.7, 668.6, 670.3, 687.2, 702.0, 717.6, 763.8, 1245.1, 1262.4, 1277.3, 1569.8, 1585.8, 1597.5, 1604.0, 1617.2, 1632.9, 1647.3, 3454.9, 3458.0, 3459.1, 3569.4, 3575.7, 3578.8, 3581.4, 3583.4, 3591.4, 3746.8, 3839.0)<br><i>-1758.19943094, 0.151136, 0.108443</i> | Cl 0.408177 2.177799 -0.596813<br>Cl 2.336116 -0.235276 0.486175<br>N 0.039799 -1.787637 1.428201<br>H 0.210304 -2.654939 0.921188<br>H -0.887923 -1.883850 1.842487<br>H 0.750132 -1.716370 2.154244<br>N 1.012426 -1.416036 -1.638133<br>H 1.617027 -0.790553 -2.174215<br>H 0.350211 -1.837884 -2.288821<br>H 1.620256 -2.132408 -1.245066<br>N 0.165858 0.986317 1.957838<br>H 1.121166 1.323537 2.076604<br>H -0.091548 0.434442 2.774035<br>H -0.454351 1.794919 1.939968<br>(1345.1i, 35.2, 113.1, 119.1, 146.2, 153.5, 176.3, 195.1, 217.6, 232.6, 234.8, 238.2, 257.2, 262.8, 280.0, 295.6, 310.8, 335.6, 340.4, 367.6, 400.8, 407.0, 470.1, 501.3, 523.9, 632.1, 680.7, 696.3, 724.8, 728.1, 749.5, 764.5, 810.3, 1251.3, 1264.0, 1286.4, 1298.3, 1590.2, 1594.5, 1599.9, 1604.6, 1617.4, 1622.4, 1828.1, 3446.2, 3453.4, 3454.1, 3556.0, 3568.6, 3571.5, 3582.2, 3585.5, 3587.8, 3853.7)<br><i>-1758.16982784, 0.147209, 0.105300</i> | Cl -0.988502 2.137031 0.143697<br>Cl 2.009377 0.193359 1.197000<br>N 0.334141 -2.281446 0.415305<br>H 0.139268 -2.899738 -0.372825<br>H -0.366542 -2.524253 1.115083<br>H 1.261985 -2.486030 0.784851<br>N 1.799081 -0.893649 -1.429195<br>H 2.173505 -0.057884 -1.879043<br>H 1.523785 -1.539061 -2.168225<br>H 2.562897 -1.289881 -0.884232<br>N -0.610972 0.022370 2.098989<br>H -0.190696 0.854294 2.510540<br>H -0.293977 -0.761990 2.665976<br>H -1.625069 0.083153 2.179828<br>(67.9, 74.9, 110.4, 149.2, 177.0, 179.4, 191.3, 204.7, 223.5, 231.9, 236.2, 252.2, 263.6, 269.4, 276.8, 293.5, 323.6, 340.6, 347.7, 377.3, 382.3, 398.0, 449.6, 485.8, 562.9, 599.1, 633.8, 660.9, 673.5, 691.9, 710.4, 724.7, 753.5, 815.6, 1253.4, 1264.7, 1280.7, 1583.3, 1599.2, 1603.9, 1609.3, 1627.0, 1643.4, 3448.5, 3451.1, 3456.0, 3559.6, 3563.6, 3576.6, 3579.6, 3581.7, 3586.2, 3751.1, 3835.3)<br><i>-1758.18348596, 0.150331, 0.108250</i> |
| <b>(NH<sub>3</sub>)<sub>4</sub>(Cl)<sub>3</sub>NbO<sup>+</sup>+H<sub>2</sub>O<br/>(Doublet)</b> | Nb -0.256986 0.011341 -0.016187<br>O 0.799646 0.129561 -1.456378<br>Cl -2.041930 -1.251059 -1.063655<br>Cl 1.078229 2.209635 -0.474691<br>Cl 1.344709 -0.077786 1.751232<br>N -1.383323 -1.289279 1.721209<br>H -1.496232 -2.241029 1.378871<br>H -2.331511 -0.972999 1.916219<br>H -0.859830 -1.318278 2.595023<br>N 0.647972 -2.073545 -0.197442<br>H 1.641818 -1.916570 -0.441340<br>H 0.208652 -2.605476 -0.946564<br>H 0.635988 -2.629305 0.654208<br>N -1.624504 1.482034 -1.209641<br>H -1.408618 2.470504 -1.094924<br>H -2.624984 1.321574 -1.113594<br>H -1.385482 1.238233 -2.170986<br>N -1.164939 1.524067 1.528795<br>H -2.176378 1.638361 1.561939<br>H -0.749959 2.434185 1.328832<br>H -0.835250 1.261130 2.456604                                                                                                                                                                                                                 | Nb -0.183934 -0.009436 -0.079133<br>O 0.809523 -0.427990 -1.490045<br>Cl 2.396077 -0.406790 0.899670<br>Cl -1.836987 -1.325931 -1.211726<br>Cl -1.746505 1.744101 -0.440379<br>N 0.119295 1.001900 2.010999<br>H 1.036970 1.435613 2.093864<br>H 0.038492 0.353084 2.790508<br>H -0.599038 1.716482 2.126032<br>N 1.042026 1.936637 -0.459846<br>H 0.848567 2.151035 -1.437832<br>H 2.049512 1.796867 -0.366436<br>H 0.751230 2.756678 0.067725<br>N 0.063462 -2.098271 0.828117<br>H -0.822799 -2.599517 0.824601<br>H 0.508298 -2.164652 1.741446<br>H 0.679308 -2.575390 0.168984<br>N -2.158589 -0.442190 1.592032<br>H -2.132477 -0.977731 2.458020<br>H -2.783102 -0.928391 0.948426<br>H -2.617591 0.443509 1.795750                                                                                                                                                                                                                      | Nb -0.162739 -0.024713 -0.035507<br>O 0.727870 -0.678382 -1.532597<br>Cl 2.080582 -0.366075 1.066455<br>Cl -1.982435 -1.245898 -1.044973<br>Cl -1.722989 1.738671 -0.482706<br>N 0.123432 1.483615 1.771376<br>H 0.992710 1.997786 1.647958<br>H 0.232807 1.010017 2.665730<br>H -0.644831 2.151590 1.828810<br>N 1.070159 1.760232 -0.834982<br>H 0.844307 1.793894 -1.828953<br>H 2.076793 1.602600 -0.748471<br>H 0.818560 2.672861 -0.462202<br>N 0.069319 -2.261872 0.618842<br>H -0.797993 -2.789849 0.542939<br>H 0.524240 -2.434876 1.512346<br>H 0.689769 -2.617273 -0.107472<br>N -1.708291 -0.466739 1.741122<br>H -1.390305 -0.682236 2.684047<br>H -2.295637 -1.232562 1.413975<br>H -2.325801 0.343845 1.787479                                                                                                                                                                                                                   |



|                                                                                                                                                                                                                                                                                                                                                                                                                                                                                                        |                                                                                                                                                                                                                                                                                                                                                                                                                                                                                                          |                                                                                                                                                                                                                                                                                                                                                                                                                                                                                                       |
|--------------------------------------------------------------------------------------------------------------------------------------------------------------------------------------------------------------------------------------------------------------------------------------------------------------------------------------------------------------------------------------------------------------------------------------------------------------------------------------------------------|----------------------------------------------------------------------------------------------------------------------------------------------------------------------------------------------------------------------------------------------------------------------------------------------------------------------------------------------------------------------------------------------------------------------------------------------------------------------------------------------------------|-------------------------------------------------------------------------------------------------------------------------------------------------------------------------------------------------------------------------------------------------------------------------------------------------------------------------------------------------------------------------------------------------------------------------------------------------------------------------------------------------------|
| O 3.285366 -1.337543 -1.013907                                                                                                                                                                                                                                                                                                                                                                                                                                                                         | H 1.947933 -0.277561 -1.527969                                                                                                                                                                                                                                                                                                                                                                                                                                                                           | H 1.690164 -0.574631 -1.694365                                                                                                                                                                                                                                                                                                                                                                                                                                                                        |
| H 4.211396 -1.495492 -0.804842                                                                                                                                                                                                                                                                                                                                                                                                                                                                         | O 3.138945 0.048765 -1.279521                                                                                                                                                                                                                                                                                                                                                                                                                                                                            | O 3.383407 -0.002198 -1.236154                                                                                                                                                                                                                                                                                                                                                                                                                                                                        |
| H 3.223119 -0.462330 -1.413013                                                                                                                                                                                                                                                                                                                                                                                                                                                                         | H 3.770916 -0.689328 -1.289855                                                                                                                                                                                                                                                                                                                                                                                                                                                                           | H 4.107294 -0.543819 -0.869719                                                                                                                                                                                                                                                                                                                                                                                                                                                                        |
| (43.6, 60.0, 70.9, 108.9, 109.2, 127.3, 129.9, 151.5, 162.2, 172.6, 173.6, 193.7, 196.7, 203.5, 210.7, 216.9, 231.5, 241.5, 243.5, 262.1, 275.8, 288.2, 300.2, 320.4, 327.2, 346.4, 360.4, 373.0, 398.3, 411.8, 547.3, 594.7, 625.5, 642.3, 693.5, 707.9, 732.2, 768.1, 808.5, 1225.5, 1246.2, 1270.3, 1318.8, 1578.4, 1580.5, 1596.3, 1601.5, 1612.2, 1621.6, 1624.7, 1645.4, 1649.9, 3244.0, 3453.3, 3460.4, 3461.2, 3514.9, 3563.3, 3571.1, 3582.6, 3583.8, 3588.7, 3593.5, 3597.6, 3850.6, 3961.1) | (921.5i, 42.7, 71.7, 100.5, 111.3, 115.8, 145.8, 150.2, 163.6, 177.2, 184.2, 210.0, 218.4, 232.9, 245.0, 251.4, 263.6, 271.0, 279.3, 291.7, 303.9, 318.2, 326.4, 335.8, 358.5, 386.4, 400.4, 518.7, 538.9, 549.7, 592.9, 605.9, 662.4, 669.8, 694.9, 706.4, 721.9, 781.0, 934.0, 1215.4, 1243.8, 1265.9, 1271.0, 1276.5, 1399.5, 1578.6, 1595.9, 1598.8, 1610.2, 1617.3, 1623.8, 1632.9, 1653.2, 3445.2, 3449.1, 3459.7, 3460.0, 3559.6, 3559.6, 3569.5, 3577.8, 3585.0, 3586.1, 3589.3, 3592.1, 3802.8) | (46.5, 70.9, 93.6, 104.4, 123.3, 145.4, 164.2, 166.7, 193.6, 197.7, 212.3, 219.2, 230.2, 233.0, 252.0, 253.9, 265.8, 273.4, 284.6, 296.3, 311.0, 322.5, 324.3, 346.8, 350.7, 374.6, 380.0, 388.9, 430.6, 582.5, 594.3, 660.6, 670.6, 698.4, 701.6, 723.4, 726.8, 735.4, 761.3, 820.8, 1236.6, 1252.5, 1265.2, 1282.4, 1573.6, 1589.6, 1601.4, 1607.3, 1621.0, 1623.7, 1644.8, 1658.0, 3431.3, 3452.5, 3458.7, 3461.0, 3540.9, 3552.4, 3560.8, 3578.1, 3582.8, 3583.8, 3586.0, 3588.0, 3596.2, 3767.3) |
| <i>-1814.73726218, 0.187787, 0.139816</i>                                                                                                                                                                                                                                                                                                                                                                                                                                                              | <i>-1814.70455229, 0.183965, 0.138412</i>                                                                                                                                                                                                                                                                                                                                                                                                                                                                | <i>-1814.71067601, 0.187785, 0.141951</i>                                                                                                                                                                                                                                                                                                                                                                                                                                                             |

**Table S17.** DFT/MN15/cc-pVTZ-PP(Zr) cc-pVTZ(H) aug-cc-pVTZ(C, O) optimal geometries (Cartesian coordinates in Å), harmonic vibrational frequencies (cm<sup>-1</sup>, in brackets), and energies (total electronic energy, zero-point energy, free energy correction in a.u.) of the reactants, transition state, and products of the ZrO<sup>+</sup> + CH<sub>4</sub> → [HO-Zr-CH<sub>3</sub>]<sup>+</sup> reaction.

| Spin    | Reactants                                                                                                                                                                                                                                                                                                                                                                                               | Transition state                                                                                                                                                                                                                                                                                                                                                                                         | Products                                                                                                                                                                                                                                                                                                                                                                                              |
|---------|---------------------------------------------------------------------------------------------------------------------------------------------------------------------------------------------------------------------------------------------------------------------------------------------------------------------------------------------------------------------------------------------------------|----------------------------------------------------------------------------------------------------------------------------------------------------------------------------------------------------------------------------------------------------------------------------------------------------------------------------------------------------------------------------------------------------------|-------------------------------------------------------------------------------------------------------------------------------------------------------------------------------------------------------------------------------------------------------------------------------------------------------------------------------------------------------------------------------------------------------|
| Doublet | Zr 0.313623 -0.317005 0.000001<br>O 1.017121 1.220129 -0.000002<br>C -2.051909 0.279529 0.000007<br>H -3.031558 0.750204 -0.000089<br>H -2.220738 -0.802598 0.000201<br>H -1.559081 0.646995 -0.924168<br>H -1.559062 0.647376 0.924004<br>(115.3, 162.1, 275.7, 335.3, 488.5, 1041.8, 1272.0, 1312.2, 1341.7,<br>1518.7, 1527.7, 2863.5, 2963.4, 3090.2, 3181.8)<br>-162.231281875, 0.048958, 0.019273 | Zr 0.000000 0.496544 0.000000<br>O 1.372554 -0.623504 0.000000<br>C -1.146778 -1.428915 0.000000<br>H -0.943749 -2.500027 0.000000<br>H -1.752809 -1.221492 0.894249<br>H 0.349602 -1.357210 0.000000<br>H -1.752809 -1.221492 -0.894249<br>(1647.9i, 132.2, 288.0, 306.6, 527.7, 740.5, 975.6, 1106.4, 1223.2,<br>1396.9, 1397.6, 1939.4, 2986.1, 3046.7, 3142.3)<br>-162.177905131, 0.043762, 0.014795 | Zr 0.097754 -0.401935 -0.000236<br>O 1.340680 0.948044 0.000080<br>C -1.732550 0.688410 -0.001628<br>H 1.928147 1.714011 -0.000608<br>H -2.582345 -0.004014 -0.041087<br>H -1.785304 1.369593 -0.855754<br>H -1.800811 1.282986 0.916016<br>(21.1i, 164.1, 299.9, 422.4, 485.1, 487.7, 553.5, 821.2, 1160.5,<br>1363.2, 1375.1, 3010.9, 3094.2, 3110.2, 3878.9)<br>-162.238160324, 0.046080, 0.017176 |
| Quartet | Zr -0.211521 -0.322968 -0.000006<br>O -1.626427 1.006764 0.000033<br>C 2.131685 0.476004 0.000087<br>H 3.134069 0.895708 -0.000955<br>H 2.049508 -0.115960 -0.925409<br>H 2.051013 -0.115544 0.925871<br>H 1.447574 1.344398 -0.000055<br>(34.2, 140.5, 258.8, 285.5, 395.8, 691.6, 1251.8, 1317.5, 1327.4, 1492.7,<br>1525.0, 2907.6, 3019.4, 3043.7, 3182.3)<br>-162.102223499, 0.047554, 0.015848    | Zr -0.603854 -0.173638 0.000354<br>O 0.423931 1.405499 -0.001707<br>C 2.088645 -0.466035 0.008595<br>H 2.850275 -0.248895 -0.733416<br>H 2.440447 -0.583156 1.026296<br>H 1.468704 0.635449 0.005790<br>H 1.471398 -1.305674 -0.350737<br>(1467.8i, 91.0, 174.9, 366.7, 437.3, 666.6, 757.2, 1005.3, 1239.2,<br>1335.0, 1387.0, 1429.2, 2975.0, 3159.8, 3252.5)<br>-162.087587982, 0.041637, 0.011255    | Zr 0.257951 -0.416496 0.000042<br>O 1.005768 1.272413 -0.000041<br>C -2.165825 0.471536 -0.000027<br>H 1.411195 2.146386 0.000152<br>H -2.629143 -0.508649 -0.017154<br>H -2.068715 1.019492 -0.926954<br>H -2.082583 0.994077 0.942757<br>(53.0i, 96.1, 234.6, 283.5, 302.0, 417.2, 472.6, 795.3, 906.7, 1372.8,<br>1389.2, 3100.9, 3264.3, 3292.4, 3905.2)<br>-162.157946464, 0.045182, 0.014501    |

**Table S18.** Energy comparison between MRCI+Q and DFT/MN15 for the  $\text{MO}^+ + \text{H}_2\text{X}$  reactions. The aug-cc-pVTZ-PP basis set is used for metals, cc-pVTZ for H, and aug-cc-pVTZ for O and S. R, IC, TS, and P stands for the corresponding reactants ( $\text{MO}^+ + \text{H}_2\text{X}$ ), interacting complex ( $[\text{H}_2\text{X}\dots\text{MO}]^+$ ), transition state, and products  $[\text{HX}-\text{M}-\text{OH}]^+$ , respectively.

| Spin Multiplicity                       | Species | MRCI+Q | MN15   | Difference |
|-----------------------------------------|---------|--------|--------|------------|
| <b>ZrO<sup>+</sup> + H<sub>2</sub>O</b> |         |        |        |            |
| Doublet                                 | R       | 0.00   | 0.00   | 0.00       |
|                                         | IC      | -40.71 | -47.52 | 6.81       |
|                                         | TS      | -14.05 | -24.55 | 10.50      |
|                                         | P       | -60.29 | -76.66 | 16.37      |
| Quartet                                 | R       | 77.05  | 85.19  | -8.14      |
|                                         | IC      | 36.88  | 31.42  | 5.46       |
|                                         | TS      | 66.50  | 54.83  | 11.67      |
|                                         | P       | 33.16  | 29.86  | 3.30       |
| <b>ZrO<sup>+</sup> + H<sub>2</sub>S</b> |         |        |        |            |
| Doublet                                 | R       | 0.00   | 0.00   | 0.00       |
|                                         | IC      | -35.84 | -36.37 | 0.53       |
|                                         | TS      | -9.69  | -16.58 | 6.89       |
|                                         | P       | -74.97 | -60.73 | -14.24     |
| Quartet                                 | R       | 76.16  | 85.19  | -9.03      |
|                                         | IC      | 45.10  | 38.26  | 6.84       |
|                                         | TS      | 57.24  | 44.74  | 12.50      |
|                                         | P       | -19.14 | -2.65  | -16.49     |
| <b>NbO<sup>+</sup> + H<sub>2</sub>O</b> |         |        |        |            |
| Singlet                                 | R       | 16.51  | 15.57  | 0.94       |
|                                         | IC      | -24.79 | -34.09 | 9.30       |
|                                         | TS      | 23.01  | 6.40   | 16.61      |
|                                         | P       | -33.50 | -45.13 | 11.63      |

|                                         |    |        |        |       |
|-----------------------------------------|----|--------|--------|-------|
| Triplet                                 | R  | 0.00   | 0.00   | 0.00  |
|                                         | IC | -40.49 | -45.69 | 5.20  |
|                                         | TS | 5.09   | -5.51  | 10.60 |
|                                         | P  | -49.77 | -60.09 | 10.32 |
| Quintet                                 | R  | 102.69 | 87.41  | 15.28 |
|                                         | IC | 80.29  | 37.50  | 42.79 |
|                                         | TS | 84.90  | 62.46  | 22.44 |
|                                         | P  | 39.87  | 31.15  | 8.72  |
| <b>NbO<sup>+</sup> + H<sub>2</sub>S</b> |    |        |        |       |
| Singlet                                 | R  | 16.84  | 15.57  | 1.27  |
|                                         | IC | -21.07 | -25.59 | 4.52  |
|                                         | TS | 18.44  | 6.23   | 12.21 |
|                                         | P  | -18.50 | -36.29 | 17.79 |
| Triplet                                 | R  | 0.00   | 0.00   | 0.00  |
|                                         | IC | -35.32 | -41.15 | 5.83  |
|                                         | TS | 3.98   | -11.20 | 15.18 |
|                                         | P  | -34.23 | -48.44 | 14.21 |
| Quintet                                 | R  | 96.07  | 87.41  | 8.66  |
|                                         | IC | 55.51  | 45.97  | 9.54  |
|                                         | TS | 63.41  | 49.12  | 14.29 |
|                                         | P  | 11.48  | 2.08   | 9.40  |

**Table S19.** Relative ZPE-corrected ( $\Delta E_{\text{ZPE}}$ ) and free ( $\Delta G$ ) energies of all intermediate and transition state structures for the reaction of H<sub>2</sub>S and H<sub>2</sub>O with bare and ligated ZrO<sup>+</sup> and NbO<sup>+</sup> units. [Zr]/[Nb] denotes the metal-ligands combination, and A represents an ammonia molecule. The radical high-spin state is listed for the bare units. Compare to Table 1 of the manuscript.

| Species                               | [Zr]/[Nb] compound      |                    |                     |                                  |                                  |            |                    |                     |                                  |                                  |
|---------------------------------------|-------------------------|--------------------|---------------------|----------------------------------|----------------------------------|------------|--------------------|---------------------|----------------------------------|----------------------------------|
|                                       | $\Delta E_{\text{ZPE}}$ |                    |                     |                                  |                                  | $\Delta G$ |                    |                     |                                  |                                  |
|                                       | Zr                      | Cl <sub>2</sub> Zr | Cl <sub>2</sub> ZrA | Cl <sub>2</sub> ZrA <sub>2</sub> | Cl <sub>2</sub> ZrA <sub>3</sub> | Zr         | Cl <sub>2</sub> Zr | Cl <sub>2</sub> ZrA | Cl <sub>2</sub> ZrA <sub>2</sub> | Cl <sub>2</sub> ZrA <sub>3</sub> |
| [Zr]O <sup>+</sup> + H <sub>2</sub> S | 0.0                     | 0.0                | 0.0                 | 0.0                              | 0.0                              | 0.0        | 0.0                | 0.0                 | 0.0                              | 0.0                              |
| (H <sub>2</sub> S)[Zr]O <sup>+</sup>  | -45.2                   | -40.0              | -26.1               | -16.2                            | -16.2                            | -37.3      | -30.8              | -16.6               | -7.8                             | -6.8                             |
| TS                                    | -40.5                   | -29.9              | -24.5               | -11.8                            | -12.2                            | -31.8      | -20.4              | -15.0               | -0.9                             | 0.4                              |
| HS[Zr]OH <sup>+</sup>                 | -85.2                   | -80.5              | -61.9               | -51.3                            | -44.1                            | -77.2      | -71.3              | -51.9               | -41.2                            | -31.4                            |
|                                       | Nb                      | Cl <sub>3</sub> Nb | Cl <sub>3</sub> NbA | Cl <sub>3</sub> NbA <sub>2</sub> |                                  | Nb         | Cl <sub>3</sub> Nb | Cl <sub>3</sub> NbA | Cl <sub>3</sub> NbA <sub>2</sub> |                                  |
| [Nb]O <sup>+</sup> + H <sub>2</sub> S | 0.0                     | 0.0                | 0.0                 | 0.0                              |                                  | 0.0        | 0.0                | 0.0                 | 0.0                              |                                  |
| (H <sub>2</sub> S)[Nb]O <sup>+</sup>  | -39.7                   | -51.1              | -35.3               | -31.4                            |                                  | -31.9      | -41.0              | -26.6               | -22.0                            |                                  |
| TS                                    | -37.9                   | -47.2              | -35.1               | -31.1                            |                                  | -29.0      | -36.6              | -24.5               | -20.8                            |                                  |
| HS[Nb]OH <sup>+</sup>                 | -82.9                   | -59.9              | -46.2               | -39.8                            |                                  | -75.1      | -49.5              | -37.3               | -31.5                            |                                  |
|                                       | Zr                      | Cl <sub>2</sub> Zr | Cl <sub>2</sub> ZrA | Cl <sub>2</sub> ZrA <sub>2</sub> | Cl <sub>2</sub> ZrA <sub>3</sub> | Zr         | Cl <sub>2</sub> Zr | Cl <sub>2</sub> ZrA | Cl <sub>2</sub> ZrA <sub>2</sub> | Cl <sub>2</sub> ZrA <sub>3</sub> |
| [Zr]O <sup>+</sup> + H <sub>2</sub> O | 0.0                     | 0.0                | 0.0                 | 0.0                              | 0.0                              | 0.0        | 0.0                | 0.0                 | 0.0                              | 0.0                              |
| (H <sub>2</sub> O)[Zr]O <sup>+</sup>  | -51.7                   | -50.2              | -36.1               | -24.0                            | -20.9                            | -44.6      | -41.8              | -27.5               | -14.7                            | -9.3                             |
| TS                                    | -31.6                   | -29.5              | -21.6               | -13.2                            | -6.0                             | -23.6      | -20.2              | -12.2               | -4.8                             | 6.3                              |
| HO[Zr]OH <sup>+</sup>                 | -55.0                   | -61.9              | -48.9               | -41.8                            | -19.1                            | -48.0      | -53.0              | -40.0               | -32.3                            | -7.2                             |
|                                       | Nb                      | Cl <sub>3</sub> Nb | Cl <sub>3</sub> NbA | Cl <sub>3</sub> NbA <sub>2</sub> |                                  | Nb         | Cl <sub>3</sub> Nb | Cl <sub>3</sub> NbA | Cl <sub>3</sub> NbA <sub>2</sub> |                                  |
| [Nb]O <sup>+</sup> + H <sub>2</sub> O | 0.0                     | 0.0                | 0.0                 | 0.0                              |                                  | 0.0        | 0.0                | 0.0                 | 0.0                              |                                  |
| (H <sub>2</sub> O)[Nb]O <sup>+</sup>  | -48.2                   | -34.5              | -27.8               | -19.3                            |                                  | -40.5      | -25.4              | -17.6               | -9.3                             |                                  |
| TS                                    | -25.7                   | -11.5              | -6.8                | -0.4                             |                                  | -17.5      | -1.4               | 3.8                 | 10.1                             |                                  |
| HO[Nb]OH <sup>+</sup>                 | -56.4                   | -52.5              | -46.2               | -19.2                            |                                  | -48.6      | -42.8              | -36.0               | -9.2                             |                                  |

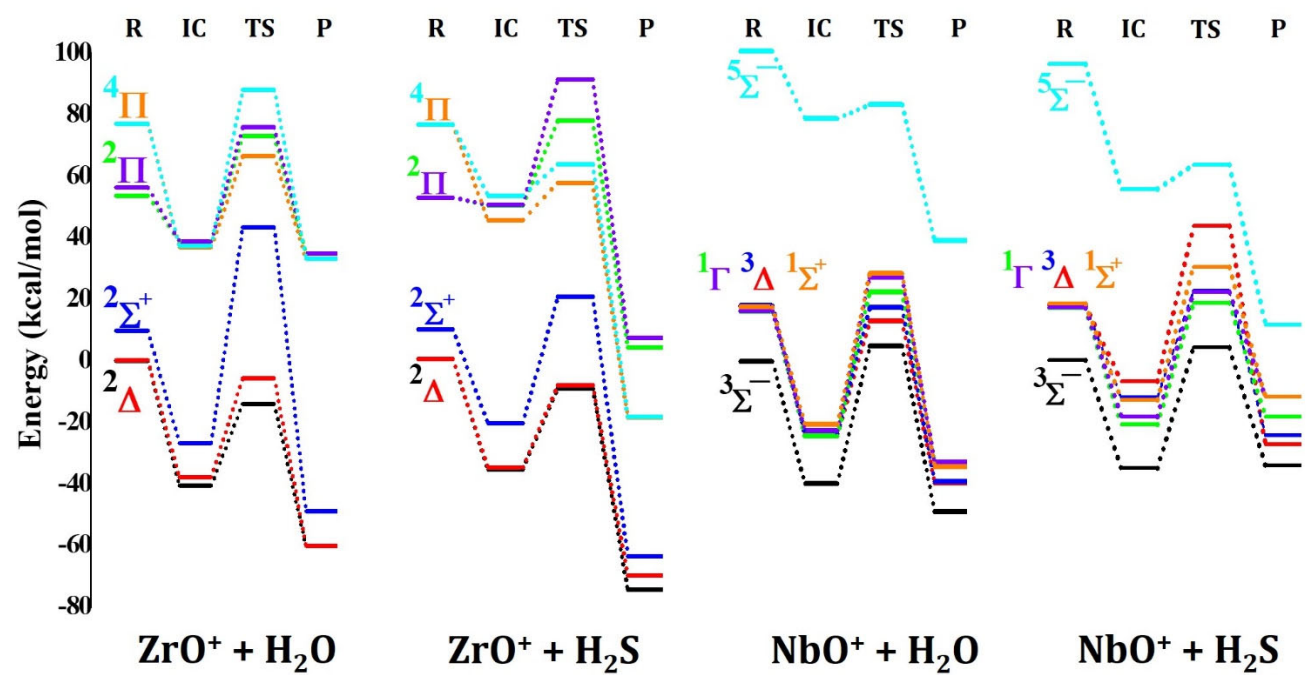

**Figure S1.** MRCI+Q//MRCI energy landscape of  $\text{MO}^+ + \text{H}_2\text{X} \rightarrow [\text{HX-M-OH}]^+$  ( $\text{M} = \text{Zr}, \text{Nb}$  and  $\text{X} = \text{O}, \text{S}$ ) reactions. R, IC, TS, and P stands for the corresponding reactants ( $\text{MO}^+ + \text{H}_2\text{X}$ ), interacting complex ( $[\text{H}_2\text{X}\dots\text{MO}]^+$ ), transition states, and products  $[\text{HX-M-OH}]^+$ , respectively.

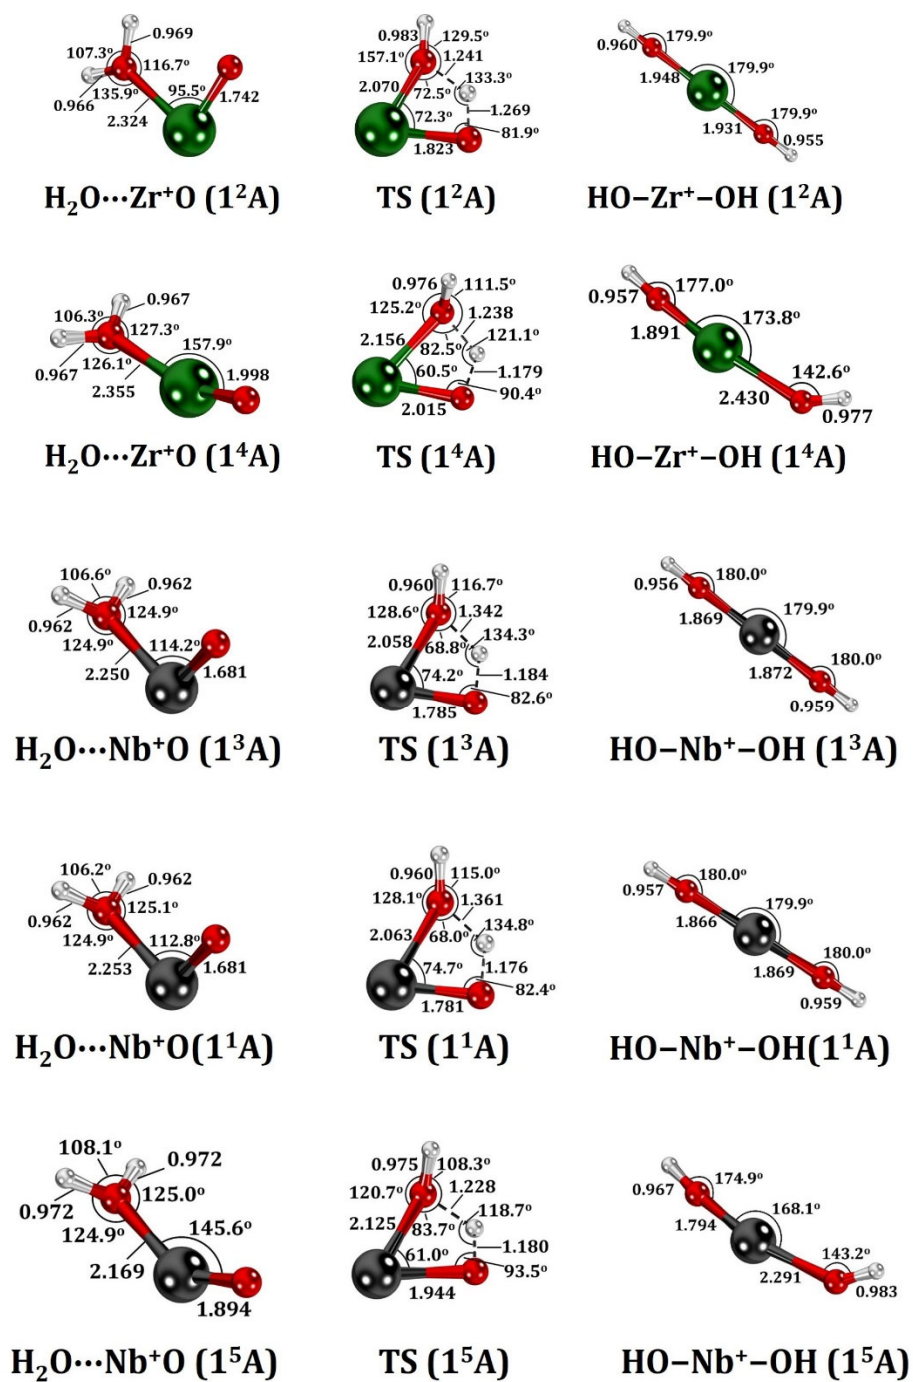

**Figure S2.** MRCI optimized structures for the ground and excited states for the  $\text{ZrO}^+ + \text{H}_2\text{O}$  and  $\text{NbO}^+ + \text{H}_2\text{O}$  reactions.

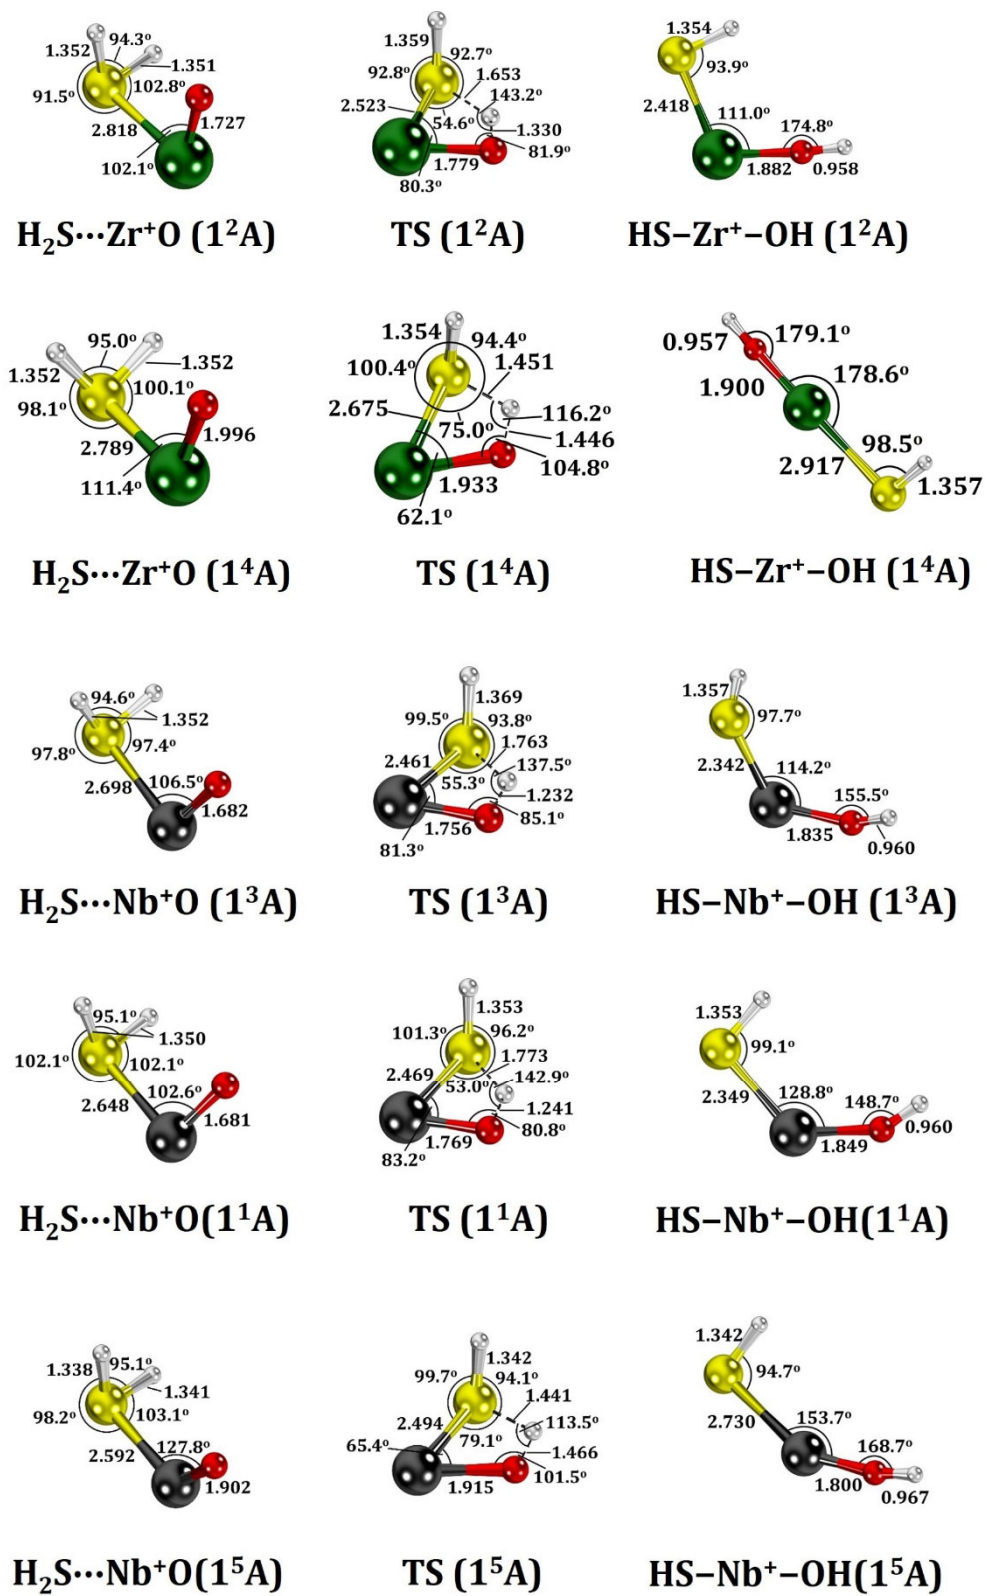

**Figure S3.** MRCI optimized structures for the ground and excited states for the  $\text{ZrO}^+ + \text{H}_2\text{S}$  and  $\text{NbO}^+ + \text{H}_2\text{S}$  reactions.



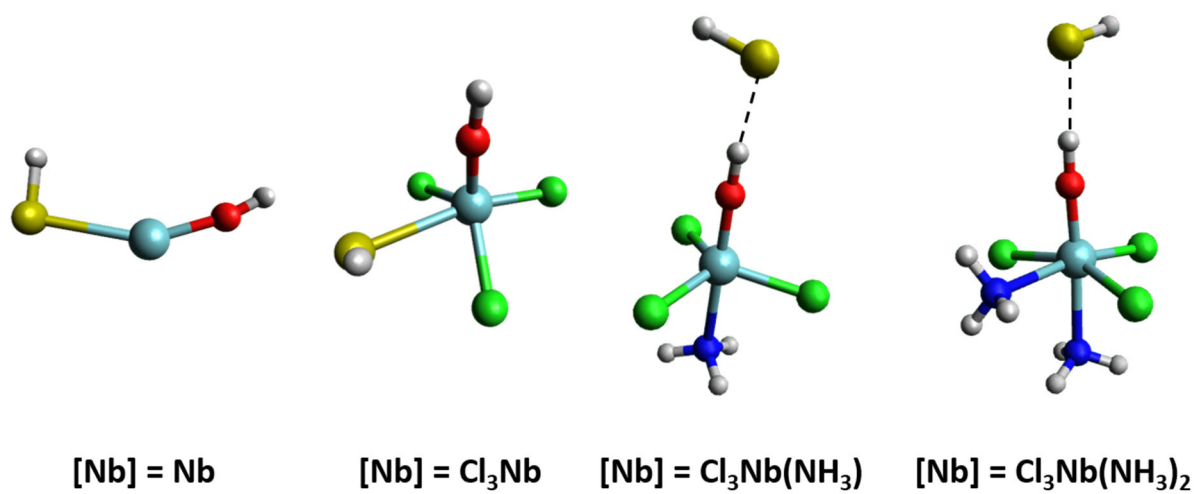

**Figure S4.** DFT/MN15 optimized structures for the ground state of the HS[Nb]OH products.

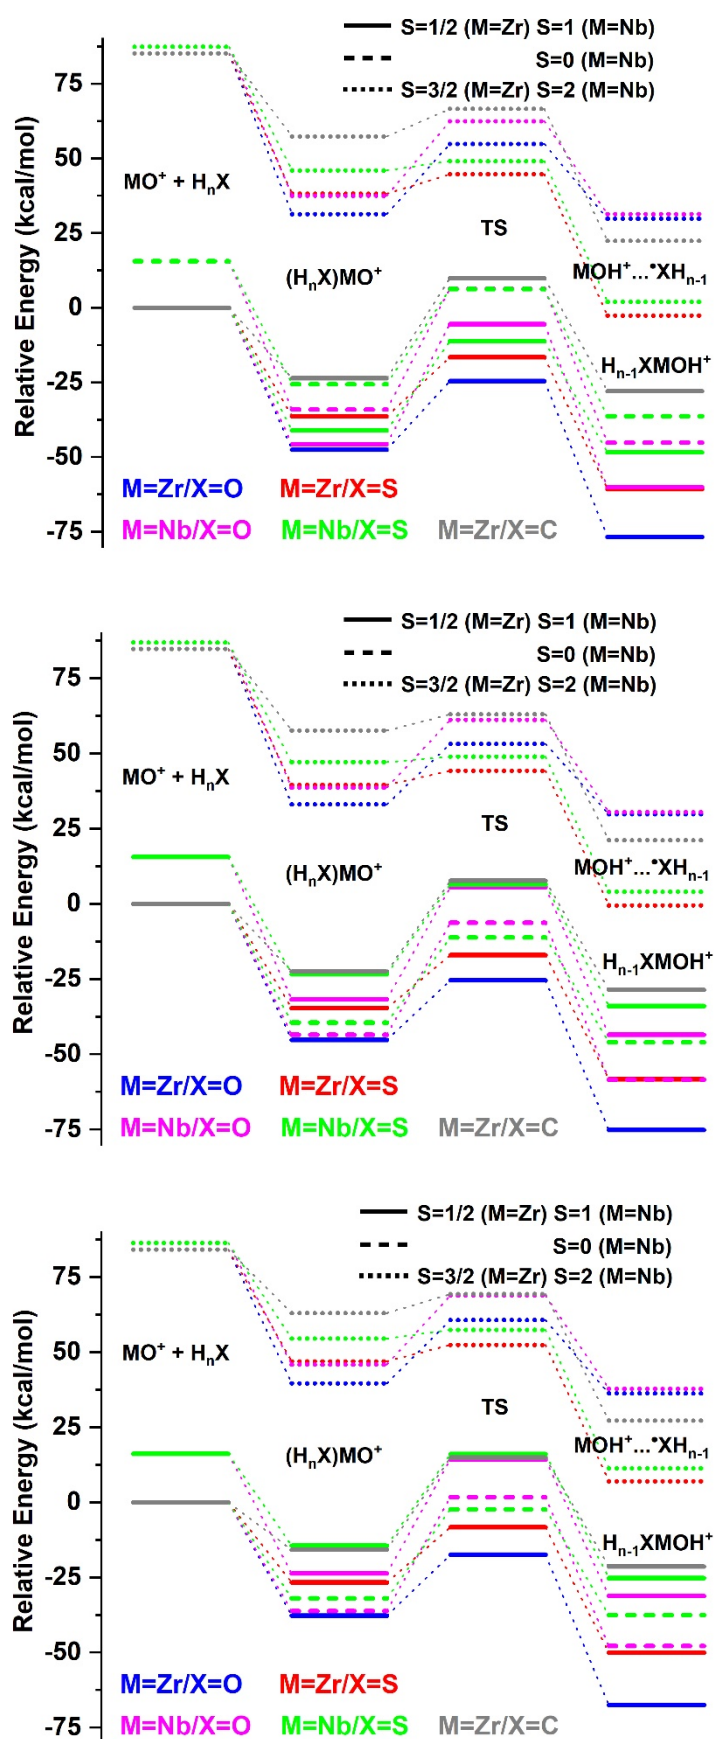

**Figure S5.** Energy diagrams (top: total energy; middle: ZPE-corrected energy; bottom: free energy at room temperature and 1 atm pressure) for the  $ZrO^+/NbO^+ + H_2O/H_2S/CH_4$  reactions ( $n=2$  except for  $X=C$  where  $n=4$ ). The zero of the energy scale is set to the energy of the ground state fragments (compare to Figure 1 of the manuscript).

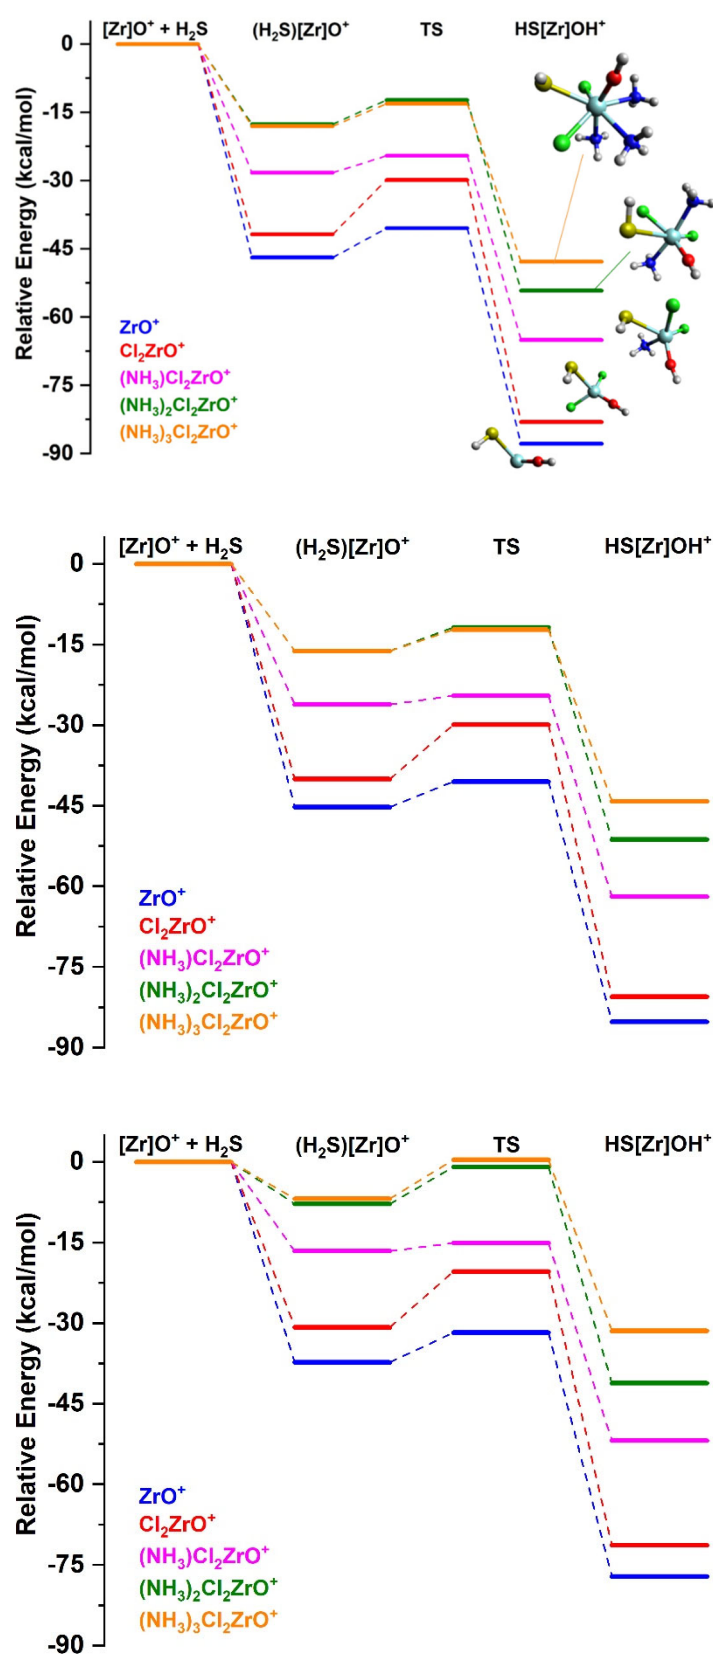

**Figure S6.** Energy diagrams (top: total energy; middle: ZPE-corrected energy; bottom: free energy at room temperature and 1 atm pressure) for the reaction of  $[Zr]O^{*+}$  ( $S=3/2$  for  $ZrO$  and  $S=1/2$  otherwise) with  $H_2S$ , where  $[Zr]$  represents the transition metal complex  $(NH_3)_mCl_nZr$  ( $m,n = 0,0 ; 0,2; 1,2; 2,2; 3,2$ ); compare to Figure 4 of the manuscript.
